# Supplementary material for: Total synthesis of jamaicamide B
Source: Royal Society of Chemistry journal article supplement (doi:10.1039/d4ob00580e), 2024-01-01
Supplement: d4ob00580e1.pdf [file d4ob00580e1.pdf]

## **Total synthesis of jamaicamide B**

Ryosuke Shigeta, Takahiro Suzuki, Kazuki Kaneko, Hiroaki Tanaka, Ibuki Haishima,  
Kanata Norio, Ayano Tanaka-Yanuma and Toyonobu Usuki\*

*Department of Materials and Life Sciences, Faculty of Science and Technology, Sophia  
University, 7-1 Kioicho, Chiyoda-ku, Tokyo 102-8554, Japan*

\* Corresponding author. E-mail: [t-usuki@sophia.ac.jp](mailto:t-usuki@sophia.ac.jp)

### **Contents**

S2-S31: Experimental section

S32-S74: NMR spectra

S75-76: Comparison of NMR spectra

**General experimental section:**

All non-aqueous reactions were conducted under an atmosphere of nitrogen with magnetic stirring unless otherwise indicated. *N,N*-Dimethylformamide (DMF) was purchased from commercial suppliers and was distilled under reduced pressure. Other solvents, such as acetone, dichloromethane (CH<sub>2</sub>Cl<sub>2</sub>), methanol (MeOH), acetonitrile (MeCN), diethyl ether (Et<sub>2</sub>O), and tetrahydrofuran (THF) were purchased from commercial suppliers and stored over activated molecular sieves. All reagents were obtained from commercial suppliers and used without further purification unless otherwise stated. Analytical thin layer chromatography (TLC) was performed on Silica gel 60 F254 plates produced by Merck. Column chromatography was performed with acidic Silica gel 60 (spherical, 40-50 μm) or neutral Silica gel 60N (spherical, 40-50 μm) produced by Kanto Chemicals (Tokyo, Japan). Small amounts of solvent were removed using a BioChromato Smart Evaporator CEB8CL-AQ (Kanagawa, Japan).

Optical rotations were measured on a JASCO (Tokyo, Japan) P-2200 digital polarimeter at the sodium lamp ( $\lambda = 589\text{nm}$ ) D line and are reported as follows:  $[\alpha]_{\text{D}}^{\text{T}}$  (c g/100 mL, solvent). <sup>1</sup>H and <sup>13</sup>C nuclear magnetic resonance (NMR) spectra were recorded on a JEOL (Tokyo, Japan) JNM-EXC 300 spectrometer (300 MHz) or on a JEOL JNM-ECA 500 spectrometer (500 MHz) or on a Bruker Avance III AD (400 MHz). <sup>1</sup>H NMR data are reported as follows: chemical shift ( $\delta$ , ppm), integration, multiplicity (s, singlet; d, doublet; t, triplet; q, quartet; m, multiplet), coupling constants (*J*) in Hz, assignments. <sup>13</sup>C NMR data are reported in terms of chemical shift ( $\delta$ , ppm). Electrospray ionization-mass spectrometer (ESI-MS) spectra were recorded on a JEOL JMS-T100LC instrument. Fast atom bombardment (FAB)-MS spectra were also observed on a JEOL JMS-700. MS data are reported in mass-to-charge ratio (*m/z*).

The carbon numbering on  $^1\text{H}$  NMR of all compounds is corresponding with jamaicamide B (1).

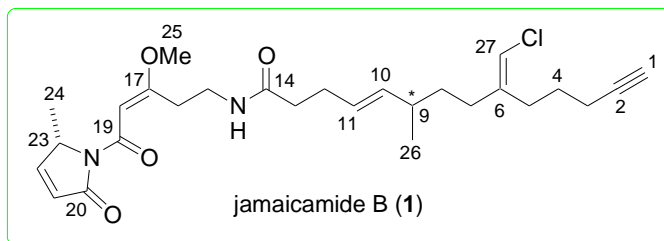

**(5'S)-Benzyl-1'-[(6E)-chloromethylene-1-triethylsilyl-dec-1-ynoyl]-oxazolidin-10-one, (5'S)-oxazolidinone 3:**

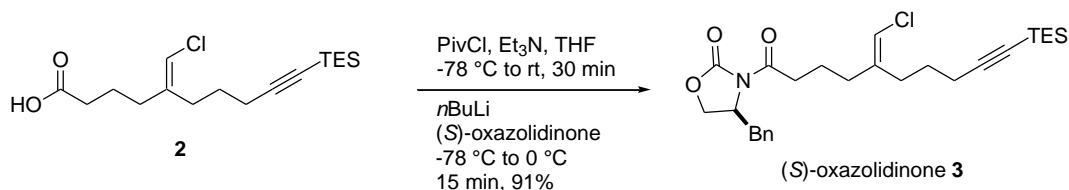

To a solution of **2** (508 mg, 1.54 mmol, 1.0 equiv) in THF (15 mL) cooled to  $-78\text{ }^\circ\text{C}$  was added  $\text{Et}_3\text{N}$  (321  $\mu\text{L}$ , 2.32 mmol, 1.5 equiv) and PivCl (228  $\mu\text{L}$ , 1.85 mmol, 1.2 equiv). After stirring at  $-78\text{ }^\circ\text{C}$  for 15 min, the reaction mixture was warmed to  $0\text{ }^\circ\text{C}$ , stirred for 20 min, and cooled to  $-78\text{ }^\circ\text{C}$ . To a solution of (*S*)-oxazolidinone (547 mg, 3.09 mmol, 2.0 equiv) in THF (8.6 mL) cooled to  $-78\text{ }^\circ\text{C}$  was added 2.6 M *n*BuLi in hexane (1.09 mL, 2.934 mmol, 1.9 equiv). After the reaction mixture was stirring at  $-78\text{ }^\circ\text{C}$  for 30 min, the reaction mixture was warmed to  $0\text{ }^\circ\text{C}$ . After stirred at  $0\text{ }^\circ\text{C}$  for 20 min, the reaction mixture was cooled to  $-78\text{ }^\circ\text{C}$  and added the ester **2** solution and warmed to  $0\text{ }^\circ\text{C}$ . After stirred for 15 min, the reaction mixture was diluted with EtOAc, and quenched with diluted  $\text{NH}_4\text{Cl}$  solution. The aqueous layer was then extracted with EtOAc. The combined organic layers were washed with brine, dried over  $\text{Na}_2\text{SO}_4$ , and concentrated *in vacuo*. Purification on silica gel column chromatography (hexane/EtOAc = 10:1) afforded (*5'S*)-oxazolidinone **3** as a colorless oil (686 mg, 1.41 mmol, 91%);  $R_f$  0.51 (hexane/EtOAc = 3:1);  $^1\text{H}$  NMR (500 MHz,  $\text{CDCl}_3$ )  $\delta$  7.36-7.20 (5H, m, Bn), 5.87 (1H, s, H<sub>27</sub>), 4.68-4.65 (1H, m, CH), 4.22-4.16 (2H, m, CH<sub>2</sub>), 3.31-3.27 (1H, m, CH<sub>2</sub>), 2.95-2.90 (2H, m, H<sub>9</sub>), 2.78-2.74 (1H, m, CH<sub>2</sub>), 2.36-2.27 (4H, m, H<sub>3/5</sub>), 2.19 (2H, t,  $J = 7.5\text{ Hz}$ , H<sub>7</sub>), 1.86-1.82 (2H, m, H<sub>8</sub>), 1.70-1.64 (2H, m, H<sub>4</sub>), 0.98 (9H, t,  $J = 7.9\text{ Hz}$ , TES), 0.58 (6H, q,  $J = 7.9\text{ Hz}$ , TES);  $^{13}\text{C}\{^1\text{H}\}$  NMR (75 MHz,  $\text{CDCl}_3$ )  $\delta$  172.8, 153.6, 141.3, 135.4, 129.5, 129.1,

*Electronic Supplementary Information*

127.5, 113.6, 108.0, 82.2, 66.4, 55.3, 38.0, 34.9, 34.3, 29.3, 26.5, 22.3, 20.0, 7.6, 4.6; ESI-  
HRMS ( $m/z$ ) calcd for  $C_{27}H_{38}ClNO_3SiNa$   $[M+Na]^+$  510.22072, found 510.22114.

**(5'R)-Benzyl-1'-[(6E)-chloromethylene-1-triethylsilyl-dec-1-ynoyl]-oxazolidin-10-one, (5'R)-oxazolidinone 3:**

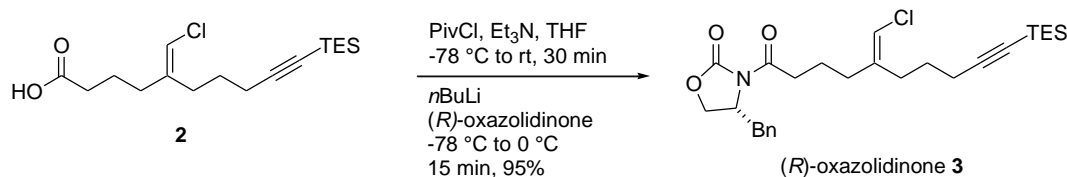

To a solution of **2** (556 mg, 1.69 mmol, 1.0 equiv) in THF (17 mL) cooled to -78 °C was added Et<sub>3</sub>N (352 μL, 2.54 mmol, 1.5 equiv) and PivCl (250 μL, 2.03 mmol, 1.2 equiv). After stirring at -78 °C for 15 min, the reaction mixture was warmed to 0 °C, stirred for 20 min, and cooled to -78 °C. To a solution of (R)-oxazolidinone (600 mg, 3.38 mmol, 2.0 equiv) in THF (9.4 mL) cooled to -78 °C was added 2.6 M *n*BuLi in hexane (1.19 mL, 3.21 mmol, 1.9 equiv). After the reaction mixture was stirring at -78 °C for 30 min, the reaction mixture was warmed to 0 °C. After stirred at 0 °C for 20 min, the reaction mixture was cooled to -78 °C and added the ester **2** solution and warmed to 0 °C. After stirred for 15 min, the reaction mixture was diluted with EtOAc, and quenched with diluted NH<sub>4</sub>Cl solution. The aqueous layer was then extracted with EtOAc. The combined organic layers were washed with brine, dried over Na<sub>2</sub>SO<sub>4</sub>, and concentrated *in vacuo*. Purification on silica gel column chromatography (hexane/EtOAc = 10:1) afforded (5'R)-oxazolidinone **3** as a colorless oil (787 mg, 1.61 mmol, 95%); *R*<sub>f</sub> 0.51 (hexane/EtOAc = 3:1); <sup>1</sup>H NMR (500 MHz, CDCl<sub>3</sub>) δ 7.36-7.20 (5H, m, Bn), 5.88 (1H, s, H<sub>27</sub>), 4.69-4.65 (1H, m, CH), 4.23-4.16 (2H, m, CH<sub>2</sub>), 3.31-3.28 (1H, m, CH<sub>2</sub>), 2.98-2.89 (2H, m, H<sub>9</sub>), 2.80-2.74 (1H, m, CH<sub>2</sub>), 2.37-2.27 (4H, m, H<sub>3/5</sub>), 2.18 (2H, t, *J* = 7.5 Hz, H<sub>7</sub>), 1.87-1.81 (2H, m, H<sub>8</sub>), 1.70-1.62 (2H, m, H<sub>4</sub>), 0.99 (9H, t, *J* = 7.9 Hz, TES), 0.58 (6H, q, *J* = 7.9 Hz, TES); <sup>13</sup>C {<sup>1</sup>H} NMR (125 MHz, CDCl<sub>3</sub>) δ 172.7, 153.3, 141.3, 135.2, 129.5, 129.0,

*Electronic Supplementary Information*

127.4, 113.5, 108.0, 82.2, 77.4, 77.2, 76.9, 66.3, 55.2, 38.0, 34.9, 34.3, 29.3, 26.4, 22.2, 20.0, 14.2, 7.60, 4.63; ESI-HRMS ( $m/z$ ) calcd for  $C_{27}H_{38}ClNO_3SiNa [M+Na]^+$  510.22072, found 510.22210.

**(5'S)-Benzyl-1'-[(6E)-chloromethylene-1-triethylsilyl-(9S)-methyl-dec-1-ynoyl]-oxazolidin-10-one, (9S)-4:**

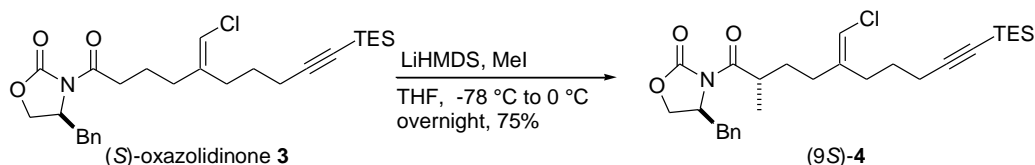

To a solution of (*S*)-oxazolidinone **3** (355 mg, 0.727 mmol, 1.0 equiv) in THF (3.63 mL) cooled to -78 °C was added 1.3 M LiHMDS (0.727 mL, 0.945 mmol, 1.3 equiv) and stirred at -78 °C for 35 min, warmed to 0 °C. After stirred for 10 min, to the reaction mixture was added MeI (226  $\mu$ L, 3.63 mmol, 5.0 equiv) at -78 °C. After stirring for overnight at 0 °C, the reaction mixture was diluted with EtOAc and quenched with saturated NH<sub>4</sub>Cl solution. The aqueous layer was then extracted with EtOAc. The combined organic layers were washed with brine, dried over Na<sub>2</sub>SO<sub>4</sub>, and concentrated *in vacuo*. Purification on silica gel column chromatography (hexane/EtOAc = 10:1) afforded (*9S*)-**4** as a colorless oil (273 mg, 0.544 mmol, 75%); *R*<sub>f</sub> 0.60 (hexane/EtOAc = 3:1); <sup>1</sup>H NMR (500 MHz, CDCl<sub>3</sub>)  $\delta$  7.36-7.20 (5H, m, Bn), 5.81 (1H, s, H<sub>27</sub>), 4.67 (1H, m, CH), 4.24-4.16 (2H, m, CH<sub>2</sub>), 3.68-3.67 (1H, m, H<sub>9</sub>), 3.25-3.22 (1H, m, CH<sub>2</sub>), 2.79-2.75 (1H, m, CH<sub>2</sub>), 2.34-2.26 (4H, m, H<sub>3/5</sub>), 2.10-2.07 (2H, m, H<sub>7</sub>), 1.98-1.62 (4H, m, H<sub>8/4</sub>), 1.24 (3H, d, *J* = 6.6 Hz, H<sub>26</sub>), 0.99 (9H, t, *J* = 7.9 Hz, TES), 0.58 (6H, q, *J* = 7.9 Hz, TES); <sup>13</sup>C{<sup>1</sup>H} NMR (75 MHz, CDCl<sub>3</sub>)  $\delta$  176.7, 153.2, 141.8, 135.3, 129.6, 129.1, 127.5, 113.2, 108.0, 82.2, 66.2, 55.4, 38.0, 37.7, 33.0, 31.3, 29.2, 26.5, 20.0, 18.1, 7.6, 4.6; ESI-HRMS (*m/z*) calcd for C<sub>28</sub>H<sub>40</sub>ClNO<sub>3</sub>SiNa [M+Na]<sup>+</sup> 524.23637, found 510.23683.



**(5'R)-Benzyl-1'-[(6E)-chloromethylene-1-triethylsilyl-(9R)-methyl-dec-1-ynoyl]-oxazolidin-10-one, (9R)-4:**

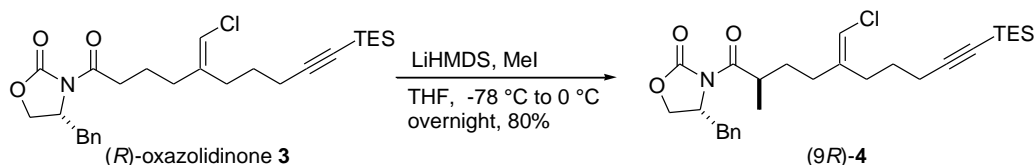

To a solution of (*R*)-oxazolidinone **3** (392 mg, 0.804 mmol, 1.0 equiv) in THF (4.0 mL) cooled to -78 °C was added 1.3 M LiHMDS (0.809 mL, 1.05 mmol, 1.3 equiv) and stirred at -78 °C for 35 min, warmed to 0 °C. After stirred for 10 min, to the reaction mixture was added MeI (275  $\mu$ L, 4.42 mmol, 5.5 equiv) at -78 °C. After stirring for overnight at 0 °C, the reaction mixture was diluted with EtOAc and quenched with saturated NH<sub>4</sub>Cl solution. The aqueous layer was then extracted with EtOAc. The combined organic layers were washed with brine, dried over Na<sub>2</sub>SO<sub>4</sub>, and concentrated *in vacuo*. Purification on silica gel column chromatography (hexane/EtOAc = 10:1) afforded (*9R*)-**4** as a colorless oil (322 mg, 0.642 mmol, 80%); *R*<sub>f</sub> 0.60 (hexane/EtOAc = 3:1); <sup>1</sup>H NMR (500 MHz, CDCl<sub>3</sub>)  $\delta$  7.36-7.20 (5H, m, Bn), 5.82 (1H, s, H<sub>27</sub>), 4.70-4.65 (1H, m, CH), 4.25-4.16 (2H, m, CH<sub>2</sub>), 3.70-3.66 (1H, m, H<sub>9</sub>), 3.26-3.22 (1H, m, CH<sub>2</sub>), 2.80-2.75 (1H, m, CH<sub>2</sub>), 2.36-2.25 (4H, m, H<sub>3/5</sub>), 2.14-2.01 (2H, m, H<sub>7</sub>), 1.99-1.62 (4H, m, H<sub>8/4</sub>), 1.23 (3H, d, *J* = 6.6 Hz, H<sub>26</sub>), 0.99 (9H, t, *J* = 7.9 Hz, TES), 0.58 (6H, q, *J* = 7.9 Hz, TES); <sup>13</sup>C{<sup>1</sup>H} NMR (125 MHz, CDCl<sub>3</sub>)  $\delta$  176.6, 153.2, 141.8, 135.3, 129.6, 129.1, 127.5, 113.3, 108.0, 82.2, 66.2, 55.4, 38.0, 37.7, 33.1, 31.3, 29.3, 26.5, 20.0, 18.1, 14.3, 7.66, 4.69; ESI-HRMS (*m/z*) calcd for C<sub>28</sub>H<sub>40</sub>ClNO<sub>3</sub>SiNa [M+Na]<sup>+</sup> 524.23637, found 524.23778.

**(6E)-Chloromethylene-1-triethylsilyl-(9S)-methyl-dec-1-yn-10-ol, (9S)-5:**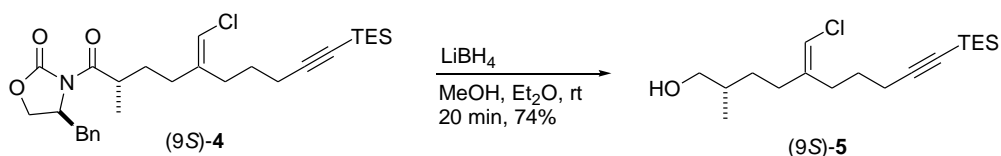

To a solution of (9S)-4 (267 mg, 0.531 mmol, 1.0 equiv) in Et<sub>2</sub>O (4.2 mL) cooled to 0 °C was added MeOH (71 μL, 1.751 mmol, 3.3 equiv) and 4.0 M LiBH<sub>4</sub> (0.398 ml, 1.593 mmol, 4.0 equiv). After stirring at room temperature for 20 min, the reaction mixture was diluted with Et<sub>2</sub>O at 0 °C and quenched with saturated NH<sub>4</sub>Cl solution. The aqueous layer was then extracted with Et<sub>2</sub>O. The combined organic layers were washed with brine, dried over Na<sub>2</sub>SO<sub>4</sub>, and concentrated *in vacuo*. Purification on silica gel column chromatography (hexane/EtOAc = 8:1) afforded (9S)-5 as a colorless oil (130 mg, 0.394 mmol, 74%); <sup>1</sup>H NMR (500 MHz, CDCl<sub>3</sub>) δ 5.83 (1H, s, H27), 3.52-3.43 (2H, m, H10), 2.35-2.26 (4H, m, H3/5), 2.15-2.06 (2H, m, H7), 1.68-1.54 (4H, m, H8/4), 1.25-1.20 (1H, m H9), 1.00-0.92 (12H, m, TES/26), 0.59 (6H, q, *J* = 7.9 Hz, TES); <sup>13</sup>C{<sup>1</sup>H} NMR (75 MHz, CDCl<sub>3</sub>) δ 142.2, 112.9, 108.1, 82.2, 68.1, 35.4, 32.5, 31.2, 29.5, 26.5, 20.0, 16.5, 7.6, 4.7; ESI-HRMS (*m/z*) calcd for C<sub>18</sub>H<sub>33</sub>ClNaOSi [M+Na]<sup>+</sup> 351.18869, found 351.18902.

**(6E)-Chloromethylene-1-triethylsilyl-(9R)-methyl-dec-1-yn-10-ol, (9R)-5:**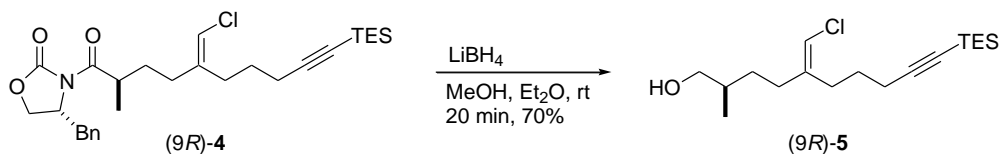

To a solution of (9R)-4 (624.3 mg, 1.243 mmol, 1.0 equiv) in Et<sub>2</sub>O (9.8 mL) cooled to 0 °C was added MeOH (76 μL, 1.865 mmol, 1.5 equiv) and 4.0 M LiBH<sub>4</sub> (0.373 ml, 1.492 mmol, 1.5 equiv). After stirring at room temperature for 20 min, the reaction mixture was diluted with Et<sub>2</sub>O at 0 °C and quenched with saturated NH<sub>4</sub>Cl solution. The aqueous layer was then extracted with Et<sub>2</sub>O. The combined organic layers were washed with brine, dried over Na<sub>2</sub>SO<sub>4</sub>, and concentrated *in vacuo*. Purification on silica gel column chromatography (hexane/EtOAc = 8:1) afforded (9R)-5 as a colorless oil (287 mg, 0.871 mmol, 70%); <sup>1</sup>H NMR (500 MHz, CDCl<sub>3</sub>) δ 5.83 (1H, s, H27), 3.50-3.46 (2H, m, H10), 2.37-2.27 (4H, m, H3/5), 2.20-2.05 (2H, m, H7), 1.69-1.54 (4H, m, H8/4), 1.24-1.21 (1H, m, H9), 1.01-0.93 (12H, m, TES/26), 0.59 (6H, q, *J* = 7.9 Hz, TES); <sup>13</sup>C{<sup>1</sup>H} NMR (125 MHz, CDCl<sub>3</sub>) δ 142.2, 112.9, 1108.1, 82.2, 68.2, 35.5, 32.6, 31.3, 29.5, 26.5, 20.0, 16.6, 7.66, 4.70; ESI-HRMS (*m/z*) calcd for C<sub>18</sub>H<sub>33</sub>ClNaOSi [M+Na]<sup>+</sup> 351.18869, found 351.18879.



**(6E)-Chloromethylene-1-triethylsilyl-(9R)-methyl-dec-1-yn-10-al, (9R)-6:**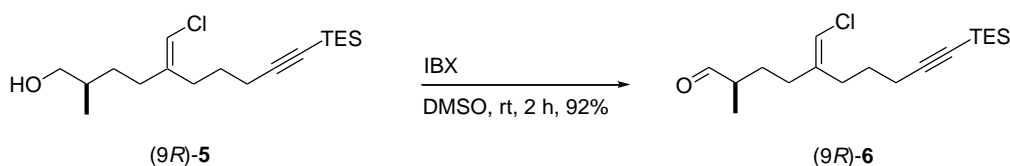

To a solution of (9R)-5 (287 mg, 0.870 mmol, 1.0 equiv) in DMSO (8.7 mL) was added IBX (610 mg, 2.18 mmol, 2.5 equiv). After stirring at room temperature for 2 h, the reaction mixture was quenched with H<sub>2</sub>O and filtered. The aqueous layer was then extracted with hexane/EtOAc = 4:1. The combined organic layers were washed with brine, dried over Na<sub>2</sub>SO<sub>4</sub>, and concentrated *in vacuo*. Purification on silica gel column chromatography (hexane/EtOAc = 20:1) afforded (9R)-6 as a yellow oil (262 mg, 0.80 mmol, 92%); *R*<sub>f</sub> 0.57 (hexane/EtOAc = 10:1); <sup>1</sup>H NMR (500 MHz, CDCl<sub>3</sub>) δ 9.61 (1H, m, H10), 5.85 (1H, s, H27), 2.35-2.27 (4H, m, H3/5), 2.14-2.11 (2H, m, H7), 1.90-1.83 (1H, m, H9), 1.68-1.43 (4H, m, H8/4), 1.13 (3H, d, *J* = 6.9 Hz, H26), 0.99 (9H, t, *J* = 7.9 Hz, TES), 0.57 (6H, q, *J* = 7.9 Hz, TES); <sup>13</sup>C {<sup>1</sup>H} NMR (125 MHz, CDCl<sub>3</sub>) δ 204.4, 141.2, 113.8, 107.9, 82.4, 45.8, 32.3, 29.3, 28.6, 26.4, 20.0, 13.5, 7.7, 4.7; ESI-HRMS (*m/z*) calcd for C<sub>18</sub>H<sub>31</sub>ClOSiNa [M+Na]<sup>+</sup> 349.17304, found 349.17269.

**(6E)-Chloromethylene-1-triethylsilyl-(9S)-methyl-tetradec-(10E)-ene-1-ynoic acid benzyl ester, (9S)-8:**

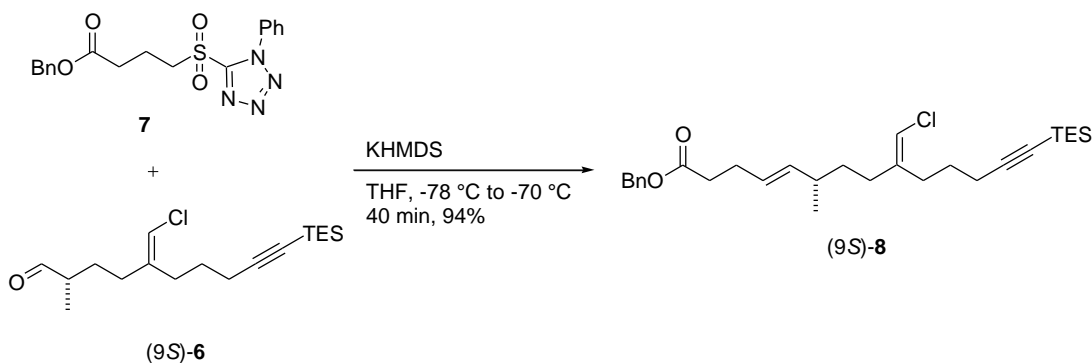

To a solution of the sulfone 7 (138 mg, 0.356 mmol, 3.0 equiv) in THF (3.56 mL) cooled to -78 °C was added 0.5 M KHMDS in toluene (0.688 mL, 0.344 mmol, 2.9 equiv). After the reaction mixture was stirred at -78 °C for 0.5 h, to the reaction mixture was added a solution of the aldehyde (9S)-6 (38.8 mg, 0.119 mmol, 1.0 equiv) in THF (0.659 mL) at -78 °C. After stirring at -70 °C for 40 min, the reaction mixture was quenched with saturated NH<sub>4</sub>Cl solution. The aqueous layer was then extracted with EtOAc. The combined organic layers were washed with brine, dried over Na<sub>2</sub>SO<sub>4</sub>, and concentrated *in vacuo*. Purification on silica gel column chromatography (hexane/EtOAc = 20:1) afforded (9S)-8 as a yellow oil (54.2 mg, 0.111 mmol, 94%); *R*<sub>f</sub> 0.49 (hexane/EtOAc = 10:1); <sup>1</sup>H NMR (400 MHz, CDCl<sub>3</sub>) δ 7.36-7.34 (5H, m, Bn), 5.78 (1H, s, H27), 5.40-5.24 (2H, m, H10/11), 5.11 (2H, s, Bn), 2.45-2.25 (8H, m, H3/5/12/13), 2.05-1.97 (3H, m, H7/9), 1.66-1.59 (2H, m, H4), 1.33-1.26 (2H, m, H8), 1.04-0.85 (12H, m, H26/TES), 0.57 (6H, q, *J* = 7.8 Hz, TES); ESI-HRMS (*m/z*) calcd for C<sub>29</sub>H<sub>43</sub>ClNaO<sub>2</sub>Si [M+Na]<sup>+</sup> 509.26185, found 509.26201.

**(6E)-Chloromethylene-1-triethylsilyl-(9R)-methyl-tetradec-(10E)-ene-1-ynoic acid benzyl ester, (9R)-8:**

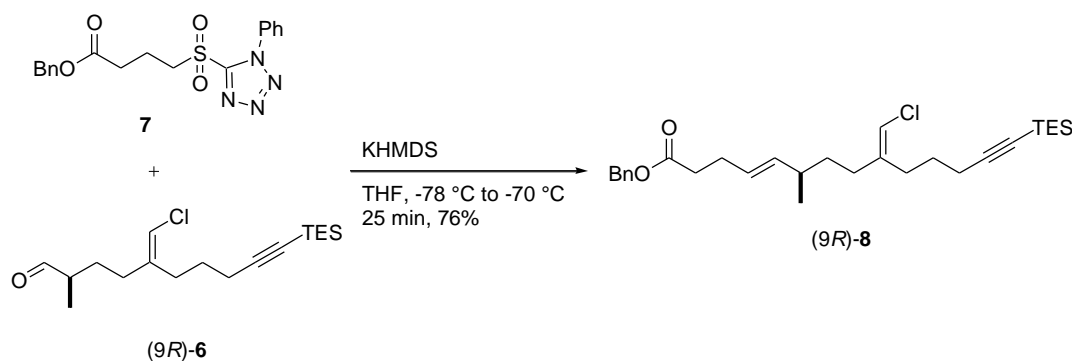

To a solution of the sulfone **7** (262 mg, 2.40 mmol, 3.0 equiv) in THF (24 mL) cooled to -78 °C was added 0.5 M KHMDS in toluene (4.64 mL, 2.32 mmol, 2.9 equiv). After the reaction mixture was stirred at -78 °C for 0.5 h, to the reaction mixture was added a solution of the aldehyde (9R)-**6** (262 mg, 0.800 mmol, 1.0 equiv) in THF (4.4 mL) at -78 °C. After stirring at -70 °C for 25 min, the reaction mixture was quenched with saturated NH<sub>4</sub>Cl solution. The aqueous layer was then extracted with EtOAc. The combined organic layers were washed with brine, dried over Na<sub>2</sub>SO<sub>4</sub>, and concentrated *in vacuo*. Purification on silica gel column chromatography (hexane/EtOAc = 20:1) afforded (9R)-**8** as a yellow oil (267 mg, 0.548 mmol, 76%); *R*<sub>f</sub> 0.49 (hexane/EtOAc = 10:1); <sup>1</sup>H NMR (500 MHz, CDCl<sub>3</sub>) δ 7.36-7.32 (5H, m, Bn), 5.78 (1H, s, H<sub>27</sub>), 5.39-5.24 (2H, m, H<sub>10/11</sub>), 5.11 (2H, s, Bn), 2.45-2.26 (8H, m, H<sub>3/5/12/13</sub>), 2.05-1.98 (3H, m, H<sub>7/9</sub>), 1.66-1.60 (2H, m, H<sub>4</sub>), 1.40-1.27 (2H, m, H<sub>8</sub>), 1.00-0.93 (12H, m, H<sub>26/28</sub>), 0.57 (6H, q, *J* = 7.8 Hz, TES); <sup>13</sup>C {<sup>1</sup>H} NMR (125 MHz, CDCl<sub>3</sub>) δ 172.8, 141.9, 136.9, 135.9, 128.4, 128.1, 126.8, 112.4, 107.9, 81.9, 66.0, 36.2, 34.6, 34.3, 32.6, 30.2, 29.2, 27.8, 26.2, 20.7, 19.8, 7.4, 4.5; ESI-HRMS (*m/z*) calcd for C<sub>29</sub>H<sub>43</sub>ClNaO<sub>2</sub>Si [M+Na]<sup>+</sup> 509.26185, found 509.26503.

**(6E)-Chloromethylene-1-triethylsilyl-(9S)-methyl-tetradec-(10E)-ene-1-ynoic acid, (9S)-9:**

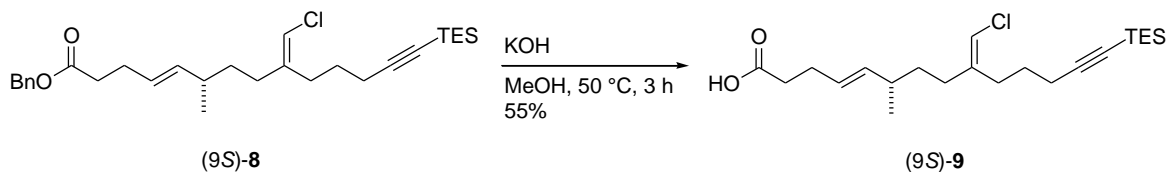

To a solution of (9S)-8 (9.8 mg, 20.1  $\mu\text{mol}$ , 1.0 equiv) in MeOH (0.02 mL) was added 85% KOH (3.98 mg, 60.3  $\mu\text{mol}$ , 3.0 equiv) in H<sub>2</sub>O (0.1 mL). After stirring at 50  $^\circ\text{C}$  for 3 h, the reaction mixture was quenched with 2M HCl (30.2  $\mu\text{L}$ ). The aqueous layer was then extracted with EtOAc. The combined organic layers were washed with brine, dried over Na<sub>2</sub>SO<sub>4</sub>, and concentrated *in vacuo*. Purification on silica gel column chromatography (hexane/EtOAc = 5/1) afforded (9S)-9 as a yellow oil (4.4 mg, 11.1  $\mu\text{mol}$ , 55%);  $R_f$  0.47 (hexane/EtOAc = 3:1); <sup>1</sup>H NMR (500 MHz, CDCl<sub>3</sub>)  $\delta$  5.79 (1H, s, H27), 5.40-5.28 (2H, m, H10/11), 2.43-2.26 (8H, m, H3/5/12/13), 2.05-1.99 (3H, m, H7/9), 1.67-1.61 (2H, m, H4), 1.43-1.30 (2H, m, H8), 1.00-0.96 (12H, m, H26/TES), 0.57 (6H, q,  $J = 7.8$  Hz, TES); ESI-HRMS ( $m/z$ ) calcd for C<sub>22</sub>H<sub>36</sub>ClO<sub>2</sub>Si [M-H]<sup>-</sup> 395.21731, found 395.21557.



**(6E)-Chloromethylene-1-triethylsilyl-(9R)-methyl-tetradec-(10E)-ene-1-ynoic acid, (9R)-9:**

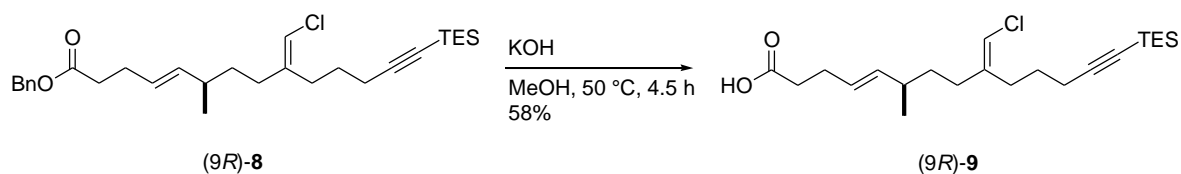

To a solution of (9R)-8 (278 mg, 0.57 mmol, 1.0 equiv) in MeOH (5.7 mL) was added 85% KOH (112.9 mg, 1.71 mmol, 3.0 equiv) in H<sub>2</sub>O (2.82 mL). After stirring at 50 °C for 4.5 h, the reaction mixture was quenched with 1M HCl (3.4 mL). The aqueous layer was then extracted with EtOAc. The combined organic layers were washed with brine, dried over Na<sub>2</sub>SO<sub>4</sub>, and concentrated *in vacuo*. Purification on silica gel column chromatography (hexane/EtOAc = 5/1) afforded (9R)-9 as a yellow oil (131 mg, 0.331 mmol, 58%); *R*<sub>f</sub> 0.47 (hexane/EtOAc = 3:1); <sup>1</sup>H NMR (500 MHz, CDCl<sub>3</sub>) δ 5.79 (1H, s, H27), 5.41-5.28 (2H, m, H10/11), 2.44-2.26 (8H, m, H3/5/12/13), 2.07-1.99 (3H, m, H7/9), 1.67-1.61 (2H, m, H4), 1.43-1.32 (2H, m, H8), 1.01-0.96 (12H, m, H26/TES), 0.57 (6H, q, *J* = 7.8 Hz, TES); <sup>13</sup>C {<sup>1</sup>H} NMR (125 MHz, CDCl<sub>3</sub>) δ 178.8, 142.2, 137.3, 126.8, 112.7, 108.2, 82.2, 36.6, 34.9, 34.2, 32.9, 26.5, 27.7, 26.5, 20.9, 20.1, 7.7, 6.7, 5.9, 4.9, 4.7; ESI-HRMS (*m/z*) calcd for C<sub>22</sub>H<sub>37</sub>ClNaO<sub>2</sub>Si [M+Na]<sup>+</sup> 419.21490, found 419.21432.

**[21,22-Dihydro-(23*S*)-methyl-20-oxo-pyrrolinyl]-17,19-dioxo-pent-15-amine, 11b:**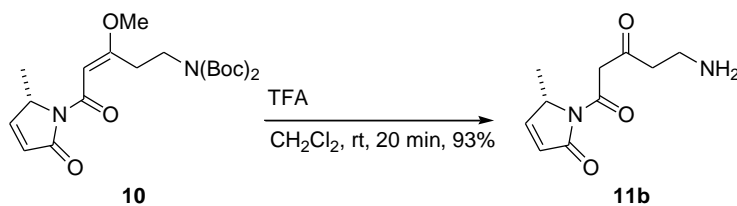

To a solution of **10** (5.9 mg, 0.013 mmol, 1.0 equiv) in CH<sub>2</sub>Cl<sub>2</sub> (0.22 mL) was added TFA (0.073 mL). After stirring at rt for 20 min, the reaction mixture was concentrated *in vacuo* and afforded **11b** as a yellow oil (2.7 mg, 0.013 mmol, 93%); *R<sub>f</sub>* 0.13 (hexane/EtOAc = 3:1); <sup>1</sup>H NMR (500 MHz, CDCl<sub>3</sub>) δ 7.78 (2H, br, NH), 7.31 (1H, q, *J* = 5.1 Hz, H22), 6.05 (1H, d, *J* = 5.0 Hz, H21), 4.81 (1H, q, *J* = 5.1 Hz, H23), 4.00 (2H, q, *J* = 7.2 Hz, H15), 3.37 (2H, s, H18), 3.07 (2H, t, *J* = 3.7 Hz, H16), 1.47 (3H, m, H24); <sup>13</sup>C {<sup>1</sup>H} NMR (125 MHz, CDCl<sub>3</sub>) δ 175.6, 172.6, 171.2, 152.4, 91.5, 82.3, 55.9, 44.1, 43.1, 31.7; ESI-HRMS (*m/z*) calcd for C<sub>22</sub>H<sub>36</sub>ClO<sub>2</sub> [M+H]<sup>+</sup> 395.21731, found 395.21557.

**2'-(Trimethylsilyl)ethoxycarbonylamino-17-oxo-pentanoic acid methyl ester, 14:**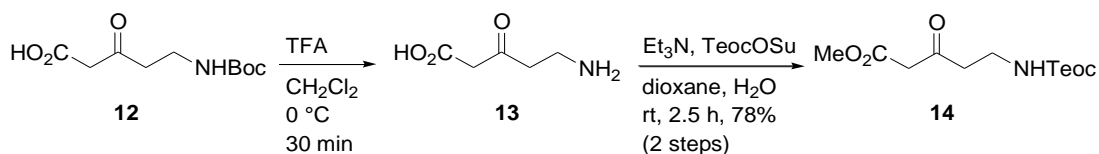

To a solution of **12** (0.500 g, 2.03 mmol, 1.0 equiv) in  $\text{CH}_2\text{Cl}_2$  (10 mL) was added TFA (10 mL) at  $0^\circ\text{C}$ . After stirring at room temperature for 30 min, the reaction mixture was concentrated *in vacuo* to afford **13** as a pink oil, which was used for the second step without further purification.

Next, the residue **13** was dissolved in dioxane/ $\text{H}_2\text{O}$  (20 mL) and the  $\text{Et}_3\text{N}$  (62  $\mu\text{L}$ , 4.49 mmol, 2.2 equiv) and TeocOSu (63.5 mg, 2.45 mmol, 1.2 equiv) was added. After stirring at room temperature for 2.5 h, the reaction mixture was diluted with  $\text{H}_2\text{O}$ . The reaction mixture was extracted with ether, washed with brine, and dried over  $\text{Na}_2\text{SO}_4$ . Concentration *in vacuo* and purification on silica gel column chromatography (hexane/ $\text{EtOAc}$  = 2:1) afforded **14** as a colorless oil (0.453 g, 1.58 mmol, 78%);  $R_f$  0.7 (hexane/ $\text{EtOAc}$  = 1:1);  $^1\text{H}$  NMR (500 MHz,  $\text{CDCl}_3$ )  $\delta$  5.08 (1H, s, H18), 4.12 (1H, t,  $J$  = 7.5 Hz, H16), 3.67 (3H, s,  $\text{CO}_2\text{Me}$ ), 3.65 (3H, s, OMe), 3.41 (2H, m, Teoc), 2.94 (2H, t,  $J$  = 5.0 Hz, H15), 0.96 (2H, m, Teoc), 0.03 (9H, s, Teoc);  $^{13}\text{C}\{^1\text{H}\}$  NMR (125 MHz,  $\text{CDCl}_3$ )  $\delta$  202.34, 168.96, 167.51, 156.95, 63.28, 49.31, 43.21, 35.56, 17.76, -1.05, -1.25, -1.37; ESI-HRMS ( $m/z$ ) calcd for  $\text{C}_{12}\text{H}_{23}\text{NO}_5\text{SiNa}$  [ $\text{M}+\text{Na}$ ] $^+$  312.1243, found 312.1253.

**2'-(Trimethylsilyl)ethoxycarbonylamino-17-methoxy-pent-(17E)-enoic acid methyl ester, **15**:**

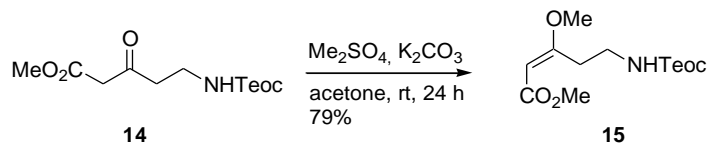

To a solution of **14** (0.092 g, 0.318 mmol, 1.0 equiv) and  $\text{K}_2\text{CO}_3$  (0.051 g, 0.350 mmol, 1.1 equiv) in acetone (6 mL) was added  $\text{Me}_2\text{SO}_4$  (0.036  $\mu\text{L}$ , 0.350 mmol, 1.1 equiv). After stirring at room temperature for 24 h, the reaction mixture was concentrated *in vacuo*. Purification on silica gel column chromatography (hexane/EtOAc = 6:1) afforded **15** as a colorless oil (0.087 g, 0.251 mmol, 79%);  $R_f$  0.79 (hexane/EtOAc = 1:1);  $^1\text{H}$  NMR (500 MHz,  $\text{CDCl}_3$ )  $\delta$  5.08 (1H, s, H18), 5.07 (1H, br, NH) 3.68 (3H, s,  $\text{CO}_2\text{Me}$ ), 3.64 (3H, s, H25), 3.42 (2H, m, Teoc), 2.95 (2H, t,  $J = 6.6$  Hz, H15), 0.95 (2H, t,  $J = 6.6$  Hz, Teoc), 0.03 (9H, s, Teoc);  $^{13}\text{C}\{^1\text{H}\}$  NMR (125 MHz,  $\text{CDCl}_3$ )  $\delta$  177.66, 156.92, 156.50, 101.61, 62.65, 54.76, 47.94, 40.04, 33.64, 17.46, -1.55, -1.75, -1.79; ESI-HRMS ( $m/z$ ) calcd for  $\text{C}_{13}\text{H}_{25}\text{NO}_5\text{SiNa}$   $[\text{M}+\text{Na}]^+$  326.1400, found 326.1415.

**2'-(Trimethylsilyl)ethoxycarbonylamino-17-methoxy-pent-(17E)-enoic acid, 16:**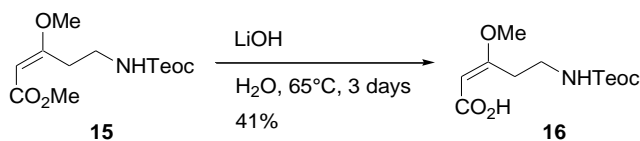

To a solution of **15** (67 mg, 0.22 mmol, 1.0 equiv) in THF (0.5 mL) was added H<sub>2</sub>O (0.5 mL) and LiOH (11.5 mg, 0.48 mmol, 3.0 equiv). After stirring at 65 °C for 3 days, the reaction mixture was diluted with EtOAc. The aqueous layer was then extracted with EtOAc. The combined organic layers were washed with brine, dried over Na<sub>2</sub>SO<sub>4</sub>, and concentrated *in vacuo*. Purification on silica gel column chromatography (hexane/EtOAc = 5/1) afforded **16** as a colorless solid (24 mg, 0.09 mmol, 41%); *R*<sub>f</sub> 0.2 (hexane/EtOAc = 1:1); <sup>1</sup>H NMR (500 MHz, CDCl<sub>3</sub>) δ 5.07 (1H, s, H18), 4.96 (1H, br, NH), 4.08 (2H, t, *J* = 10.0 Hz, H16), 3.64 (3H, s, H25), 3.39 (2H, m, Teoc), 2.93 (2H, t, *J* = 5.0 Hz, 15H) 0.93 (2H, m, Teoc), 0.00 (9H, s, Teoc); <sup>13</sup>C{<sup>1</sup>H} NMR (125 MHz, CDCl<sub>3</sub>) δ 175.32, 172.76, 156.74, 91.74, 62.86, 55.85, 38.90, 32.25, 17.67, -1.31, -1.51, -1.72; ESI-HRMS (*m/z*) calcd for C<sub>11</sub>H<sub>19</sub>NO<sub>5</sub> [M-H]<sup>-</sup> 288.12672 found 288.12784.

**2'-(Trimethylsilyl)ethoxycarbonylamino-17-methoxy-pent-(17E)-enoic acid pentafluorophenol ester, 17:**

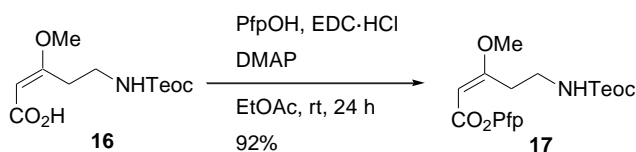

To a solution of **16** (50 mg, 0.19 mmol, 1.0 equiv), DMAP (25 mg, 0.173 mmol, 1.0 equiv), and PfpOH (95 mg, 0.519 mmol, 3.0 equiv) in EtOAc (5 mL) cooled to 0 °C was added EDC·HCl (40 mg, 0.208 mmol, 1.2 equiv). After stirring at room temperature for 24 h, the reaction mixture was diluted with EtOAc. The aqueous layer was then extracted with EtOAc. The combined organic layers were washed with brine, dried over Na<sub>2</sub>SO<sub>4</sub>, and concentrated *in vacuo*. Purification on silica gel column chromatography (hexane/EtOAc = 4:1) afforded **17** as a colorless solid (80.2 mg, 0.18 mmol, 92%); *R<sub>f</sub>* 0.80 (hexane/EtOAc = 1:1); <sup>1</sup>H NMR (500 MHz, CDCl<sub>3</sub>) δ 5.10 (1H, s, H18), 5.02 (1H, s, NH) 4.12 (2H, t, *J* = 10.0 Hz, H16), 3.67 (3H, s, H25), 3.42 (2H, m, Teoc), 2.96 (2H, t, *J* = 5.0 Hz, H15), 0.03 (9H, s, Teoc); <sup>13</sup>C {<sup>1</sup>H} NMR (125 MHz, CDCl<sub>3</sub>) δ 178.72, 163.70, 156.94, 89.09, 63.24, 56.66, 38.93, 33.24, 17.92, -1.27, -1.47, -1.58; ESI-HRMS (*m/z*) calcd for C<sub>18</sub>H<sub>22</sub>F<sub>5</sub>NNaO<sub>5</sub>Si [M+Na]<sup>+</sup> 478.10851, found 478.10818.

**{17-Methoxy-19-[(23*S*)-methyl-20-oxo-pyrrolidiny]-19-oxo-pent-(17*E*)-enyl}-2'-  
(trimethylsilyl)ethoxycarbonyl-amine, (**19**):**

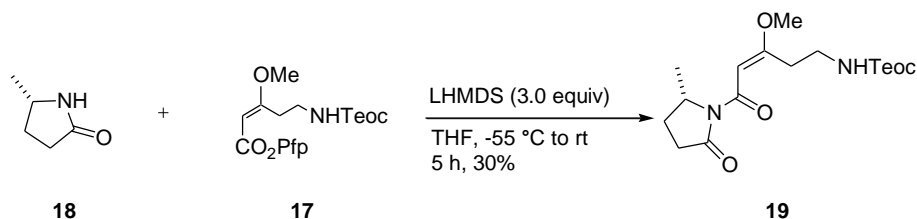

To a solution of **18** (0.18 g, 1.77 mmol, 3.0 equiv) in THF (4.0 mL) was added LiHMDS (1.56 mmol, 3.0 equiv) at  $-55\text{ }^\circ\text{C}$ . After stirring at  $-55\text{ }^\circ\text{C}$  for 30 min, the reaction mixture was added a solution of **17** (0.27 g, 0.59 mmol, 1.0 equiv) in THF (3 mL). After stirring for 5 h at  $-55\text{ }^\circ\text{C}$  to  $0\text{ }^\circ\text{C}$ , the reaction mixture was concentrated *in vacuo*. Purification on silica gel column chromatography (hexane/EtOAc = 10:1 to 5:1) afforded **19** as a colorless oil (0.066 g, 0.18 mmol, 30%);  $R_f$  0.32 (hexane/EtOAc = 3:1);  $^1\text{H}$  NMR (500 MHz,  $\text{CDCl}_3$ )  $\delta$  6.66 (1H, s, H18), 5.37 (1H, br, NH), 4.53 (1H, t,  $J = 7.5$  Hz, H23), 4.12 (2H, m, Teoc), 3.71 (3H, s, H25), 3.42 (2H, m, H15), 2.92 (2H, t,  $J = 7.5$  Hz, H16), 2.74 (1H, m, H21), 2.51 (1H, m, H21), 2.16 (1H, m, H22), 1.68 (1H, m, H22), 1.33 (3H, s, H24), 0.95 (2H, m, Teoc), 0.05 (9H, m, Teoc);  $^{13}\text{C}\{^1\text{H}\}$  NMR (125 MHz,  $\text{CDCl}_3$ )  $\delta$  175.39, 175.09, 166.42, 156.80, 94.99, 62.69, 55.96, 53.40, 39.21, 32.54, 24.86, 19.75, 17.70, -1.27, -1.47, -1.58; ESI-HRMS ( $m/z$ ) calcd for  $\text{C}_{17}\text{H}_{30}\text{N}_2\text{NaO}_5\text{Si}$   $[\text{M}+\text{Na}]^+$  393.18217, found 393.18387.

***N*-{19-[21,22-Dihydro-(23*S*)-methyl-20-oxo-pyrrolyl]-17,19-dioxo-pentyl}-(6*E*)-chloromethylene-1-triethylsilyl-(9*S*)-methyl-tetradec-(10*E*)-ene-1-ynamide, (9*S*)-21:**

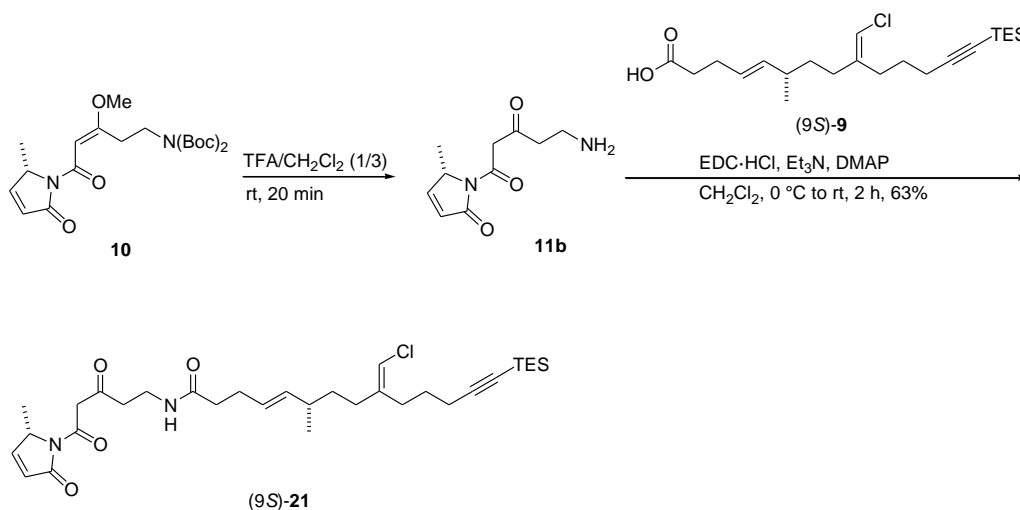

To a solution of **10** (43.6 mg, 0.10 mmol, 1.0 equiv) in CH<sub>2</sub>Cl<sub>2</sub> (1.6 mL) was added TFA (0.516 mL). After stirring at rt for 20 min, the reaction mixture was concentrated *in vacuo* and afforded **11b**, which was used for next reaction without further purification.

Next, to a solution of **11b** in CH<sub>2</sub>Cl<sub>2</sub> (0.5 mL) was added (9*S*)-**9** in CH<sub>2</sub>Cl<sub>2</sub> (1.5 mL), DMAP (3.4 mg, 0.028 mmol, 0.3 equiv), Et<sub>3</sub>N (38.6 μL, 0.279 mmol, 3.0 equiv) and EDC · HCl (26.7 mg, 0.139 mmol, 1.5 equiv) at 0 °C. After stirring at room temperature for 2 h, the reaction mixture was quenched with H<sub>2</sub>O. The aqueous layer was then extracted with CH<sub>2</sub>Cl<sub>2</sub>. The combined organic layers were washed with brine, dried over Na<sub>2</sub>SO<sub>4</sub>, and concentrated *in vacuo*. Purification on silica gel column chromatography (hexane/EtOAc = 1/3) afforded (9*S*)-**21** as a yellow oil (35 mg, 59.5 μmol, 63%); *R*<sub>f</sub> 0.42 (hexane/EtOAc = 1:3); <sup>1</sup>H NMR (400 MHz, CDCl<sub>3</sub>) δ 7.30-7.28 (1H, dd, *J* = 10, 2.5 Hz, H<sub>22</sub>), 6.04-6.02 (1H, s, H<sub>21</sub>), 5.79 (1H, s, H<sub>27</sub>), 5.39-5.24 (2H, m, H<sub>10/11</sub>), 4.85-4.80 (1H, m, H<sub>23</sub>), 3.99 (2H, s, H<sub>18</sub>), 3.56-3.51 (2H, m, H<sub>15</sub>), 2.81-2.78



*Electronic Supplementary Information*

(2H, m, H16), 2.45-2.25 (8H, m, H3/5/12/13), 2.04-1.99 (3H, m, H7/9), 1.67-1.65 (2H, m, H4), 1.62-1.60 (3H, m, Me), 1.50-1.47 (2H, m, H24), 1.39-1.31 (2H, m, H8), 1.00-0.94 (9H, m, TES), 0.60-0.54 (6H, q,  $J = 7.8$  Hz, TES); ESI-HRMS ( $m/z$ ) calcd for  $C_{32}H_{49}ClN_2O_4SiNa$   $[M+Na]^+$  611.30478, found 611.30324.

***N*-{19-[21,22-Dihydro-(23*S*)-methyl-20-oxo-pyrrolyl]-17,19-dioxo-pentyl}-(6*E*)-chloromethylene-1-triethylsilyl-(9*R*)-methyl-tetradec-(10*E*)-ene-1-ynamide, (9*R*)-21:**

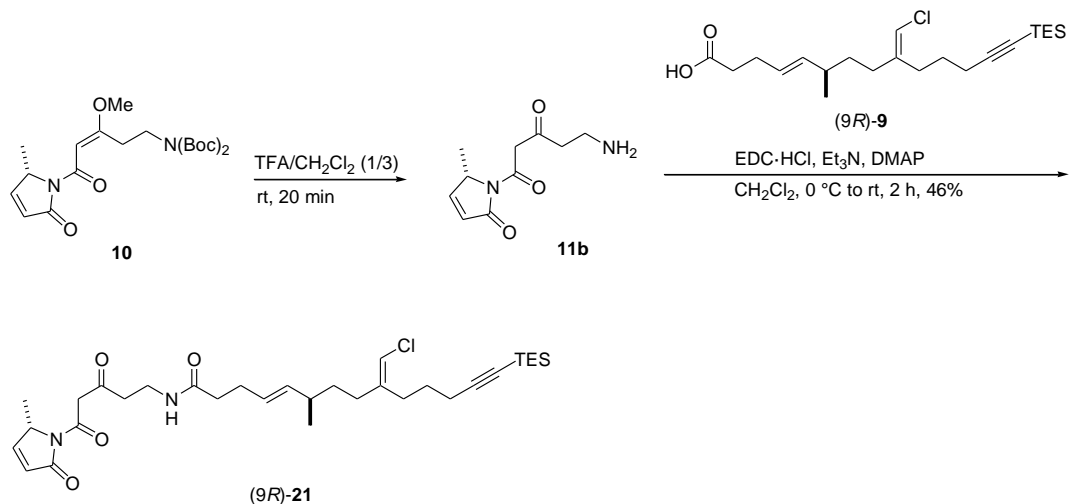

To a solution of **10** (44.0 mg, 0.10 mmol, 1.0 equiv) in CH<sub>2</sub>Cl<sub>2</sub> (1.7 mL) was added TFA (0.521 mL). After stirring at rt for 20 min, the reaction mixture was concentrated *in vacuo* and afforded **11b**, which was used for next reaction without further purification.

Next, to a solution of **11b** in CH<sub>2</sub>Cl<sub>2</sub> (0.5 mL) was added (9*R*)-**9** in CH<sub>2</sub>Cl<sub>2</sub> (1.5 mL), DMAP (3.78 mg, 0.031 mmol, 0.3 equiv), Et<sub>3</sub>N (28.6 μL, 0.206 mmol, 2.0 equiv) and EDC · HCl (29.8 mg, 0.155 mmol, 1.5 equiv) at 0 °C. After stirring at room temperature for 2 h, the reaction mixture was quenched with H<sub>2</sub>O. The aqueous layer was then extracted with CH<sub>2</sub>Cl<sub>2</sub>. The combined organic layers were washed with brine, dried over Na<sub>2</sub>SO<sub>4</sub>, and concentrated *in vacuo*. Purification on silica gel column chromatography (hexane/EtOAc = 1/3) afforded (9*R*)-**21** as a yellow oil (28 mg, 0.0476 mmol, 46%); *R<sub>f</sub>* 0.42 (hexane/EtOAc = 1:3); <sup>1</sup>H NMR (500 MHz, CDCl<sub>3</sub>) δ 7.30-7.28 (1H, m, H22), 7.23 (1H, brs, NH), 6.08 (1H, m, H21), 6.04-6.02 (1H, s, H18), 5.79 (1H,

s, H27), 5.37-5.26 (2H, m, H10/11), 4.84-4.82 (1H, m, H23) , 3.56-3.53 (2H, m, H15), 2.82-2.79 (2H, m, H16), 2.32-2.16 (8H, m, H3/5/12/13), 2.04-1.99 (3H, m, H7/9), 1.67-1.65 (2H, m, H4), 1.62-1.60 (3H, m, Me), 1.50-1.47 (2H, m, H24), 1.39-1.31 (2H, m, H8), 1.00-0.94 (9H, m, TES), 0.60-0.54 (6H, q,  $J = 7.8$  Hz, TES);  $^{13}\text{C}\{^1\text{H}\}$  NMR (100 MHz,  $\text{CDCl}_3$ )  $\delta$  203.3, 172.4, 170.1, 165.5, 154.4, 142.1, 136.8, 127.4, 125.1, 112.6, 108.0, 82.1, 58.1, 52.1, 42.4, 36.7, 36.3, 34.8, 34.0, 32.7, 29.4, 28.5, 26.4, 20.8, 19.9, 17.5, 7.49, 4.56; ESI-HRMS ( $m/z$ ) calcd for  $\text{C}_{32}\text{H}_{49}\text{ClN}_2\text{O}_4\text{SiNa}$   $[\text{M}+\text{Na}]^+$  611.30478, found 611.30412.

***N*-{19-[21,22-Dihydro-(23*S*)-methyl-5-oxo-pyrrolyl]-17-methoxy-19-oxo-pent-(17*E*)-enyl}-(6*E*)-chloromethylene-(10*E*)-ene-(9*S*)-methyl-1-triethylsilyl-tetradec-1-ynamide, (9*S*)-22:**

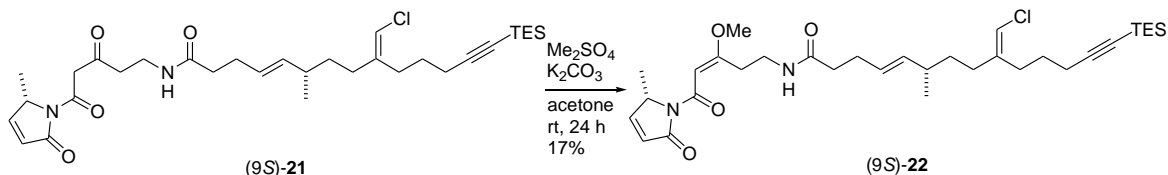

To a solution of (9*S*)-**21** (14.41 mg, 24.5  $\mu\text{mol}$ , 1.0 equiv) and  $\text{K}_2\text{CO}_3$  (3.7 mg, 26.9  $\mu\text{mol}$ , 1.1 equiv) in acetone (175  $\mu\text{L}$ ) was added  $\text{Me}_2\text{SO}_4$ . After stirring at rt for 24 h, the reaction mixture was concentrated *in vacuo*. Purification on silica gel column chromatography (hexane/EtOAc = 1/1) afforded (9*S*)-**22** as a yellow oil (2.5 mg, 4.2  $\mu\text{mol}$ , 17%);  $R_f$  0.58 (hexane/EtOAc = 1:3);  $^1\text{H NMR}$  (500 MHz,  $\text{CDCl}_3$ )  $\delta$  7.30-7.28 (1H, m, H22), 6.73 (1H, s, H18), 6.70 (1H, brs, NH), 6.08 (1H, dd,  $J = 5.8, 1.9$  Hz, H21), 5.79 (1H, s, H27), 5.39-5.24 (2H, m, H10/11), 4.85-4.80 (1H, m, H23), 3.75 (3H, s, Me), 3.49 (2H, m, H15), 3.03-2.80 (2H, m, H16), 2.45-2.25 (8H, m, H3/5/12/13), 2.04-1.99 (3H, m, H7/9), 1.66-1.60 (2H, m, H4), 1.50-1.47 (2H, d, H24), 1.39-1.31 (2H, m, H8), 1.00-0.94 (12H, m, H26/TES), 0.60-0.54 (6H, q,  $J = 7.8$  Hz, TES); FAB-MS ( $m/z$ ) calcd for  $\text{C}_{33}\text{H}_{51}\text{ClN}_2\text{O}_4\text{Si}$   $[\text{M}+\text{H}]^+$  603.3379, found 603.2319.

***N*-{19-[21,22-Dihydro-(23*S*)-methyl-5-oxo-pyrrolyl]-17-methoxy-19-oxo-pent-(17*E*)-enyl}-(6*E*)-chloromethylene-(10*E*)-ene-(9*R*)-methyl-1-triethylsilyl-tetradec-1-ynamide, (9*R*)-22:**

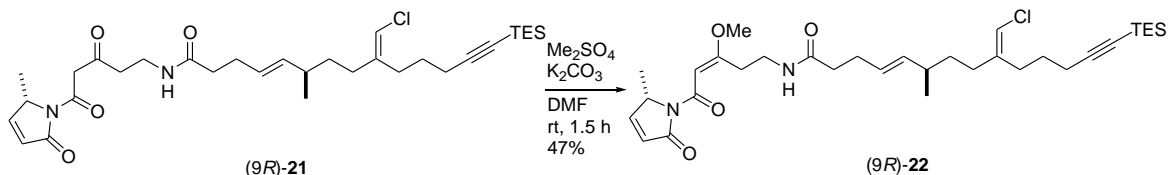

To a solution of (9*R*)-21 (17.64 mg, 30.0  $\mu\text{mol}$ , 1.0 equiv) and  $\text{K}_2\text{CO}_3$  (4.56 mg, 33.0  $\mu\text{mol}$ , 1.1 equiv) in DMF (220  $\mu\text{L}$ ) was added  $\text{Me}_2\text{SO}_4$ . After stirring at rt for 1.5 h, the reaction mixture was quenched with saturated  $\text{NH}_4\text{Cl}$  solution. The aqueous layer was then extracted with EtOAc. The combined organic layers were washed with brine, dried over  $\text{Na}_2\text{SO}_4$ , and concentrated *in vacuo*. Purification on silica gel column chromatography (hexane/EtOAc = 1/1) afforded (9*R*)-22 as a yellow oil (8.5 mg, 14.1  $\mu\text{mol}$ , 47%);  $R_f$  0.58 (hexane/EtOAc = 1:3);  $^1\text{H}$  NMR (500 MHz,  $\text{CDCl}_3$ )  $\delta$  7.30-7.28 (1H, m, H22), 6.73 (1H, s, H18), 6.70 (1H, brs, NH), 6.08 (1H, dd,  $J = 5.8, 2.0$  Hz, H21), 5.79 (1H, s, H27), 5.39-5.24 (2H, m, H10/11), 4.85-4.80 (1H, m, H23), 3.75 (3H, s, Me), 3.49 (2H, m, H15), 3.03-2.80 (2H, m, H16), 2.45-2.25 (8H, m, H3/5/12/13), 2.04-1.99 (3H, m, H7/9), 1.66-1.60 (2H, m, H4), 1.50-1.47 (2H, m, H24), 1.39-1.31 (2H, m, H8), 1.00-0.94 (12H, m, H26/TES), 0.60-0.54 (6H, q,  $J = 7.8$  Hz, TES);  $^{13}\text{C}$   $\{^1\text{H}\}$  NMR (125 MHz,  $\text{CDCl}_3$ )  $\delta$  175.3, 172.4, 170.0, 166.0, 153.1, 142.1, 136.6, 127.5, 125.8, 112.6, 107.9, 95.0, 61.9, 58.1, 56.1, 38.2, 36.7, 36.3, 34.8, 32.7, 32.4, 29.3, 28.6, 26.3, 20.8, 19.9, 17.9, 7.49, 4.55.

***N*-{19-[21,22-Dihydro-(23*S*)-methyl-20-oxo-pyrrolyl]-17-methoxy-19-oxo-pent-(17*E*)-enyl}-(6*E*)-chloromethylene-(10*E*)-ene-(9*S*)-methyl-tetradec-1-ynamide, (9*S*)-**

**1:**

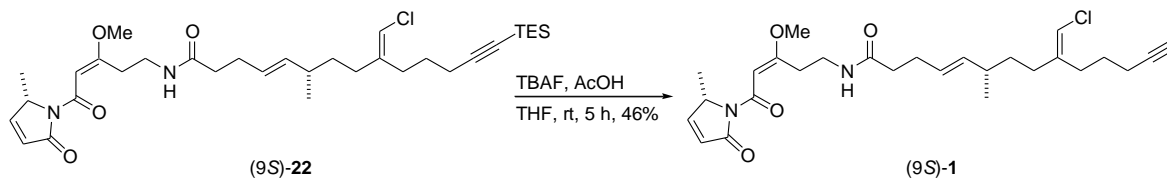

To a solution of (9*S*)-22 (3.5 mg, 5.8  $\mu\text{mol}$ , 1.0 equiv) in THF (232  $\mu\text{L}$ ) was added AcOH (0.58  $\mu\text{L}$ , 10.2  $\mu\text{mol}$ , 1.75 equiv) in THF (5.8  $\mu\text{L}$ ) and 1.0 M TBAF (10.2  $\mu\text{L}$ , 10.2  $\mu\text{mol}$ , 1.75 equiv). After stirring at rt for 5 h, the reaction mixture was concentrated *in vacuo*. Purification on silica gel column chromatography (hexane/EtOAc = 1/1) afforded (9*S*)-1 as a yellow oil (1.6 mg, 2.7  $\mu\text{mol}$ , 46%);  $R_f$  0.52 (hexane/EtOAc = 1:3);  $[\alpha]_D^{25} +1.5$  ( $c$  1.6, MeOH);  $^1\text{H NMR}$  (500 MHz,  $\text{CDCl}_3$ )  $\delta$  7.23-7.22 (1H, dd,  $J = 6.0, 2.2$  Hz, H22), 6.73 (1H, s, H18), 6.72 (1H, brs, NH), 6.09 (1H, dd,  $J = 6.0, 2.2$  Hz, H21), 5.79 (1H, s, H27), 5.39-5.33 (1H, dt,  $J = 9.2, 7.1$  Hz, H11), 5.28-5.27 (1H, dd,  $J = 9.2, 7.2$  Hz, H10), 4.87-4.85 (1H, m, H23), 3.75 (3H, s, Me), 3.52-3.49 (2H, m, H15), 3.00-2.84 (2H, m, H16), 2.31-2.26 (4H, m, H5/12), 2.22-2.16 (4H, m, H3/13), 2.04-1.99 (3H, m, H7/9), 1.66-1.60 (2H, m, H4), 1.50-1.47 (2H, d,  $J = 7.2$  Hz, H24), 1.39-1.31 (2H, m, H8), 1.00-0.94 (3H, m, H26); ESI-HRMS ( $m/z$ ) calcd for  $\text{C}_{27}\text{H}_{37}\text{ClN}_2\text{O}_4\text{Na}$   $[\text{M}+\text{Na}]^+$  511.23395, found 511.23433.

***N*-{19-[21,22-Dihydro-(23*S*)-methyl-20-oxo-pyrrolyl]-17-methoxy-19-oxo-pent-(17*E*)-enyl}-(6*E*)-chloromethylene-(10*E*)-ene-(9*R*)-methyl-tetradec-1-ynamide, (9*R*)-1:**

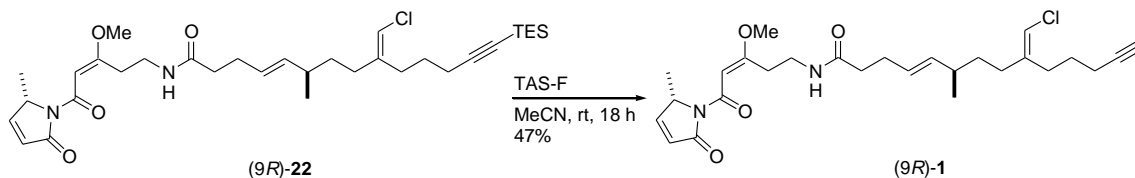

To a solution of (9*R*)-22 (1.01 mg, 1.65  $\mu\text{mol}$ , 1.0 equiv) in MeCN (56  $\mu\text{L}$ ) was added TAS-F (0.68 mg, 2.48  $\mu\text{mol}$ , 1.5 equiv) in MeCN (78  $\mu\text{L}$ ). After stirring at rt for 18 h, the reaction mixture was quenched with saturated  $\text{NH}_4\text{Cl}$  solution. The aqueous layer was then extracted with  $\text{CH}_2\text{Cl}_2$ . The combined organic layers were washed with brine, dried over  $\text{Na}_2\text{SO}_4$ , and concentrated *in vacuo*. Purification on silica gel column chromatography (hexane/EtOAc = 1/1) afforded (9*R*)-1 as a yellow oil (0.38 mg, 7.8  $\mu\text{mol}$ , 47%);  $R_f$  0.52 (hexane/EtOAc = 1:3);  $[\alpha]_D^{25} +43$  ( $c$  0.13, MeOH);  $^1\text{H}$  NMR (500 MHz,  $\text{CDCl}_3$ )  $\delta$  7.23-7.22 (1H, dd,  $J$  = 6.2, 1.9 Hz, H22), 6.73(1H, s, H18), 6.72 (1H, brs, NH), 6.09 (1H, dd,  $J$  = 5.9, 2.0 Hz, H21), 5.79 (1H, s, H27), 5.39-5.33 (1H, dt,  $J$  = 9.0, 6.9 Hz, H11), 5.28-5.27 (1H, dd,  $J$  = 9.0, 6.8 Hz, H10), 4.87-4.85 (1H, m, H23), 3.75 (3H, s, Me), 3.52-3.49 (2H, m, H15), 3.00-2.84 (2H, m, H16), 2.31-2.26 (4H, m, H5/12), 2.22-2.16 (4H, m, H3/13), 2.04-1.99 (3H, m, H7/9), 1.66-1.60 (2H, m, H4), 1.50-1.47 (2H, d,  $J$  = 7.6 Hz, H24), 1.39-1.31 (2H, m, H8), 1.00-0.94 (3H, d,  $J$  = 7.5 Hz, H26);  $^{13}\text{C}\{^1\text{H}\}$  NMR (125 MHz,  $\text{CDCl}_3$ )  $\delta$  175.3, 172.4, 170.0, 166.0, 153.0, 141.8, 136.5, 127.5, 125.8, 112.7, 94.9, 84.0, 68.5, 58.0, 56.0, 38.1, 36.7, 36.2, 34.7, 32.5, 32.3, 29.3, 28.5, 26.0, 20.7, 18.3, 17.8; ESI-HRMS ( $m/z$ ) calcd for  $\text{C}_{27}\text{H}_{37}\text{ClN}_2\text{O}_4\text{Na}$   $[\text{M}+\text{Na}]^+$  511.23395, found 511.23185.

File F:\JAMICA NMR\議論用\TAKAHIRO-EXP3  
 6-EVANS-PROTON-1-ALS  
 測定時の774名  
 Date 18-10-2021 11:31:56  
 Comment  
 34/takahiro-exp36-Evans  
 ObsNuc 1H  
 ExpMode single\_pulse.ex2  
 ObsFreq 500.16 MHz  
 ObsSet 2.41 kHz  
 ObsFine 6.0082 Hz  
 Point 13107  
 Frequency(Span) 7507.393 Hz  
 Scan 16  
 AcqTime 1.7458 s  
 PD 4.0 s  
 Temperature 21.4 °C  
 Solvent CDCl<sub>3</sub>  
 Reference 7.26 ppm  
 Broad.Factor 0.2864 Hz  
 RGain 44  
 Printed 2022/Jan/26 19:38:44  
 Operator

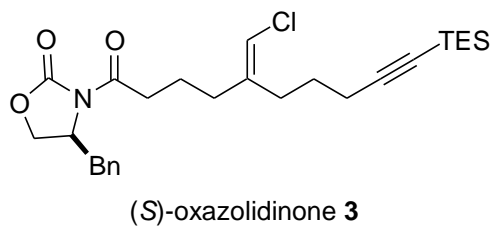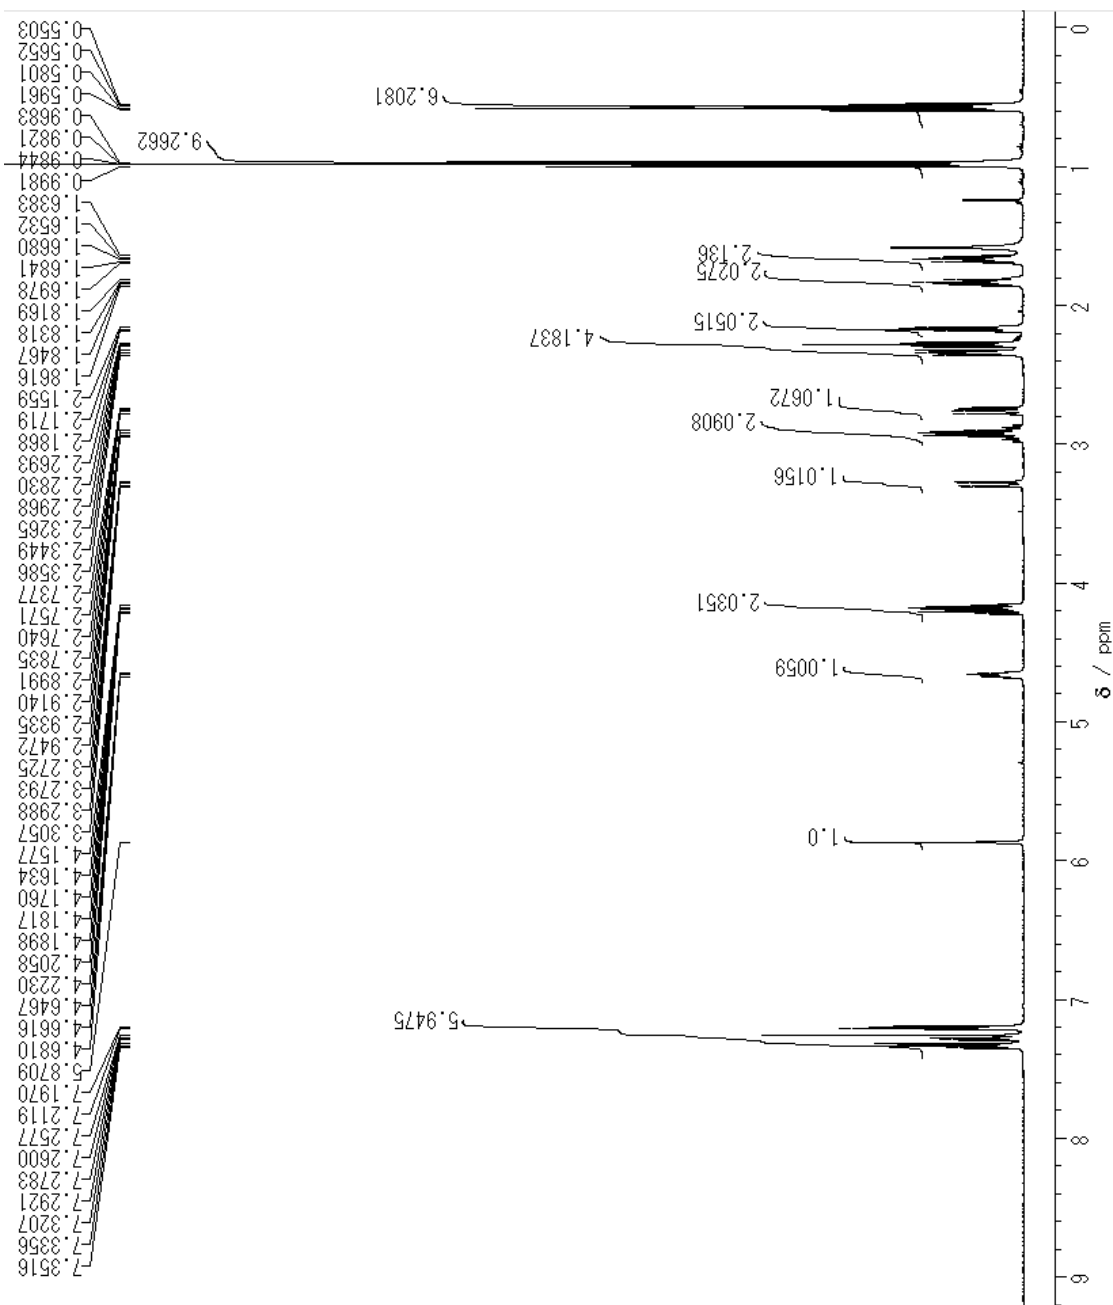



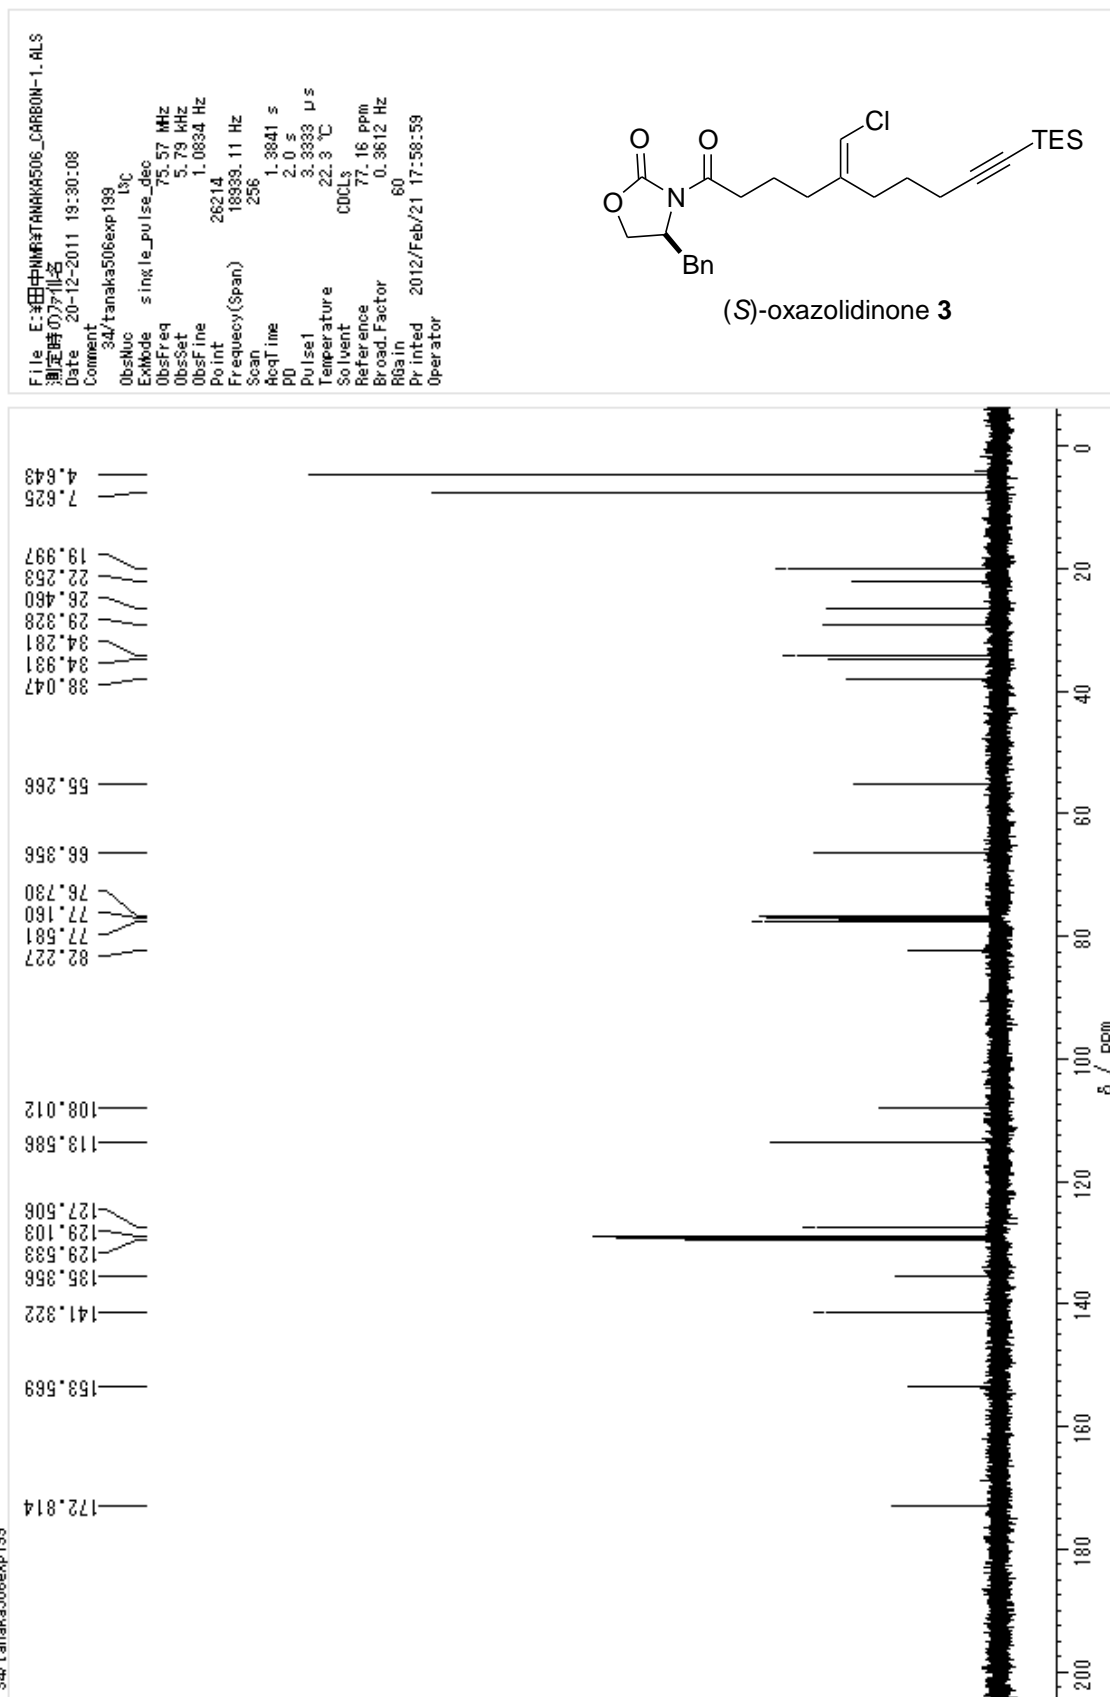



File F:\JAMAICA NMR\修論用\TAKAHIRO-EXP7  
 3-C-CARBON-6.NLS  
 測定時の77の値  
 Date 2022/Jan/13 12:09:38  
 Comment 34/takahiro-exp73-C  
 ObsNuc 13C  
 ExMode single\_pulse\_dec  
 ObsFreq 125.77 MHz  
 ObsSet -5.0 kHz  
 ObsFine 320.6217 Hz  
 Point 2824  
 Frequency(Span) 31444.86 Hz  
 Sca1 1024  
 AcqTime 0.834 s  
 PD 2.0 s  
 Pulse1 4.1917  $\mu$ s  
 Temperature 22.6  $^{\circ}$ C  
 Solvent CHLOROFORM-D  
 Reference 77.16 ppm  
 Broad.Factor 0.25 Hz  
 RGain 48  
 Printed 2022/Jan/28 12:42:06  
 Operator

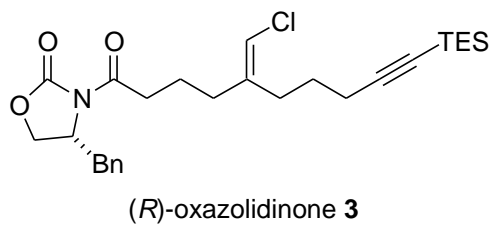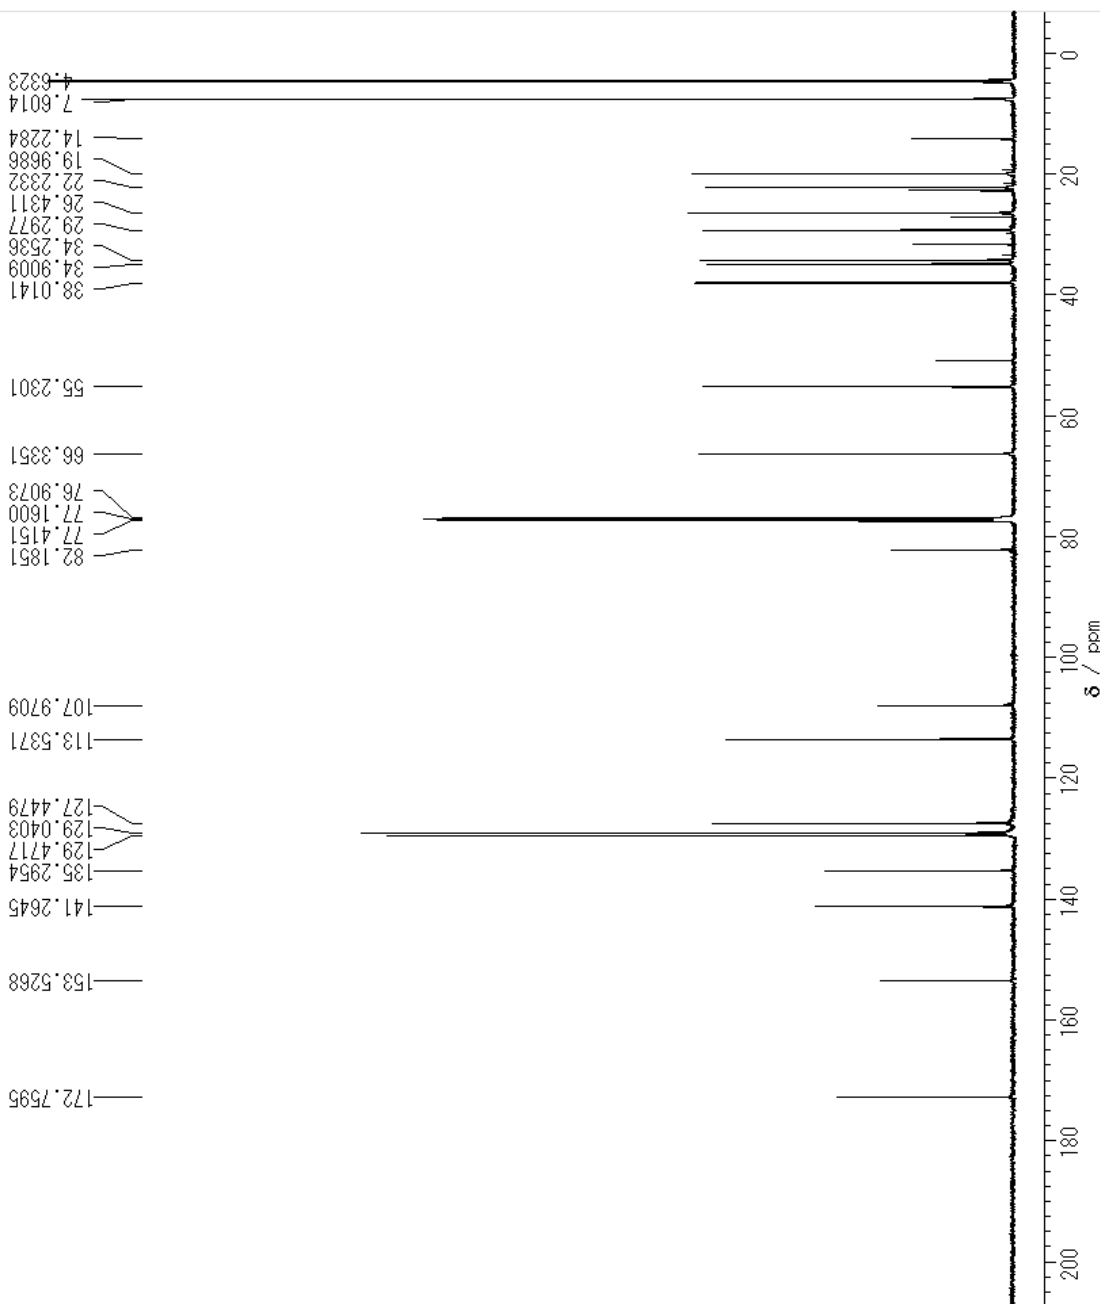

File F:\JAMATICA NMR\修論用\TAKAHIRO-EXP3  
 8-METHYLATION-PROTON-1ALS  
 測定時のファイル名  
 Date 12-10-2021 14:21:10  
 Comment 34/takahiro-methylation-exp38  
 ObsNuc 1H  
 ExMode single\_pulse.ex2  
 ObsFreq 500.16 MHz  
 ObsSet 2.41 kHz  
 ObsFine 6.0082 Hz  
 Point 13107  
 Frequency(Span) 7507.388 Hz  
 Scan 16  
 AcqTime 1.7459 s  
 PD 4.0 s  
 Pulse1 6.02 μs  
 Temperature 22.7 °C  
 Solvent CDCl<sub>3</sub>  
 Reference 7.26 ppm  
 Broad.Factor 0.2864 Hz  
 RGain 40  
 Printed 2022/Jan/26 18:47:42  
 Operator

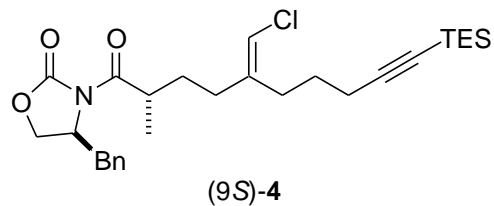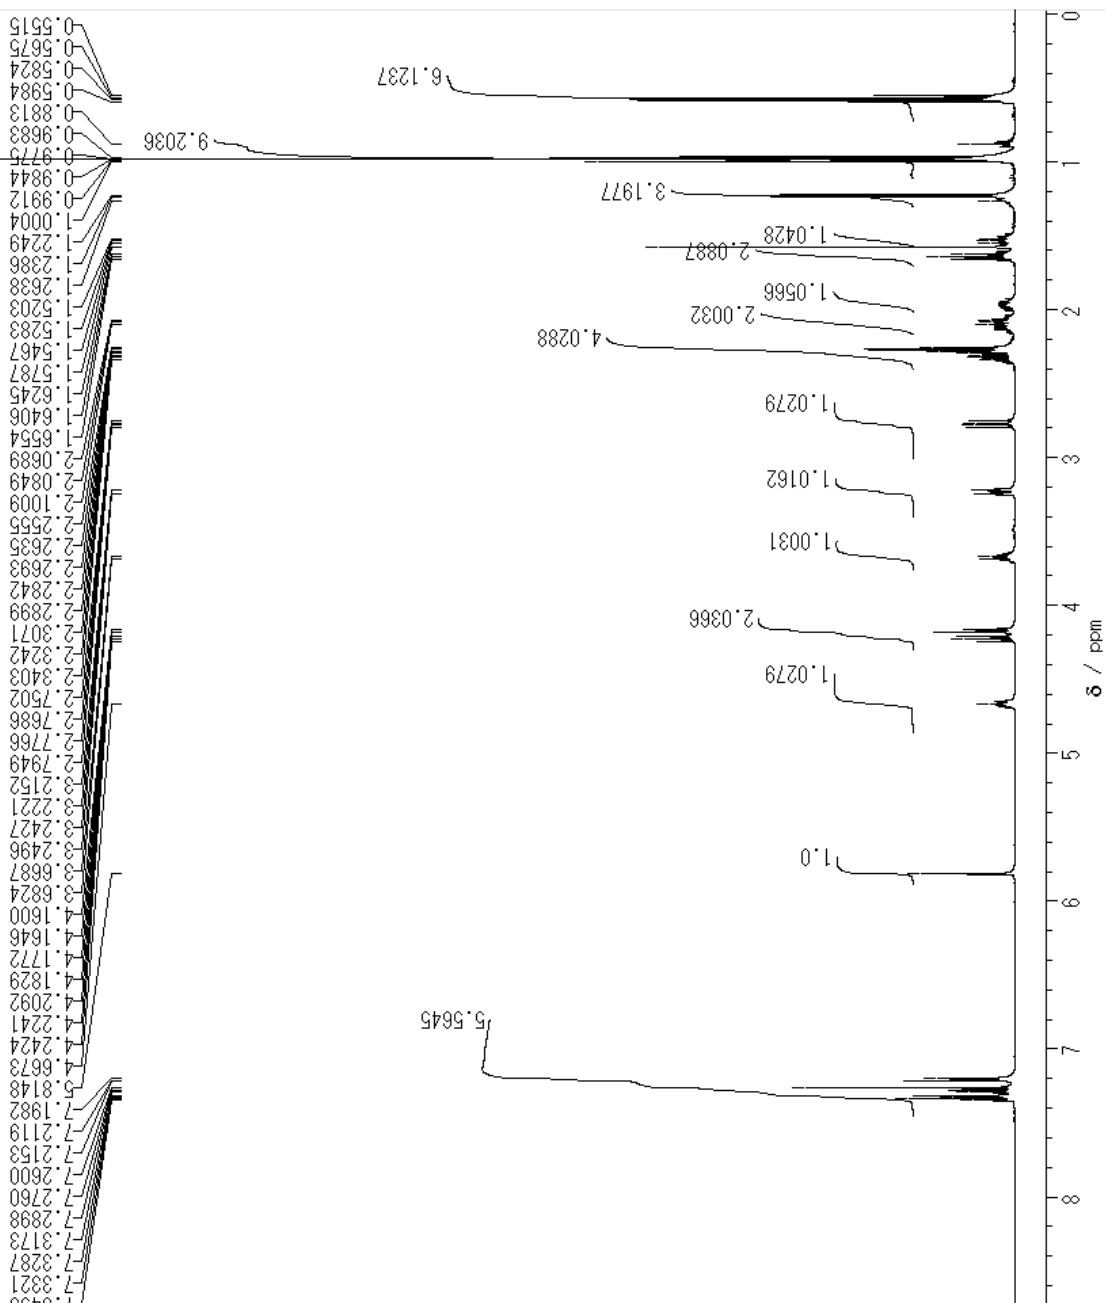

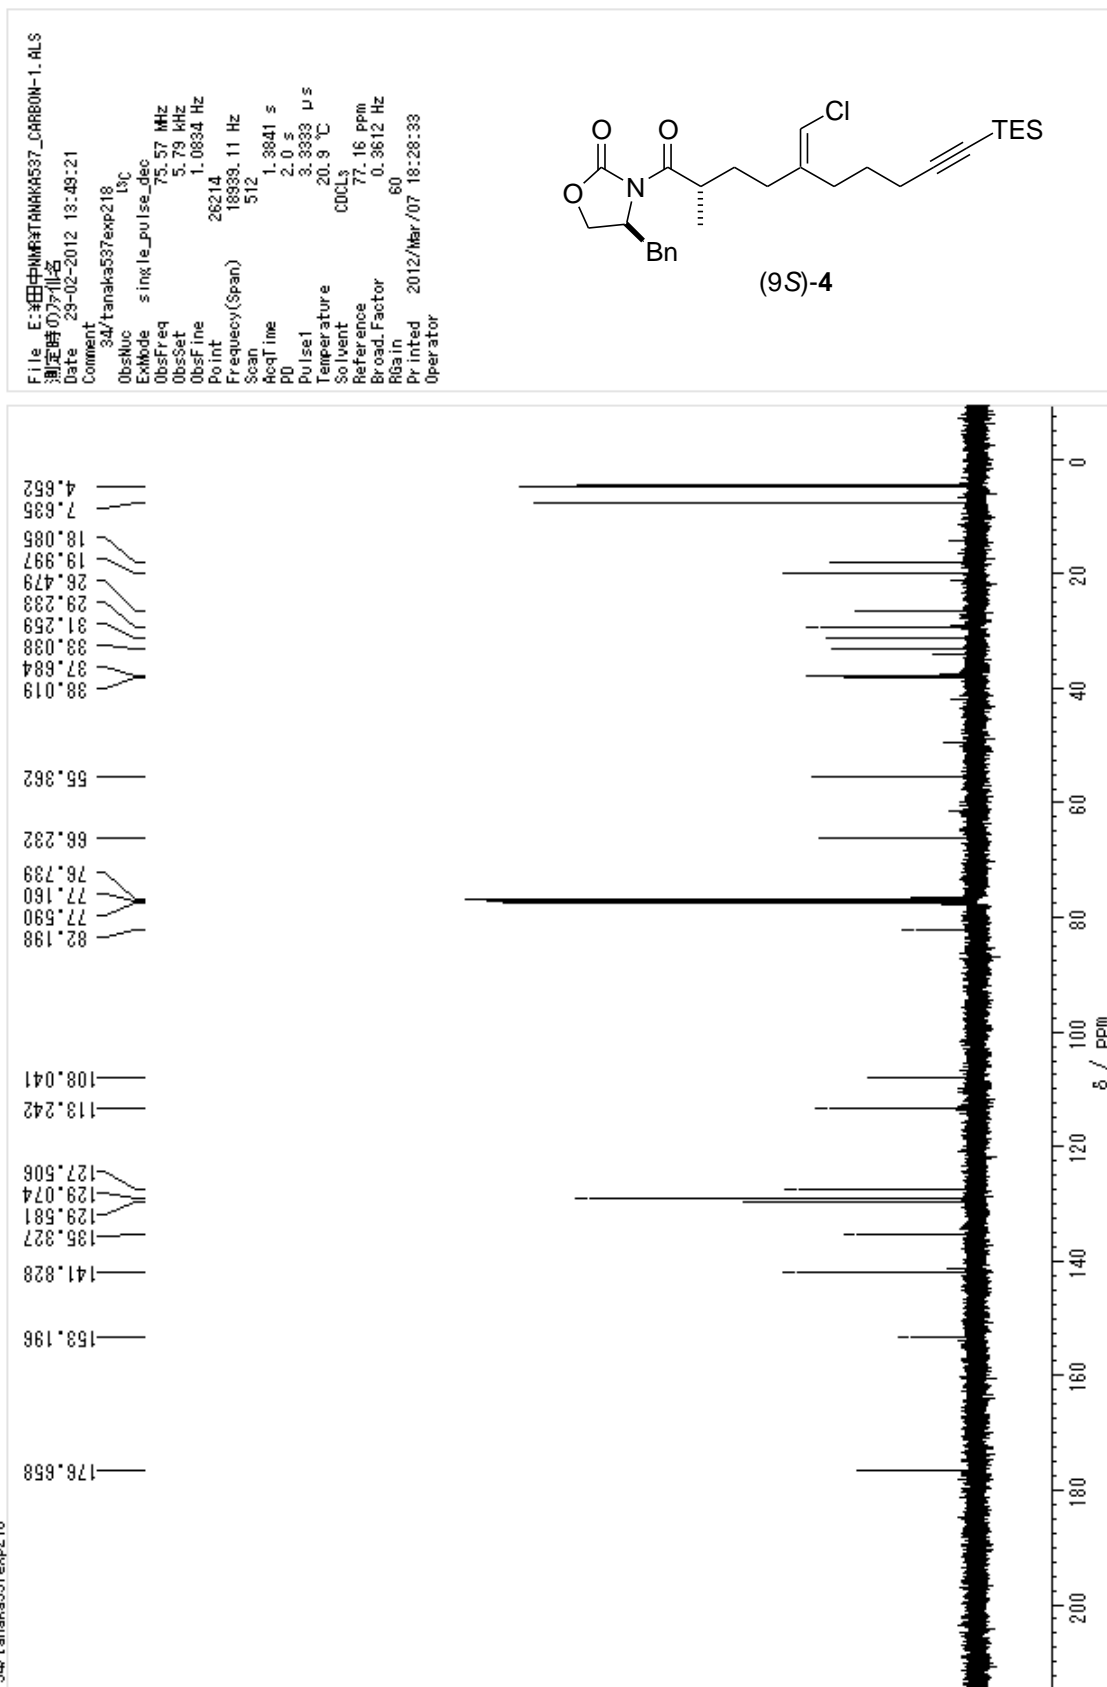

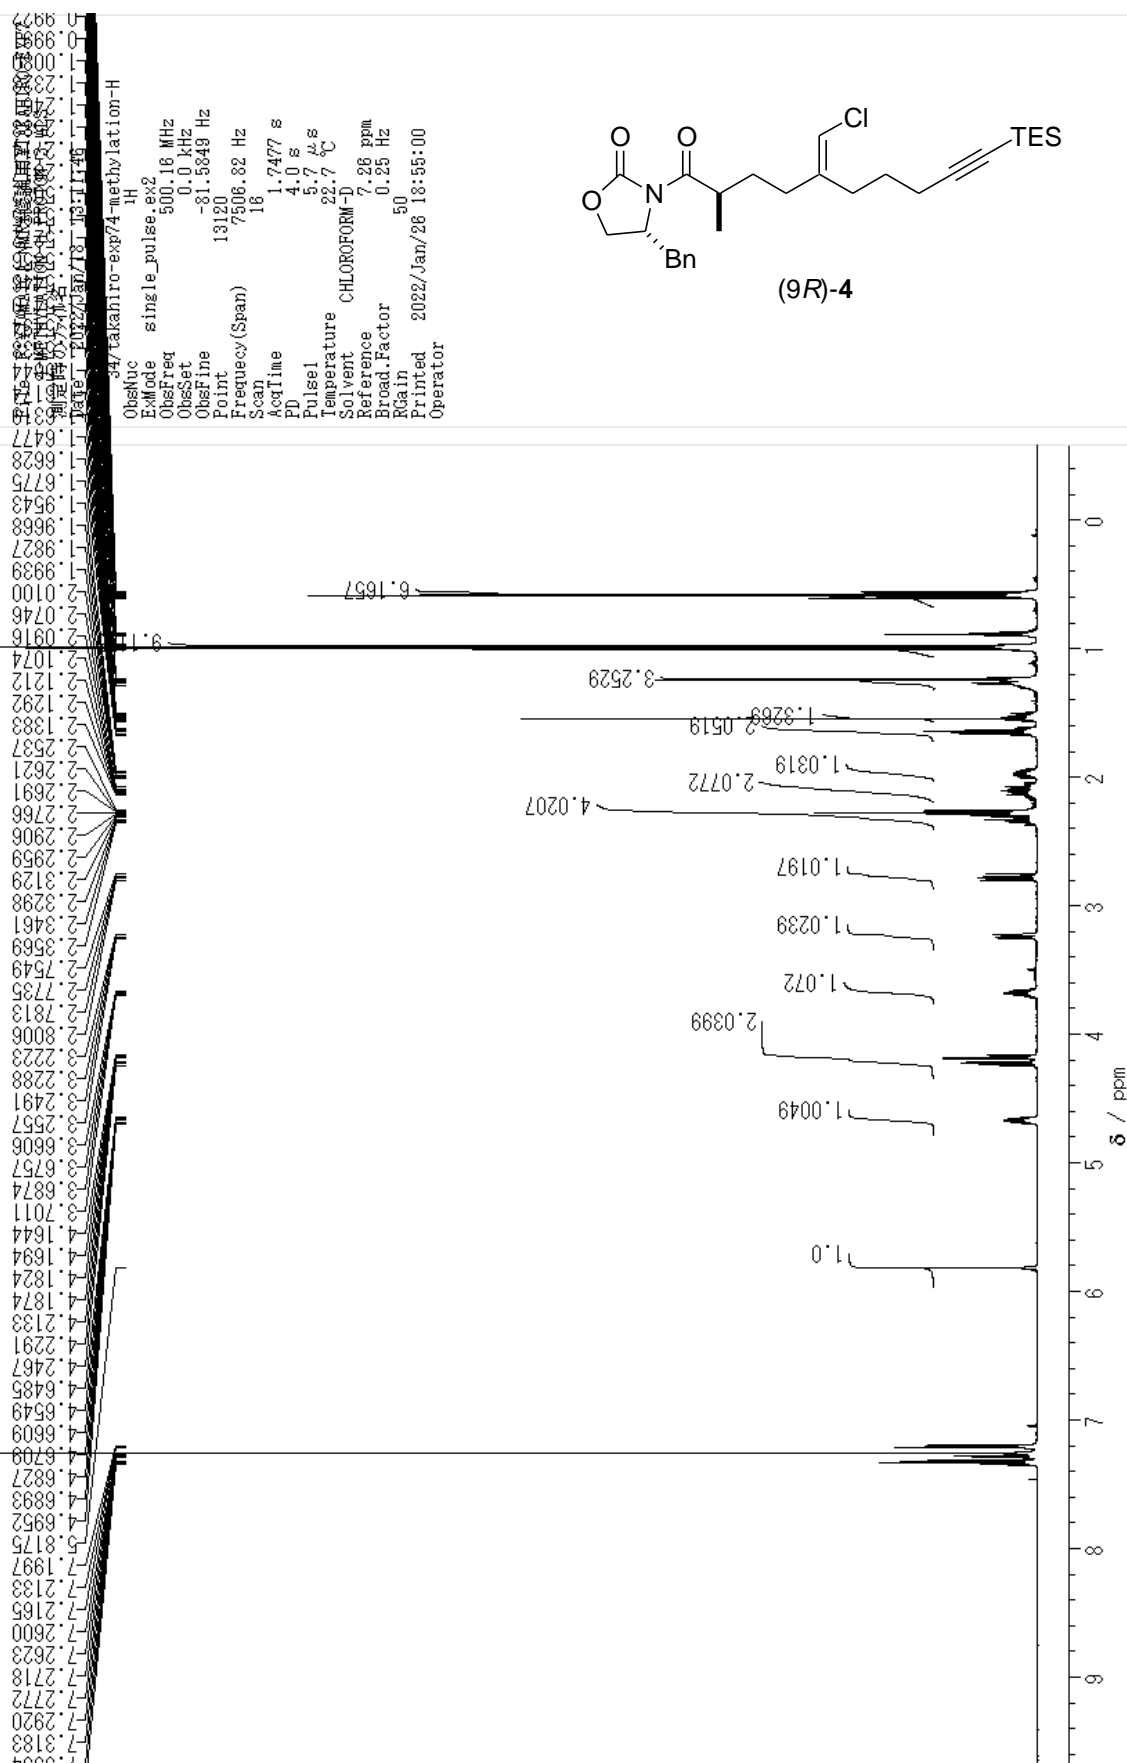

File F:\JAMATECA NMR\修論用\TAKAHIRO-EXP7  
 4-METHYLATION-C\_CARBON-3\_ALS  
 測定時の7名  
 Date 2022/Jan/18 14:07:33  
 Comment 34/takahiro-exp74-methylation-C  
 ObsNuc <sup>13</sup>C  
 ExMode single\_pulse\_dec  
 ObsFreq 125.77 MHz  
 ObsSet -5.0 kHz  
 ObsFine 314.6243 Hz  
 Point 26224  
 Frequency(Span) 31444.86 Hz  
 Scan 1024  
 AcqTime 0.834 s  
 PD 2.0 s  
 Pulse 4.1817 μs  
 Temperature 22.8 °C  
 Solvent CHLOROFORM-D  
 Reference 77.16 ppm  
 Broad.Factor 0.25 Hz  
 RGain 50  
 Printed 2022/Jan/28 12:45:40  
 Operator

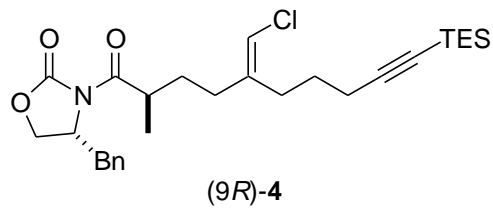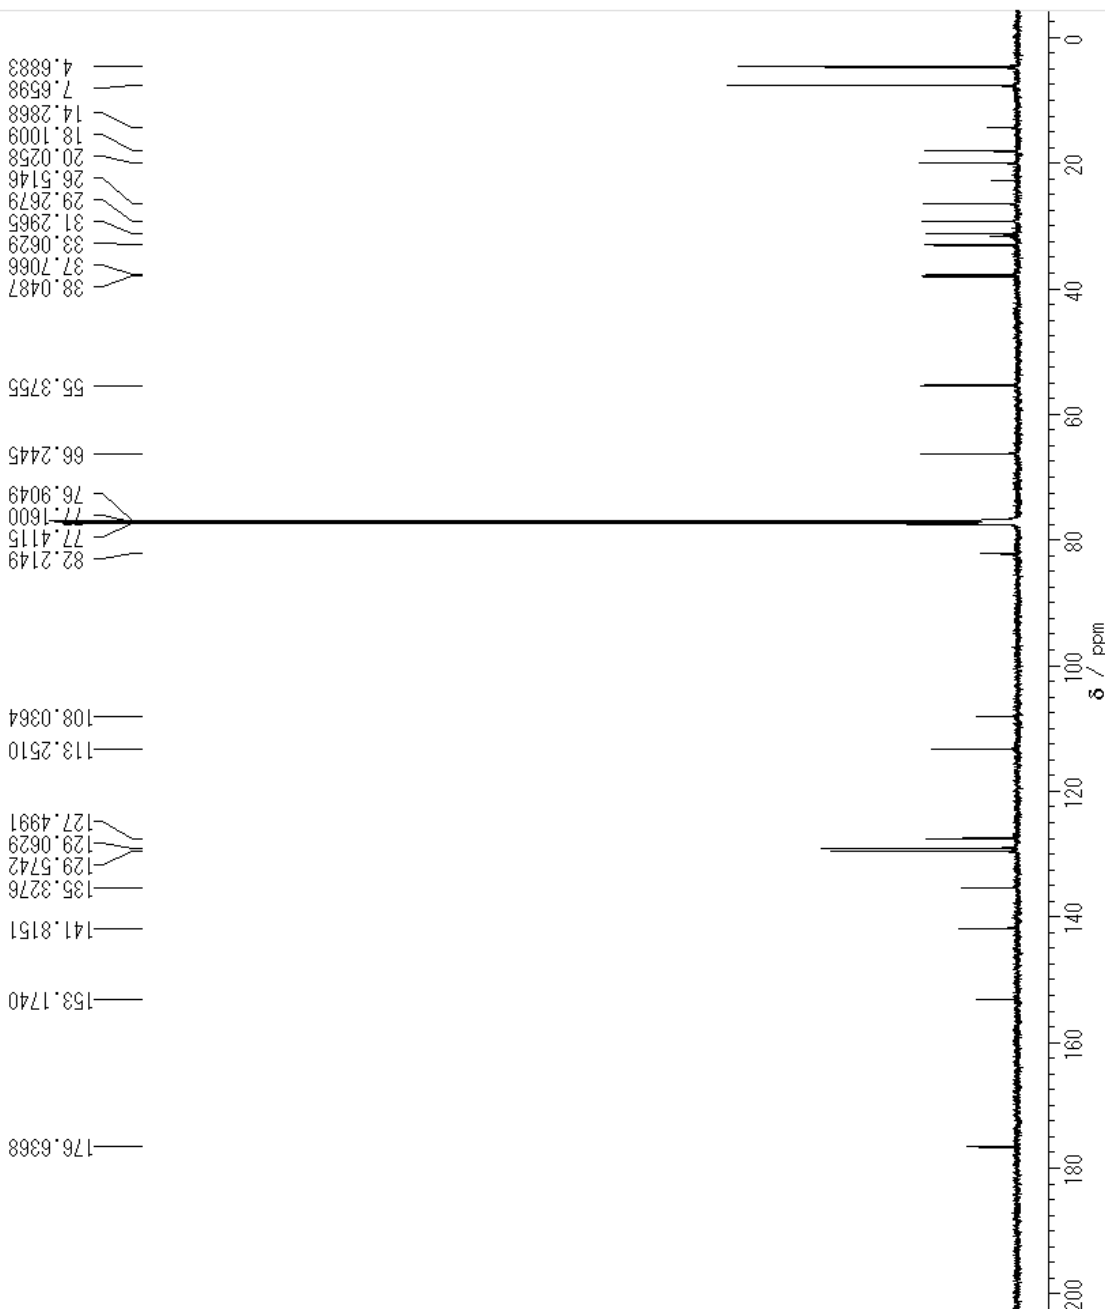

File F:\JAMATCA NMR\修論用\TAKAHIRO-EXP3  
 9-LIBH4-1.ALS  
 測定時のファイル名  
 Date 12-10-2021 21:07:50  
 Comment 34/takahiro-LIBH4-exp38  
 ObsNuc 1H  
 ExMode single\_pulse.ex2  
 ObsFreq 500.16 MHz  
 ObsSet 2.41 kHz  
 ObsFine 6.0082 Hz  
 Point 13107  
 Frequency(Span) 7507.393 Hz  
 Scan 16  
 AcqTime 1.7459 s  
 FD 5.0 s  
 Pulse1 6.02 μs  
 Temperature 22.5 °C  
 Solvent CDCl<sub>3</sub>  
 Reference 7.26 ppm  
 Broad.Factor 0.2864 Hz  
 RGain 38  
 Printed 2022/Jan/26 19:02:19  
 Operator

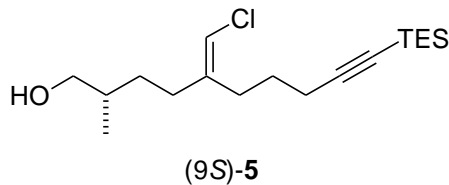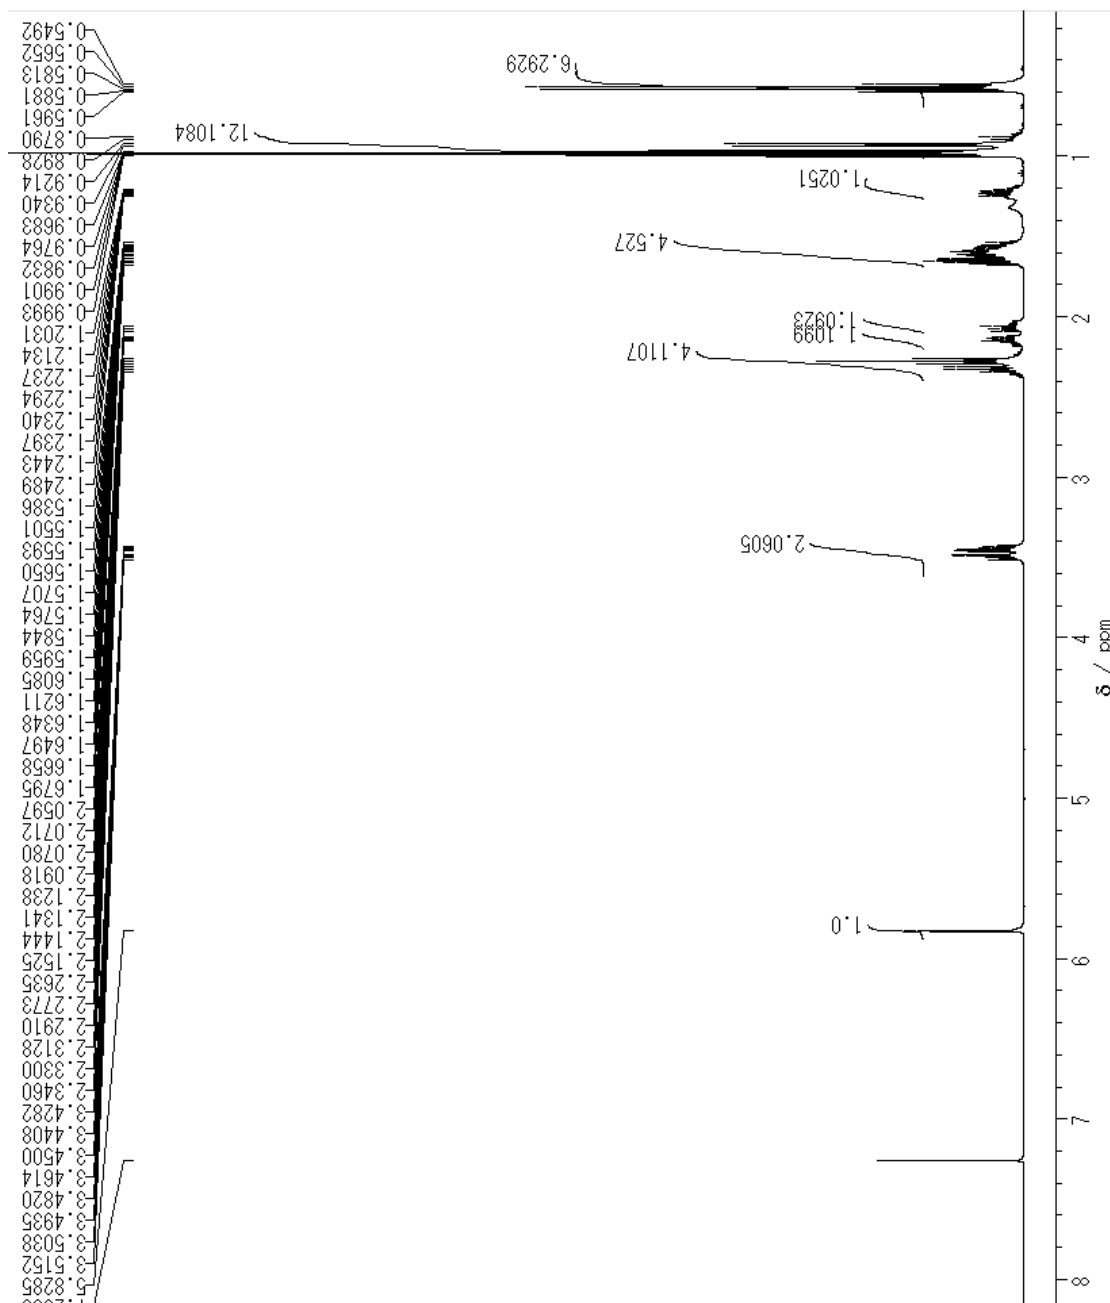



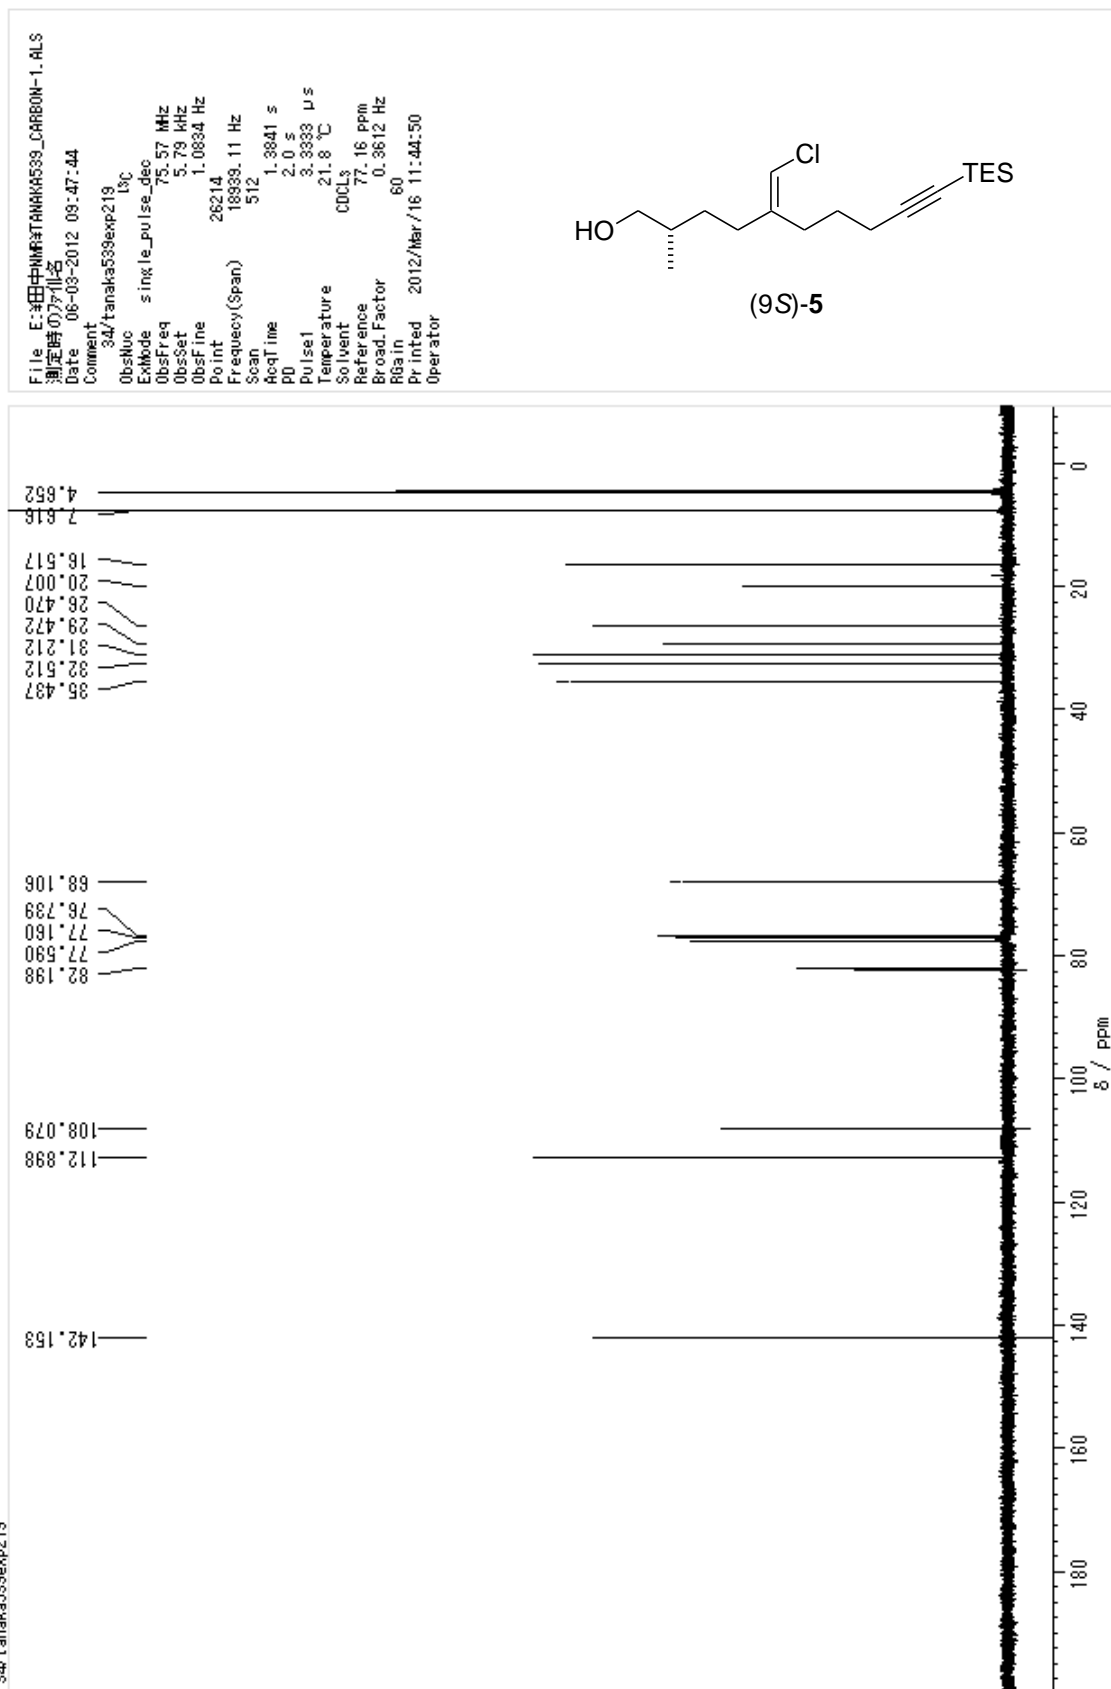

F:\JAMAICA NMR\討論用\TAKAHIRO-EXP7  
 8-LIBH4-H PROTON-3-ALS  
 2022/1/18 18:53:35  
 Comment 34/takahiro-exp76-LIBH4-H  
 ObsNuc 1H  
 ExpMode single\_pulse.ex2  
 ObsFreq 500.16 MHz  
 ObsSet 0.0 kHz  
 ObsFine -81.5849 Hz  
 Point 13180  
 Frequency(Span) 7506.82 Hz  
 Scap 16  
 AcqTime 1.7477 s  
 PD 4.0 s  
 Pulse 5.7 μs  
 Temperature 22.5 °C  
 Solvent CHLOROFORM-D  
 Reference 7.26 ppm  
 Broad.Factor 0.25 Hz  
 RGain 44  
 Printed 2022/Jan/26 18:08:08  
 Operator

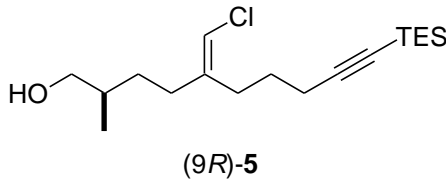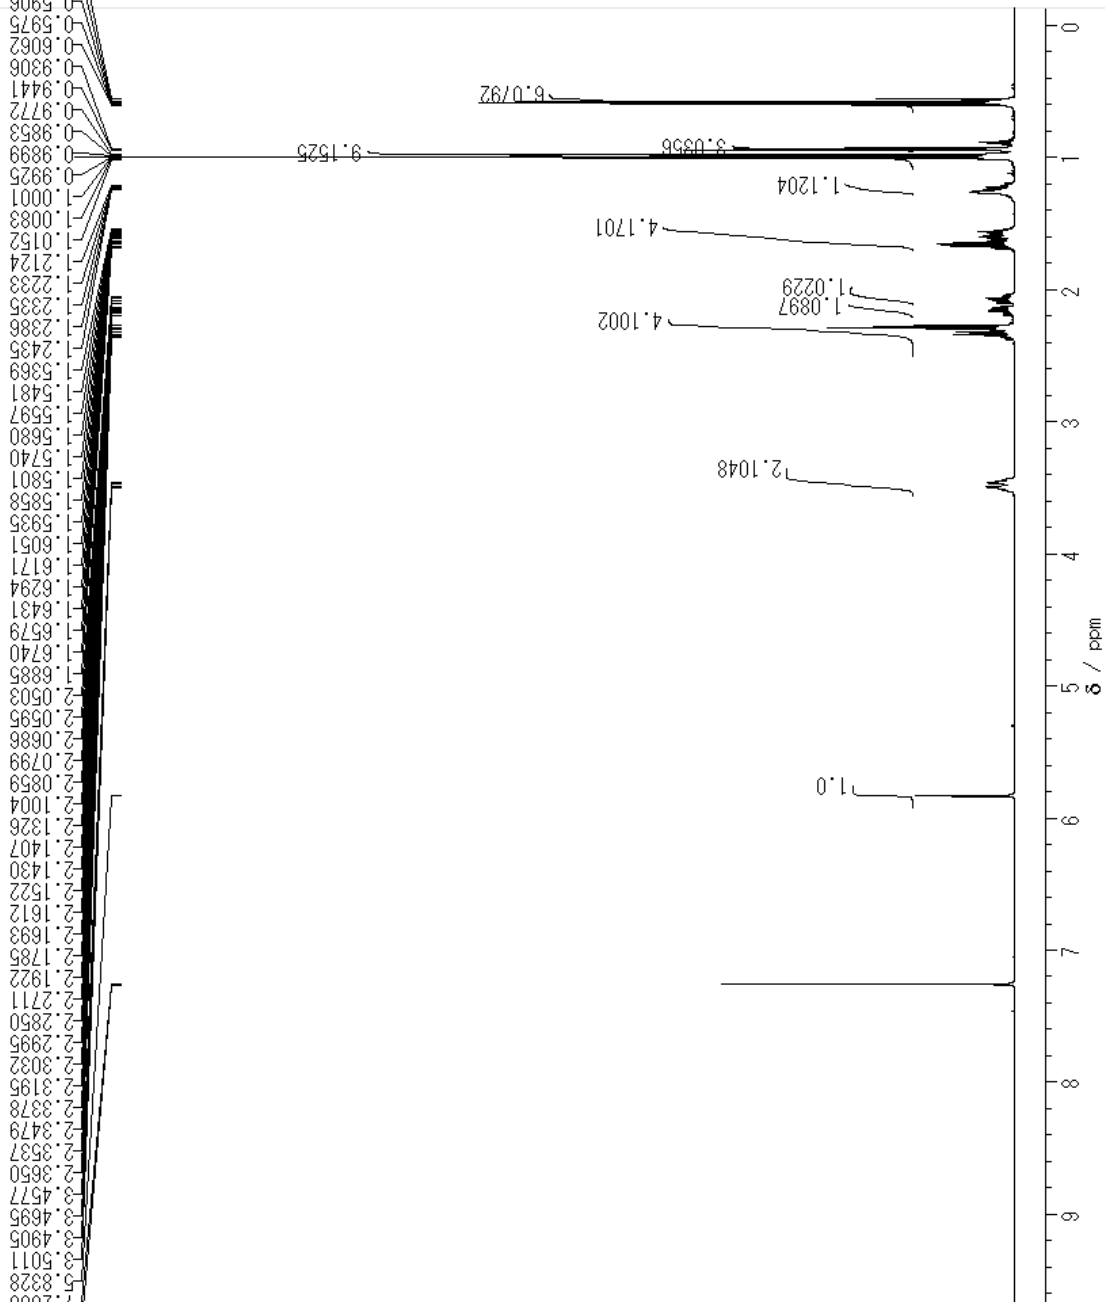

File: F:\JAMICA NMR\編用\TAKAHIRO-EXP7  
 6-LiBH4-C CARBON-3 ALS  
 測定時の7分名  
 Date: 2022/Jan/18 19:48:20  
 Comment: 34/takahiro-exp76-LiBH4-C  
 ObsNuc: 1x1  
 ExMode: single\_pulse\_dec  
 ObsFreq: 125.77 MHz  
 ObsSet: -5.0 kHz  
 ObsFine: 313.4247 Hz  
 Point: 26224  
 Frequency(Span): 31444.86 Hz  
 Scan: 1024  
 AcqTime: 0.834 s  
 PD: 2.0 g  
 Pulse1: 4.1817  $\mu$ s  
 Temperature: 23.2  $^{\circ}$ C  
 Solvent: CHLOROFORM-D  
 Reference: 77.16 ppm  
 Broad.Factor: 0.25 Hz  
 KGain: 52  
 Printed: 2022/Jan/28 12:48:52  
 Operator:

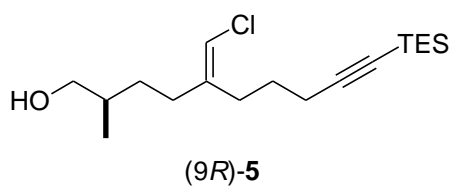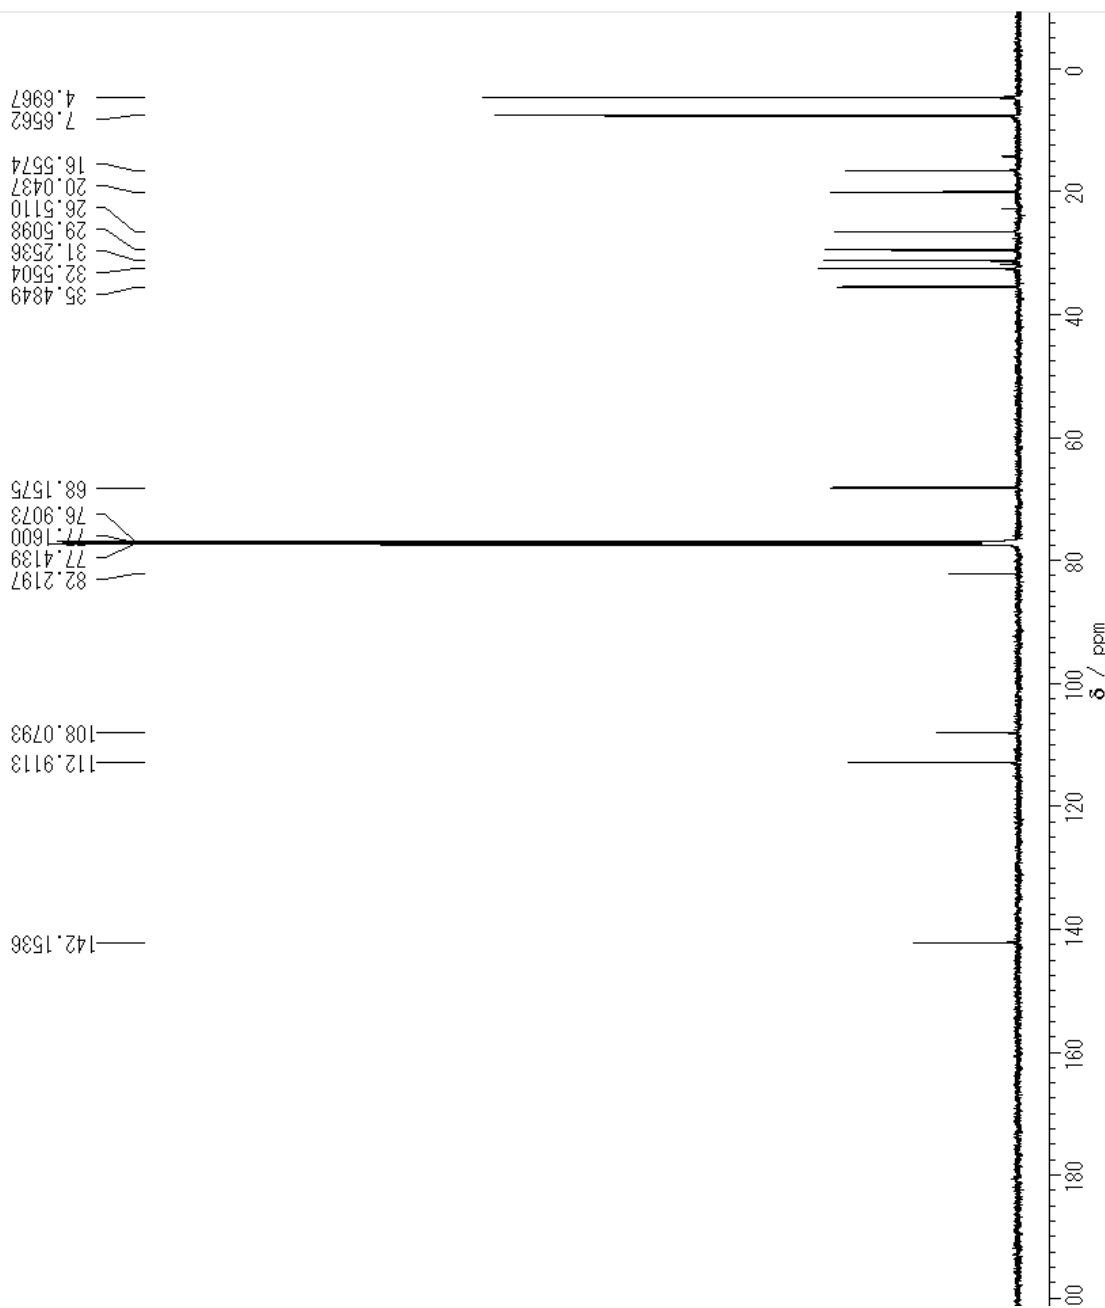

File F:\JAMATICA NMR\議論用\TAKAHIRO-EXP5  
 8-IBX PROTON-3\_ALS  
 測定時刻 7:42  
 Date 2021/Nov/29 12:13:36  
 Comment 34/takahiro-exp58-IBX  
 ObsNuc 1H  
 ExMode single\_pulse.ex2  
 ObsFreq 500.16 MHz  
 ObsSet 0.0 kHz  
 ObsFine -81.5849 Hz  
 Point 13120  
 Frequency(Span) 7506.82 Hz  
 Scan 16  
 AcqTime 1.7477 s  
 PD 4.0 s  
 Pulse1 5.7  $\mu$ s  
 Temperature 21.2  $^{\circ}$ C  
 Solvent CHLOROFORM  
 Reference 7.26 ppm  
 Broad.Factor 0.2861 Hz  
 RGain 50  
 Printed 2022/Jan/26 19:15:36  
 Operator

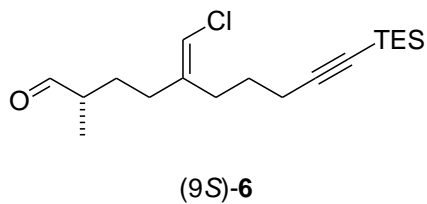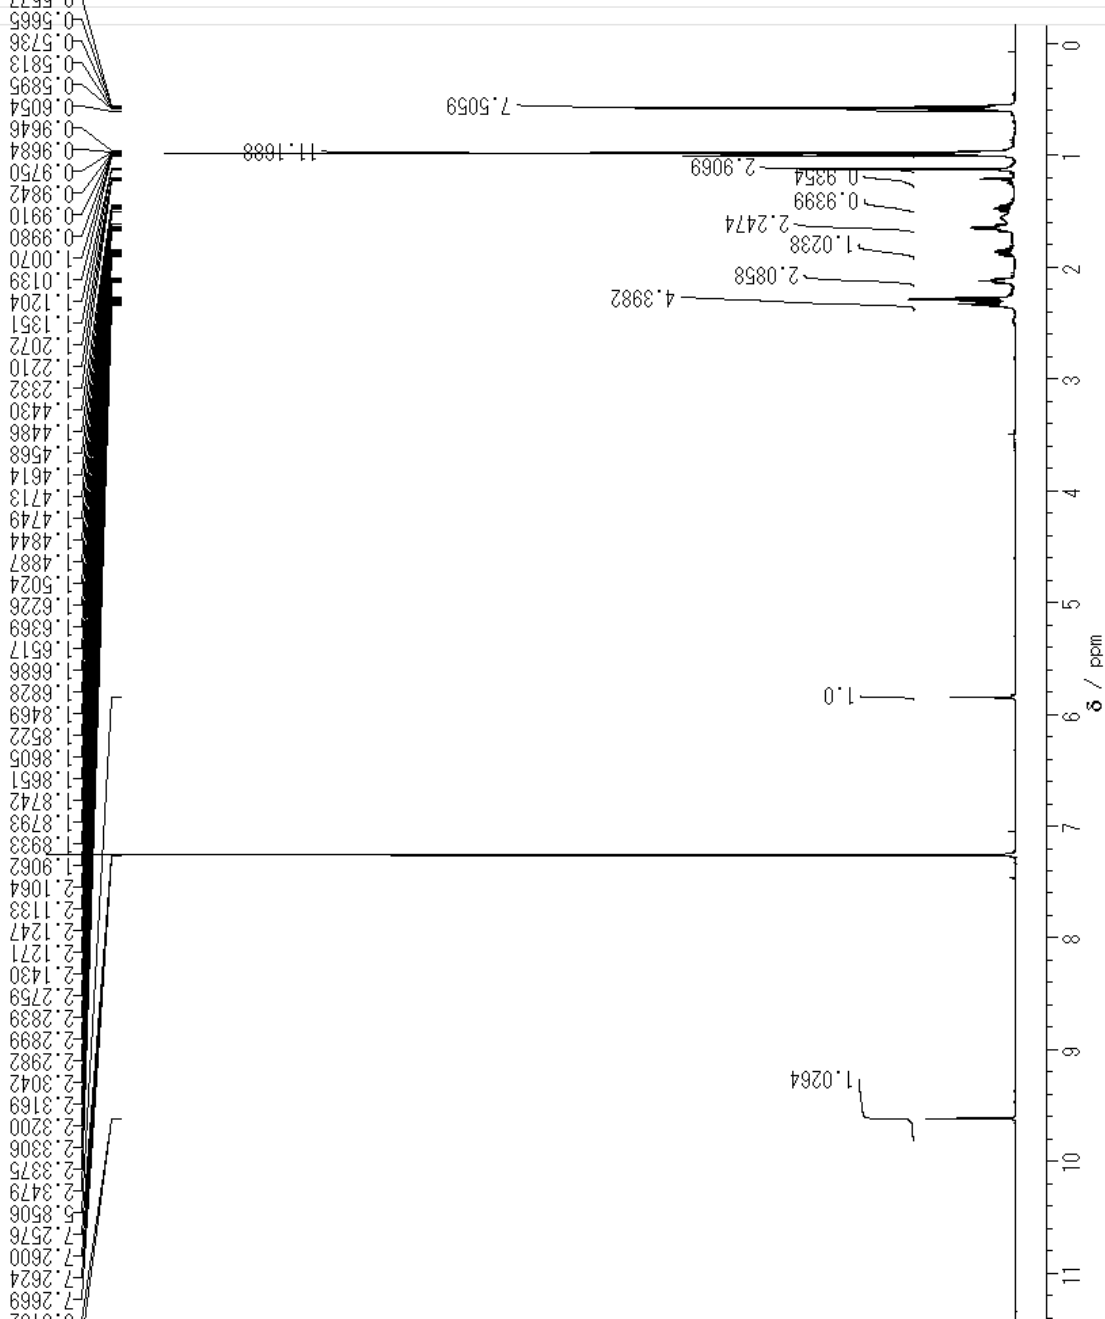

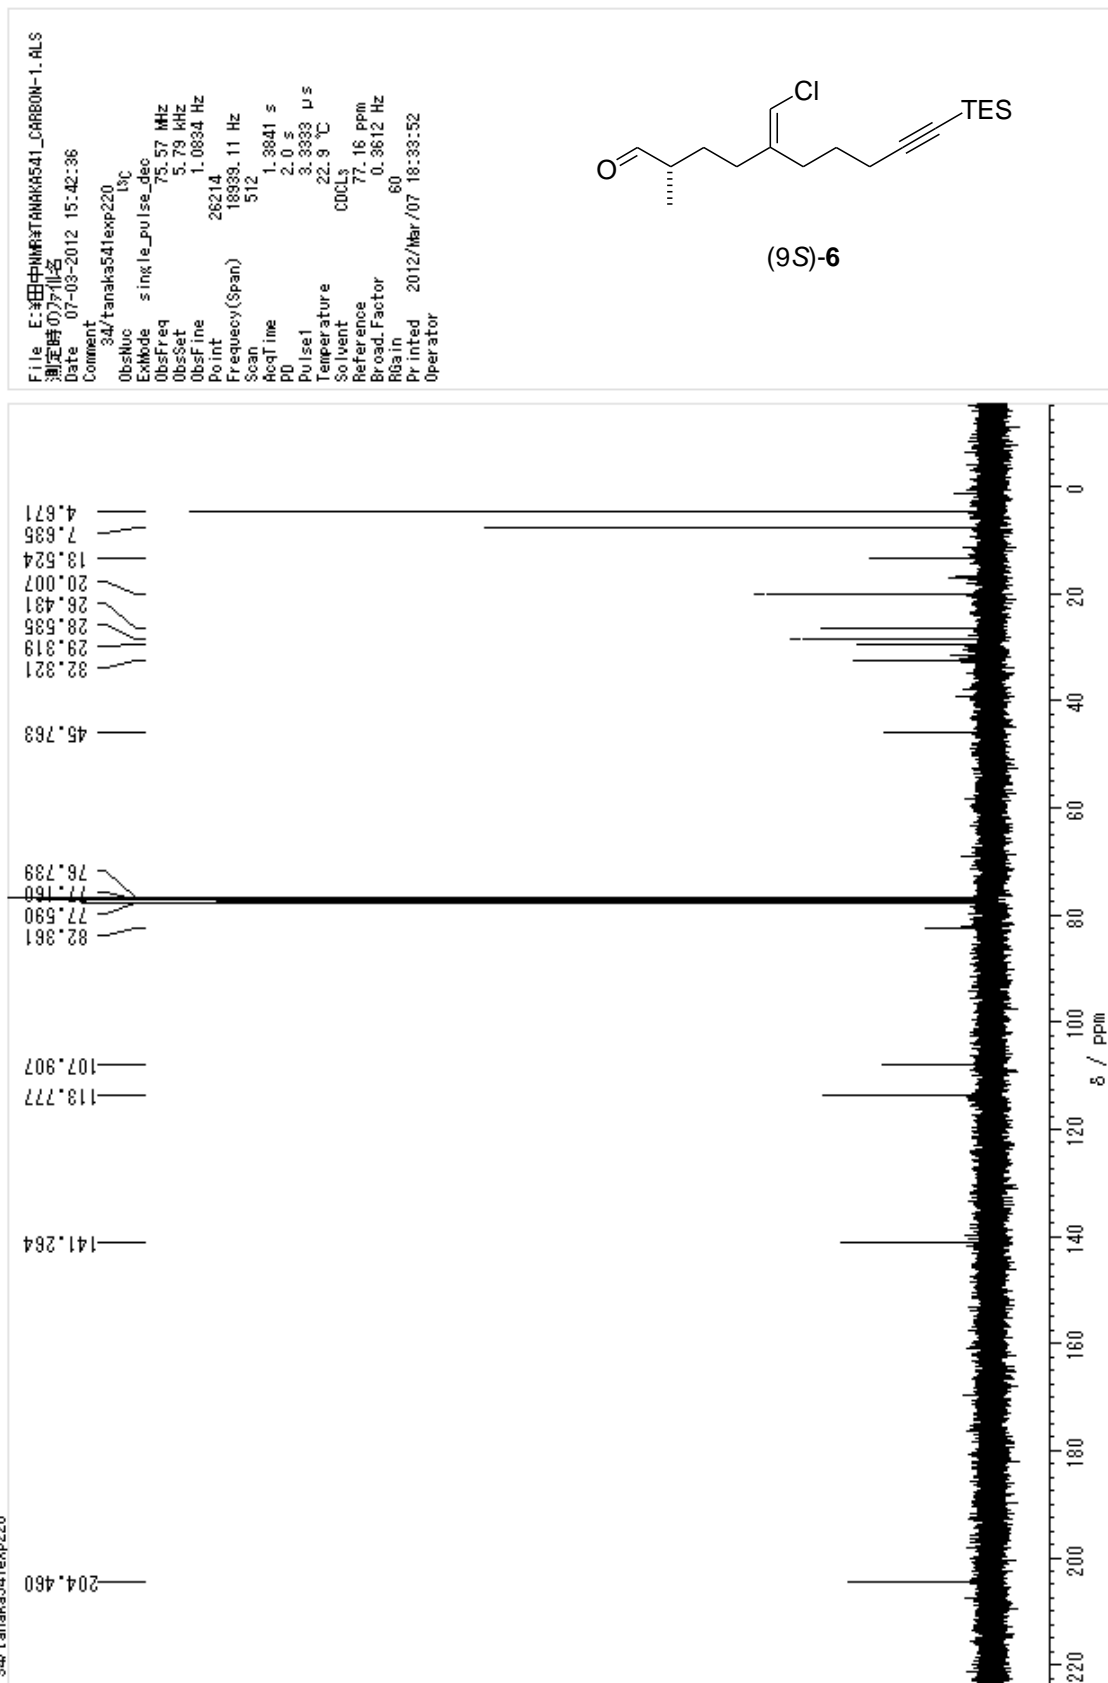

File F:\JAMAICA NMR討論用\TAKAHIRO-EXP7  
 9-IBX\_PROTON-4.MLS  
 測定時の文件名  
 Date 2022/Jan/19 15:35:01  
 Comment 34/takahi-ro-exp78-IBX  
 ObsNuc 1H  
 ExMode single\_pulse.ex2  
 ObsFreq 500.16 MHz  
 ObsSet 0.0 kHz  
 ObsFine -81.5848 Hz  
 Point 13120  
 Frequency(Span) 7506.82 Hz  
 Scan 16  
 AcqTime 1.7477 s  
 PD 4.0 s  
 Pulse 5.7  $\mu$ s  
 Temperature 22.8  $^{\circ}$ C  
 Solvent CHLOROFORM-D  
 Reference 7.26 ppm  
 Broad.Factor 0.25 Hz  
 RGain 40  
 Printed 2022/Jan/26 18:23:19  
 Operator

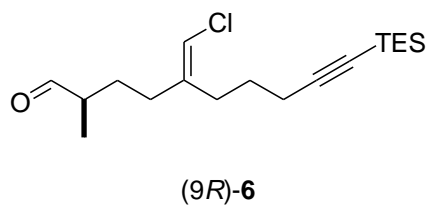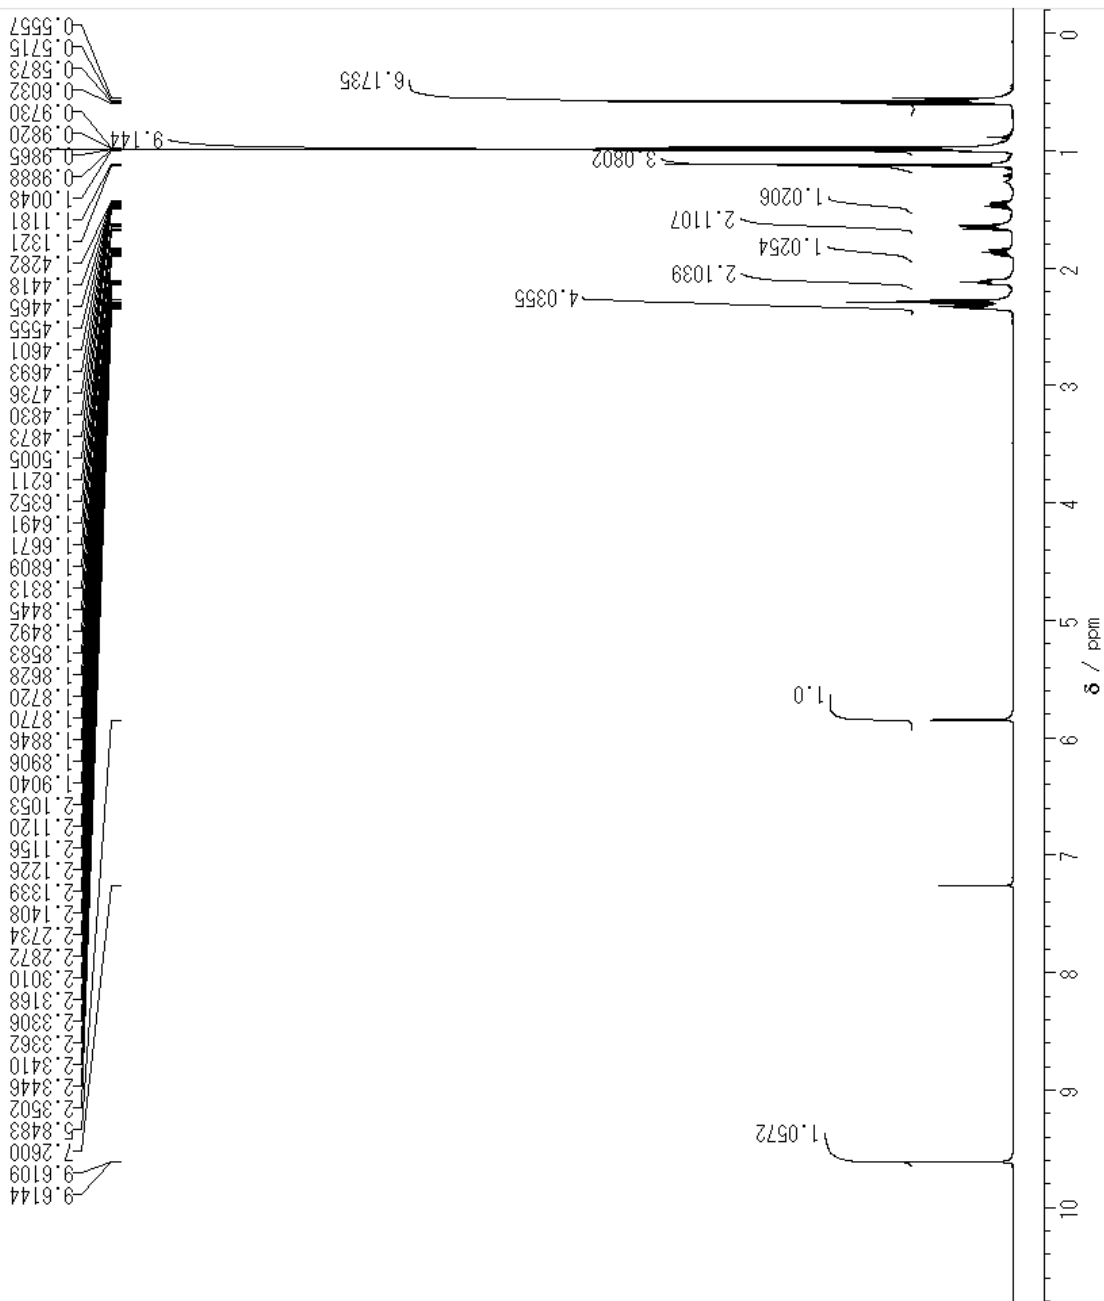

File F:\JAMICA NMR\議論用\TAKAHIRO-EXP7  
 測定時の77zの石  
 Date 2022/Jan/18 16:24:52  
 Comment 34/takahiro-exp79-IBX  
 ObsKuc 1x1  
 ExMode single\_pulse\_dec  
 ObsFreq 125.77 MHz  
 ObsSet -5.0 kHz  
 ObsPine 313.4247 Hz  
 Point 26224  
 Frequency(Span) 31444.86 Hz  
 Scan 1024  
 AcqTime 0.834 s  
 PD 2.0 s  
 Pulse 4.1817  $\mu$ s  
 Temperature 23.2  $^{\circ}$ C  
 Solvent CHLOROFORM-D  
 Reference 77.16 ppm  
 Broad.Factor 0.25 Hz  
 RGain 50  
 Printed 2022/Jan/28 12:58:29  
 Operator

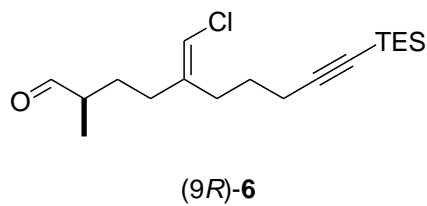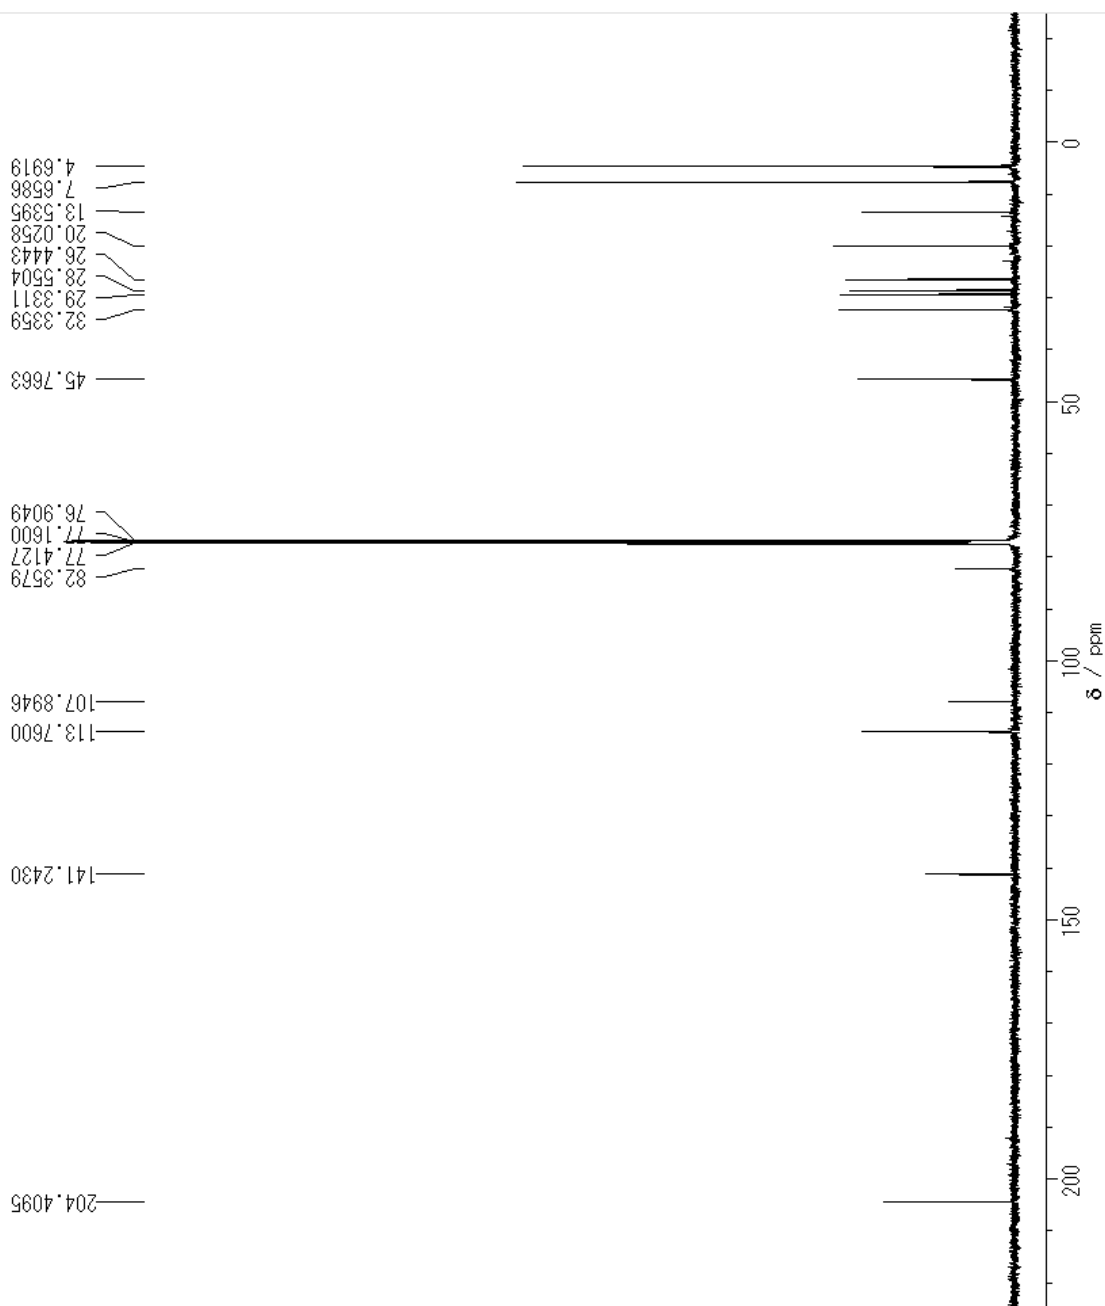

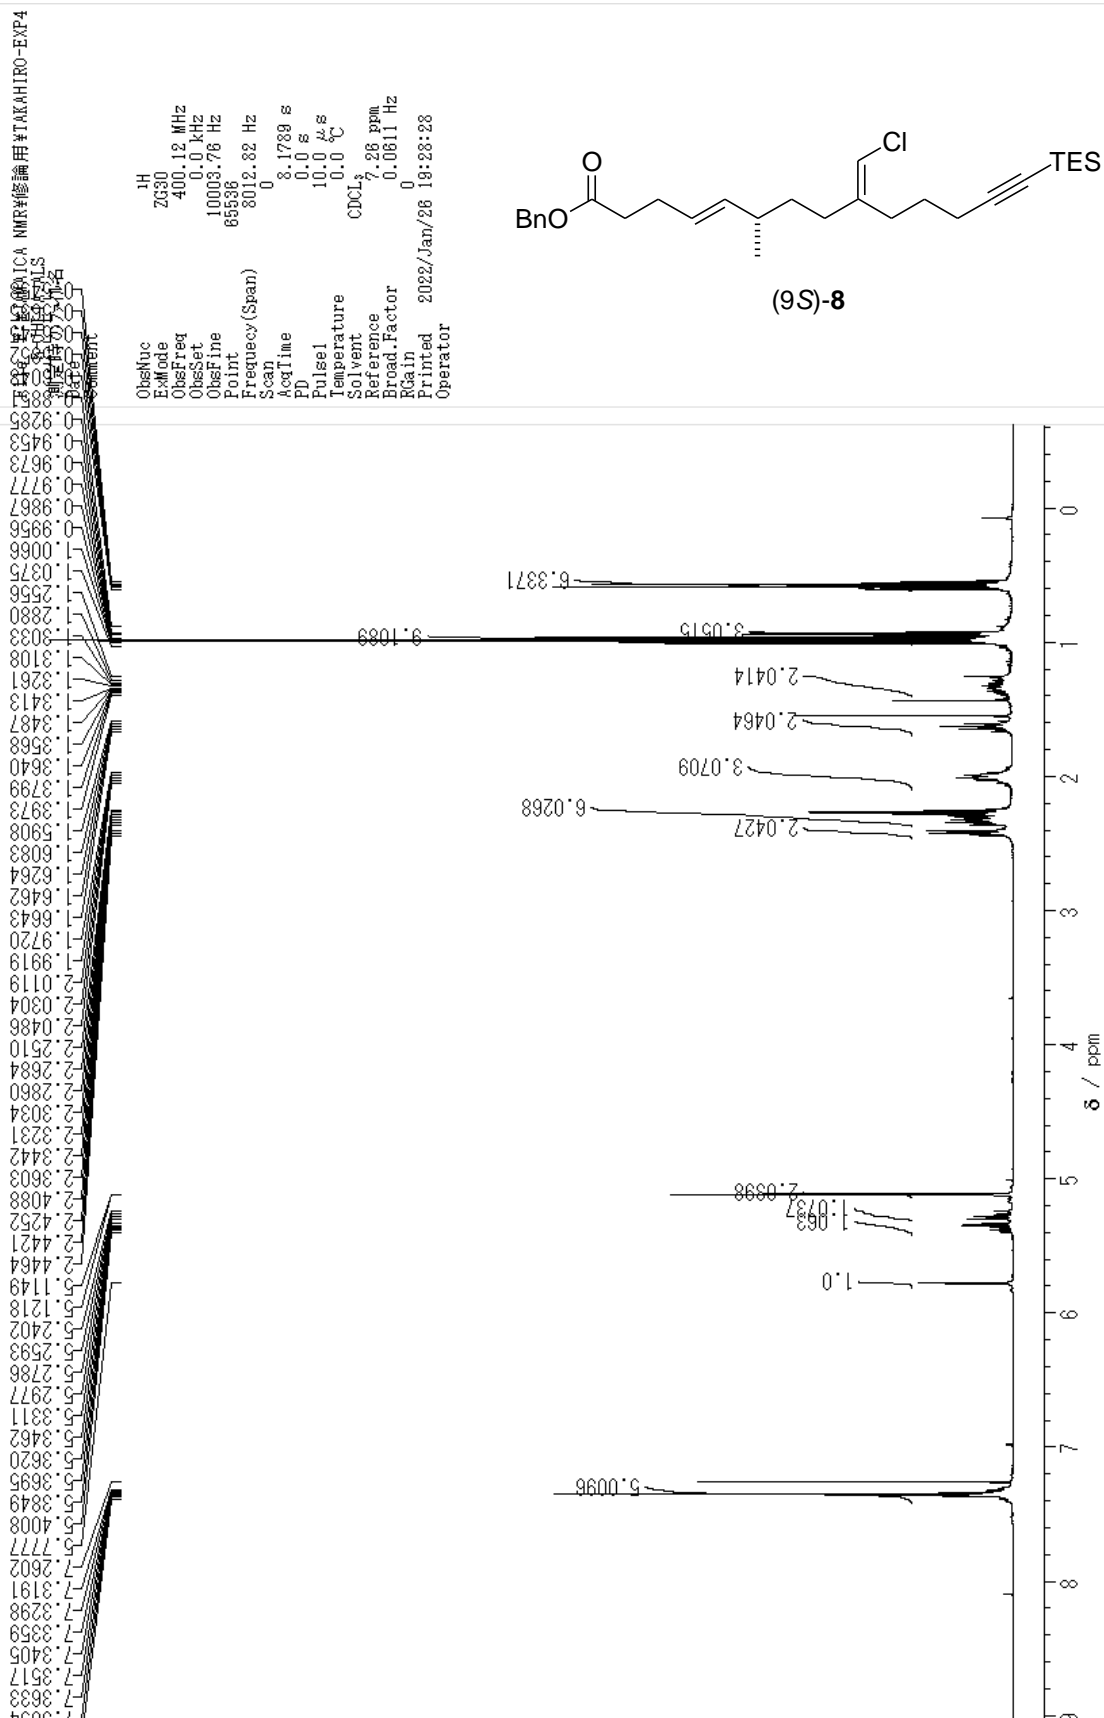



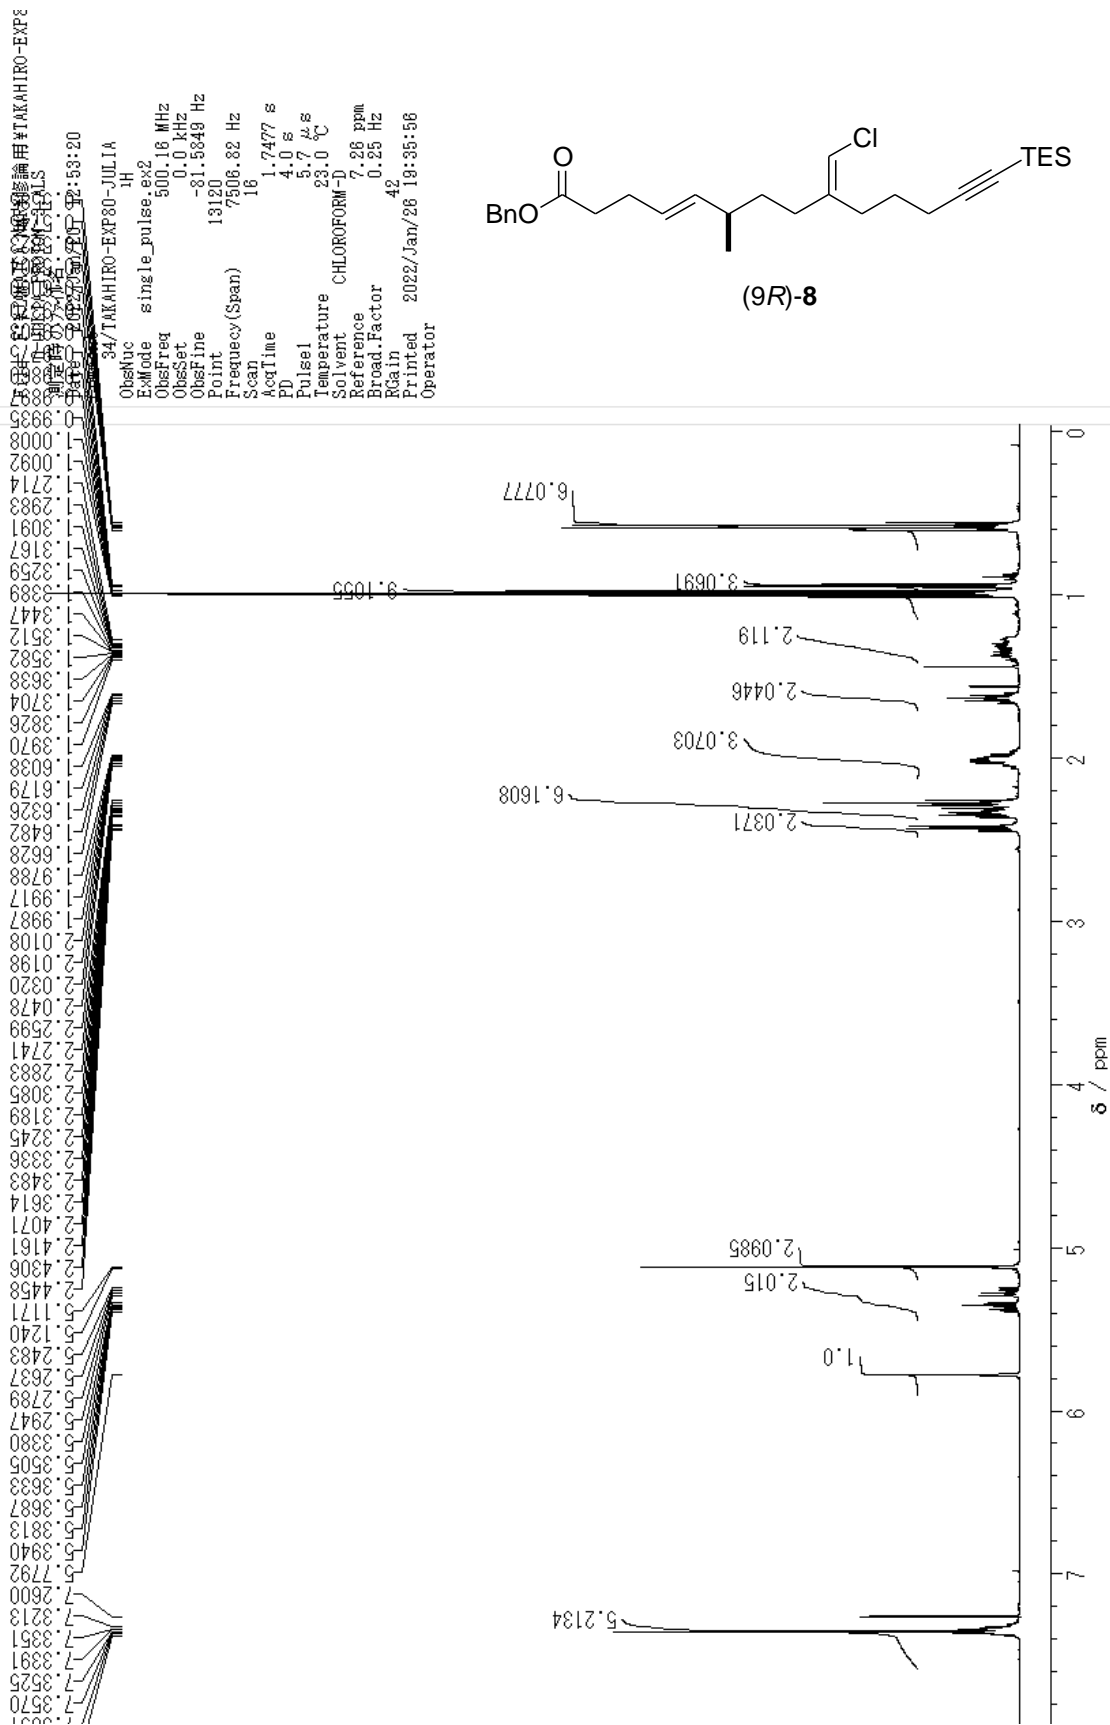

File F:\JAMALICA NMR\修論用\TAKAHIRO-EXP8  
 0-JULIA CARBON-3. ALS  
 測定時刻 0774分  
 Date 2022/Jan/20 13:44:31  
 Comment 34/TAKAHIRO-EXP80-JULIA  
 ObsNuc 13C  
 ExMode single\_pulse\_dec  
 ObsFreq 125.77 MHz  
 ObsSet -5.0 kHz  
 ObsFine 313.4247 Hz  
 Point 26224  
 Frequency(Span) 31444.86 Hz  
 Scan 1024  
 AcqTime 0.834 s  
 PD 2.0 s  
 Pulse 4.1917  $\mu$ s  
 Temperature 23.7  $^{\circ}$ C  
 Solvent CHLOROFORM-D  
 Reference 77.16 ppm  
 Broad.Factor 0.25 Hz  
 RGain 50  
 Printed 2022/Jan/28 14:27:39  
 Operator

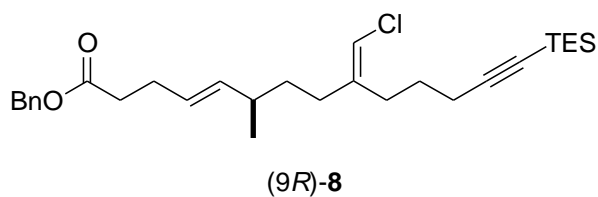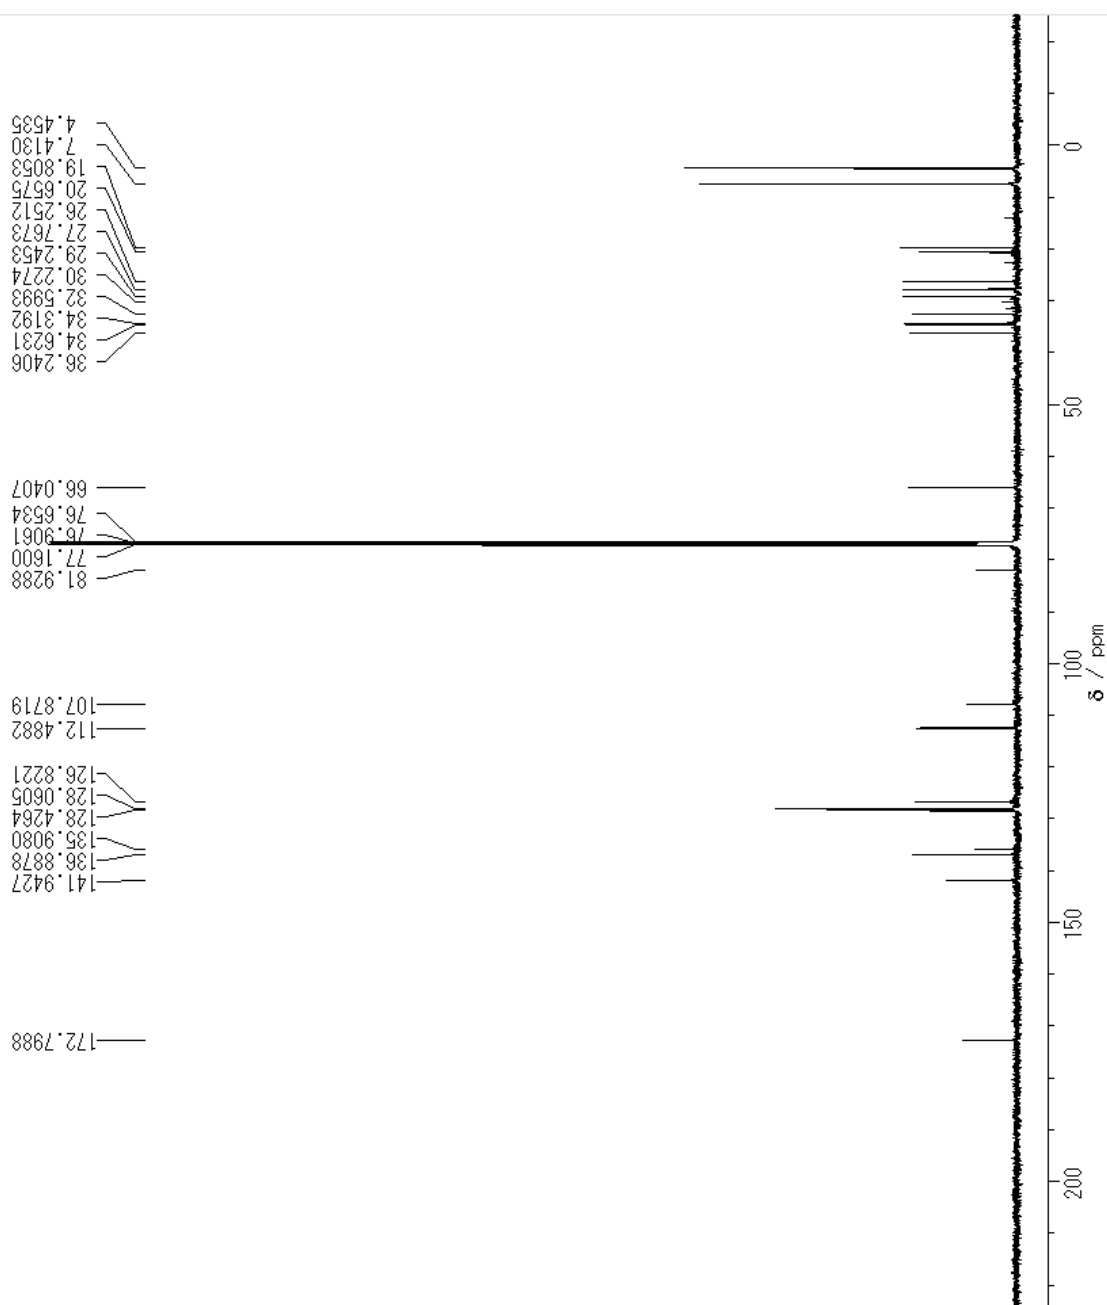

File F:\JAMAICA NMR討論用\TAKAHIRO-EXP6  
 6-KOH-PROTON-3.MLS  
 測定時の75/体名  
 Date 2021/Dec/10 18:00:44  
 Comment 34/takahiro-exp66-KOH  
 ObsNuc 1H  
 ExMode single\_pulse.ex2  
 ObsFreq 500.16 MHz  
 ObsSet 0.0 kHz  
 ObsFine -81.5849 Hz  
 Point 13120  
 Frequency(Span) 7506.82 Hz  
 Scan 16  
 AcqTime 1.7477 s  
 PD 4.0 s  
 Pulse 5.7 μs  
 Temperature 21.0 °C  
 Solvent CHLOROFORM  
 Reference 7.26 ppm  
 Broad.Factor 0.2861 Hz  
 RGain 38  
 Printed 2022/Jan/26 19:42:20  
 Operator

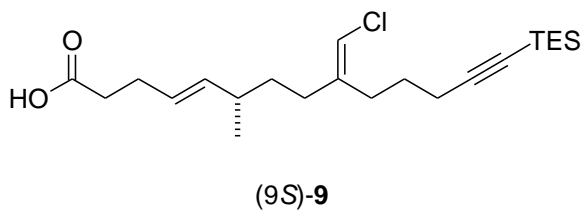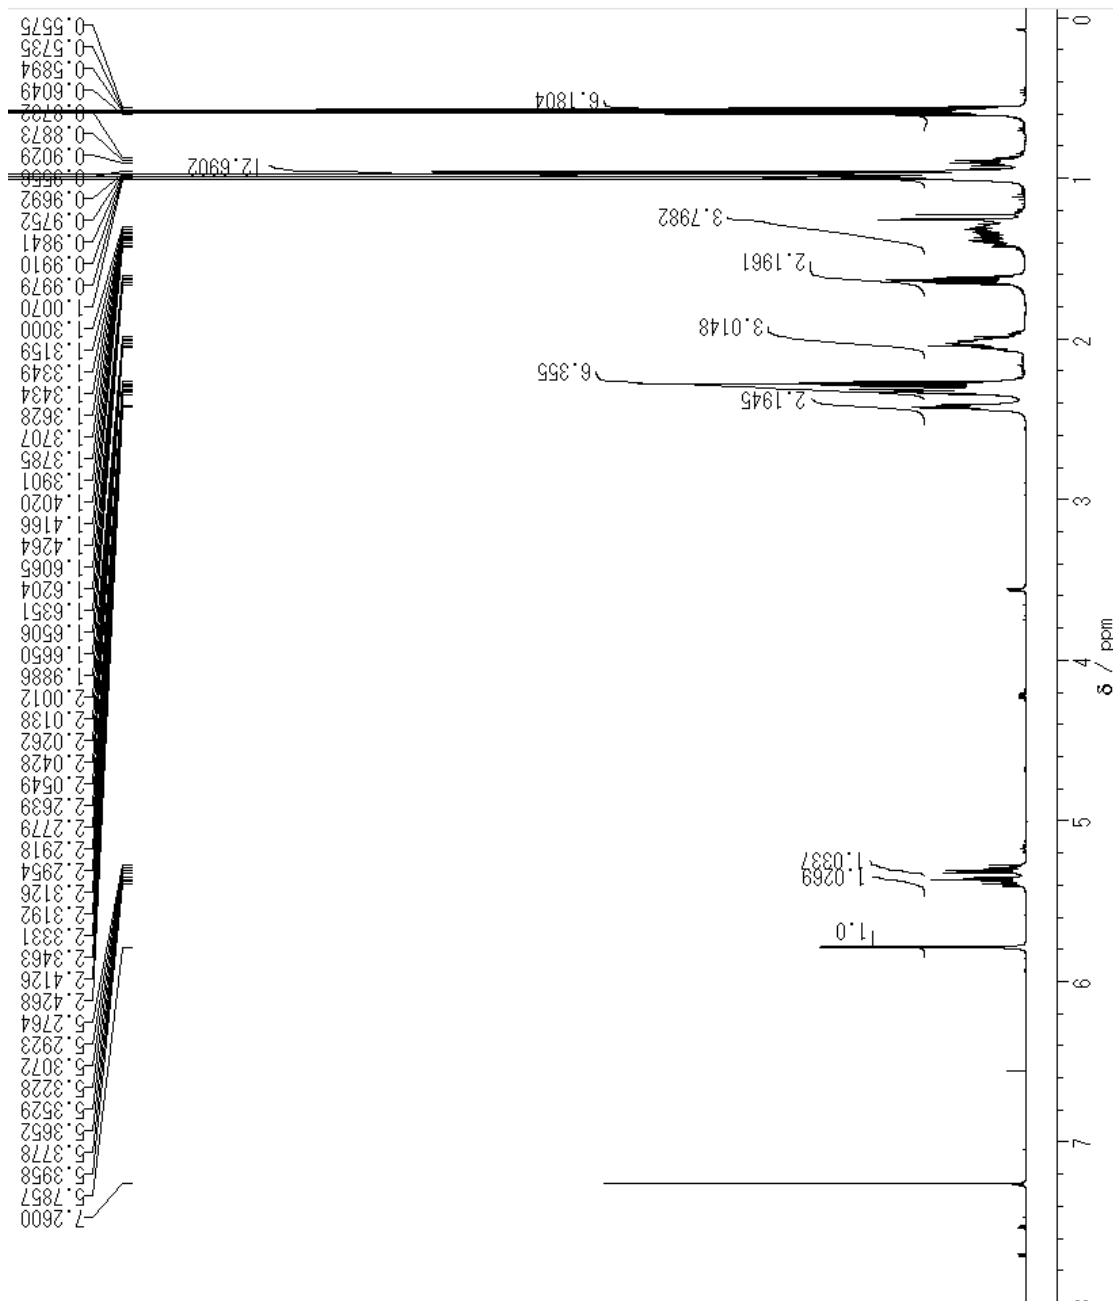

34-takahiro-exp81-KOH  
 ObsNuc 1H  
 ExpMode single\_pulse.ex2  
 ObsFreq 500.16 MHz  
 ObsP1 0.0 kHz  
 ObsP2 -81.5849 Hz  
 Point 13120  
 Frequency(Span) 7506.82 Hz  
 Scan 16  
 AcqTime 1.7477 s  
 PD 4.0 s  
 Pulse 5.7 μs  
 Temperature 22.1 °C  
 Solvent CHLOROFORM-D  
 Reference 7.26 ppm  
 Broad.Factor 0.25 Hz  
 RGain 40  
 Printed 2022/Jan/26 18:48:32  
 Operator

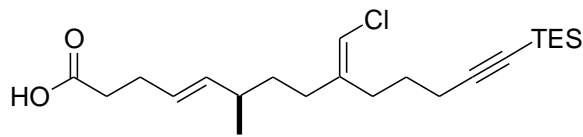

(9R)-9

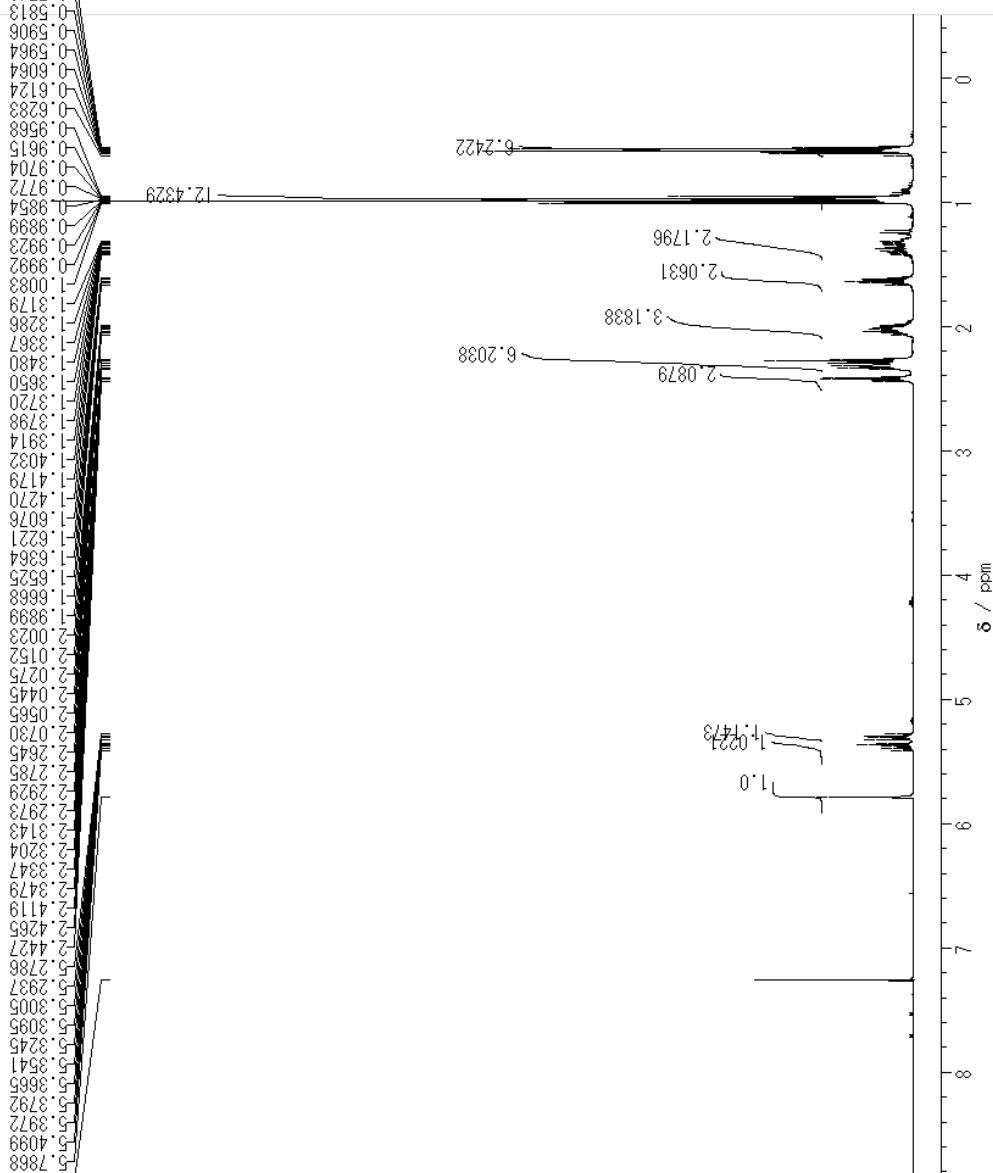

File F:\JAMATA NMR\修論用\34-TAKAHIRO-E  
 XP81-KOH-CARBON-3 ALS  
 測定時の7分体  
 Date 2022/Jan/21 17:21:17  
 Comment 34-takahiro-exp81-KOH  
 ObsNuc <sup>13</sup>C  
 ExMode single\_pulse\_dec  
 ObsFreq 125.77 MHz  
 ObsSet -5.0 kHz  
 ObsFine 313.4247 Hz  
 Point 28224  
 Frequency(Span) 31444.88 Hz  
 Scan 1024  
 AcqTime 0.834 s  
 PD 2.0 s  
 Pulse 4.1917 μs  
 Temperature 22.6 °C  
 Solvent CHLOROFORM-D  
 Reference 77.16 ppm  
 Refd.Factor 0.25 Hz  
 RGain 50  
 Printed 2022/Jan/28 14:38:33  
 Operator

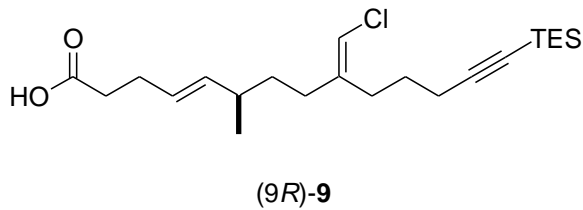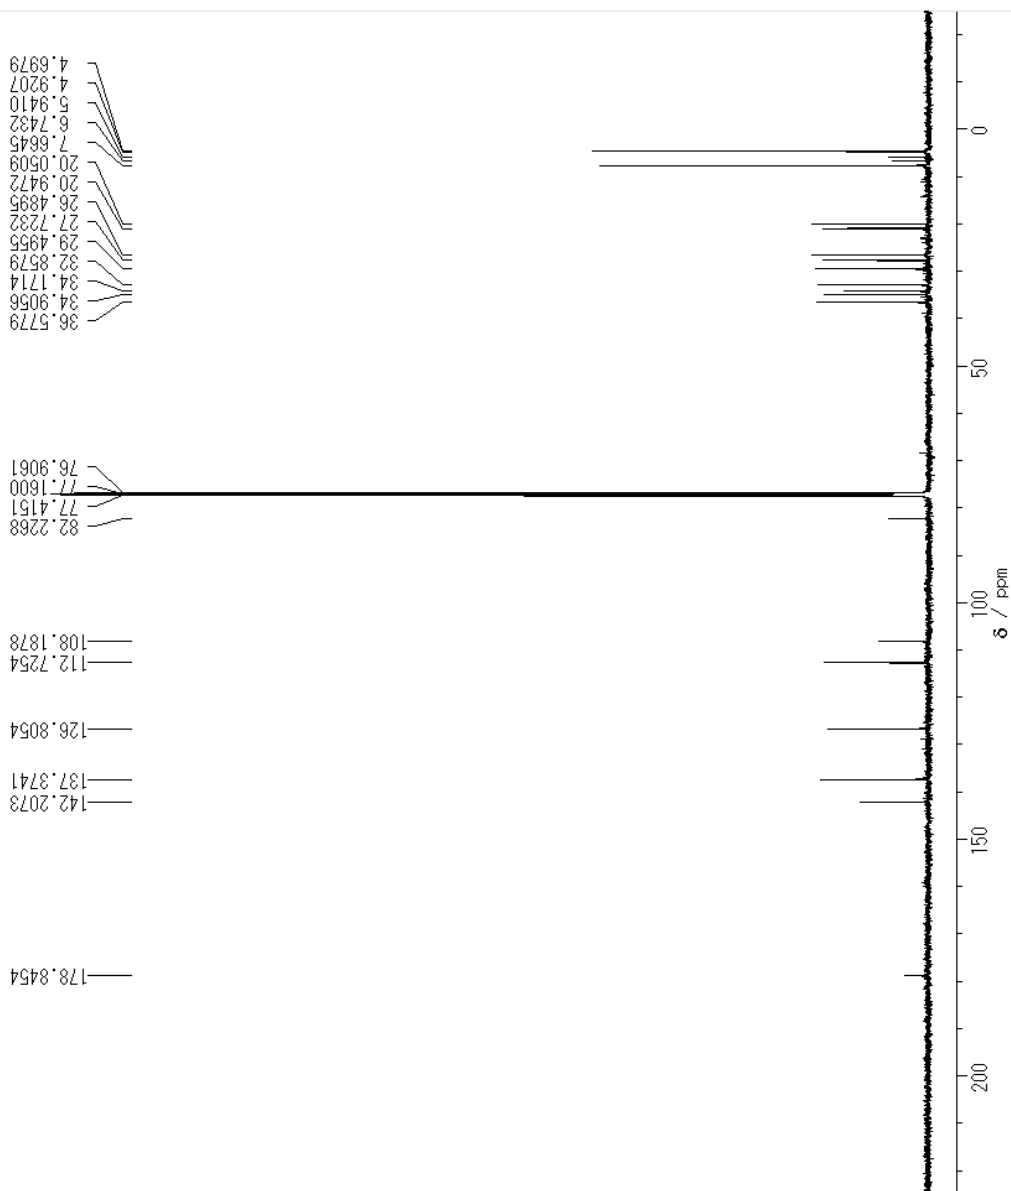

77777777 D:\HISAKAWA\JAMATC\IDES\RYOSUKE  
 j091\_PROTON-3\_1M  
 C:\XDoc\assats and Settings\alice  
 2023年10月23日 16:29:09  
 34/ryosuke\jamatc\ides\ryosuke\_j091\_1  
 PROTON-3\_als  
 測定日時 10/23/2023 16:29:09  
 注釈

34/ryosuke\_j091  
 観測核種 <sup>1</sup>H  
 測定モード single\_pulse.ex2  
 F1 (0 ppm) 500.152416909 MHz  
 F2 (0 ppm) 500.152409813 MHz  
 観測周波数(組) 500.16 MHz  
 観測周波数offset 2.41 kHz  
 観測周波数fine 6.0092 Hz  
 フェーズ角 13120  
 観測範囲 7507.393 Hz  
 実観測回数 200  
 FID取込時間 1.7459 s  
 待ち時間 4.0 s  
 入射幅 5.7 Hz  
 decouple核種 <sup>13</sup>C  
 装置 ALICE  
 入射波 577 MHz  
 試料温度 38度  
 測定溶媒 CDCl<sub>3</sub>  
 測定溶媒 25.4 °C  
 Chemical shift参照値 7.26 ppm  
 Broadening係数 0.2861 Hz  
 窓関数 Exponential  
 Receiver Gain 54

測定者  
 印刷日時 2023/Dec/19 10:12:15

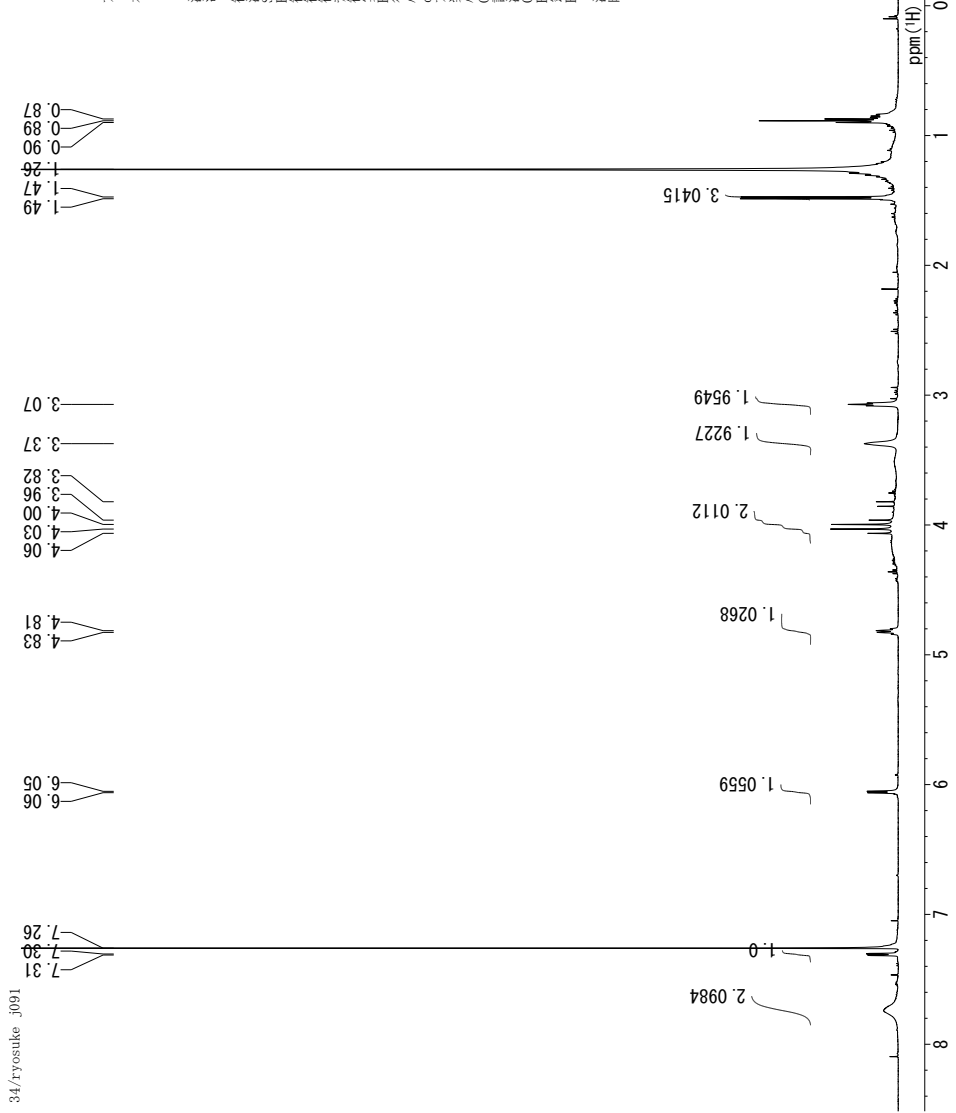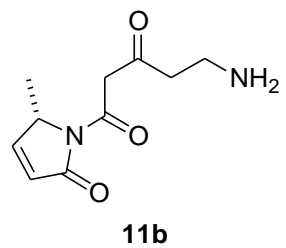

7144名 D:\USBNMR\NMR\_以隣前~2022\J007\_13  
 C DIKETONE ROC DEPROTECTION\_RMI  
 初期714名 D:\USBNMR\NMR\_以隣前~2022\RYO  
 SUKE\_J007\_FR11\_13C\_CARBON-9\_IDF  
 測定日時 12/May/2022 18:17:52  
 注釈  
 34/ryosuke\_J007\_fr11\_13C  
 観測核種 single\_pulse\_dc  
 SFO (ppm) 195.765311267 MHz  
 Freq. (0 ppm) 125.752735994 MHz  
 観測周波数(組) 125.77 MHz  
 観測周波数offset -5.0 kHz  
 観測周波数fine 314.6243 Hz  
 テーポイント数 26224  
 観測範囲 31456.86 Hz  
 取得時間 14  
 待機時間 0.8336 s  
 待ち時間 2.6767 s  
 観測核種 H  
 decouple核種 H  
 7144名  
 装置 ECA 500  
 観測核種  $^{13}\text{C}$   
 Gradient プログラム  
 試料温度 23.0 °C  
 測定溶媒 CHLOROFORM-D  
 Chemical shift 参照値 100.0 ppm  
 Decoupling モード 2.5 Hz  
 観測数 Exponential  
 Receiver gain 64  
 測定者  
 印刷日時 2023/Dec/19 10:16:20

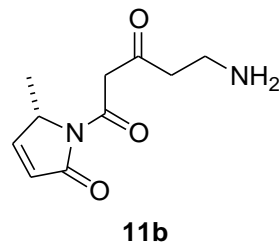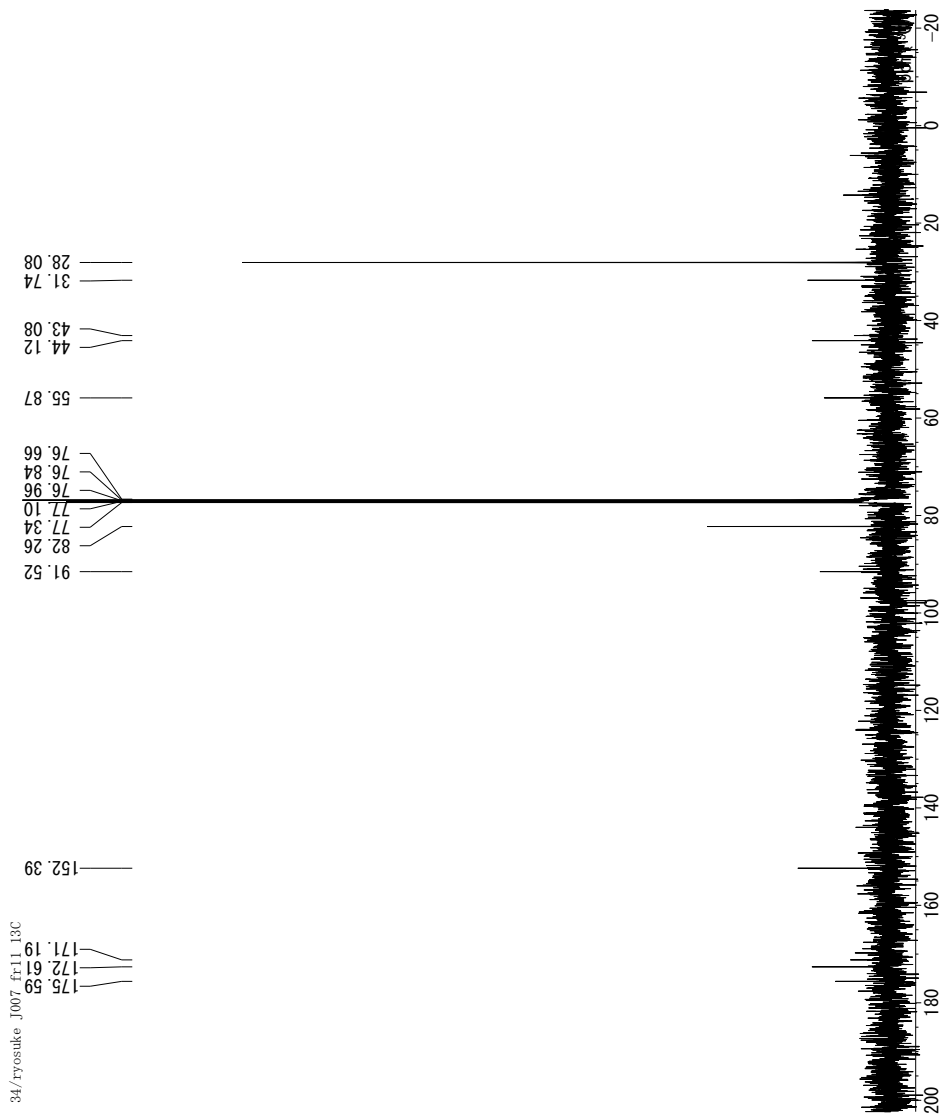

34/ryosuke\_j-peptide 2

7716名 C:\USERS\浅田亮介\DESKTOP\FMFRMR\_JA  
 M1CAMIDESRYOSUKE\_J-PEPTIDE\_2\_PROTON-3  
 MI  
 初期ファイル名 C:\Documents and Settings\alice2  
 浅田亮介\デスクトップ\2023年度のアーカイブ\研究  
 至\ryosuke\jama\camidesryosuke\_j-peptide  
 c\PROTON-3\_6  
 測定日時 10/Nov/2023 15:16:28  
 注釈

34/ryosuke\_j-peptide 2  
 観測核種 <sup>1</sup>H  
 測定モード single\_pulse.ex2  
 SF01 500.162416009 MHz  
 Freq. (0 ppm) 500.15999813 MHz  
 観測周波数(組) 500.16 MHz  
 観測周波数offset 2.41 kHz  
 観測周波数fine 6.0092 Hz  
 テーパ点数 13120  
 観測範囲 7507.383 Hz  
 実掃戻回数 16  
 FID貯込時間 1.7459 s  
 待ち時間 4.0 s  
 1/2幅 3.7 μs  
 decouple核種 <sup>13</sup>C  
 プログラム ALICE  
 核種 <sup>13</sup>C  
 1/2幅 17.7 μs  
 観測核種 <sup>13</sup>C  
 観測周波数 386 MHz  
 Gradient 7.774  
 試料温度 25.0 °C  
 測定溶媒 CDCl<sub>3</sub>  
 Chemical shift参照値 7.26 ppm  
 Broadening係数 0.2861 Hz  
 歪曲数 Exponential  
 Receiver Gain 42

測定者  
 印刷日時 2023/Dec/19 00:10:42

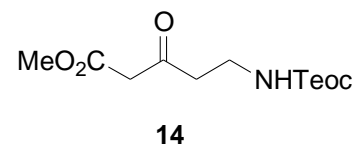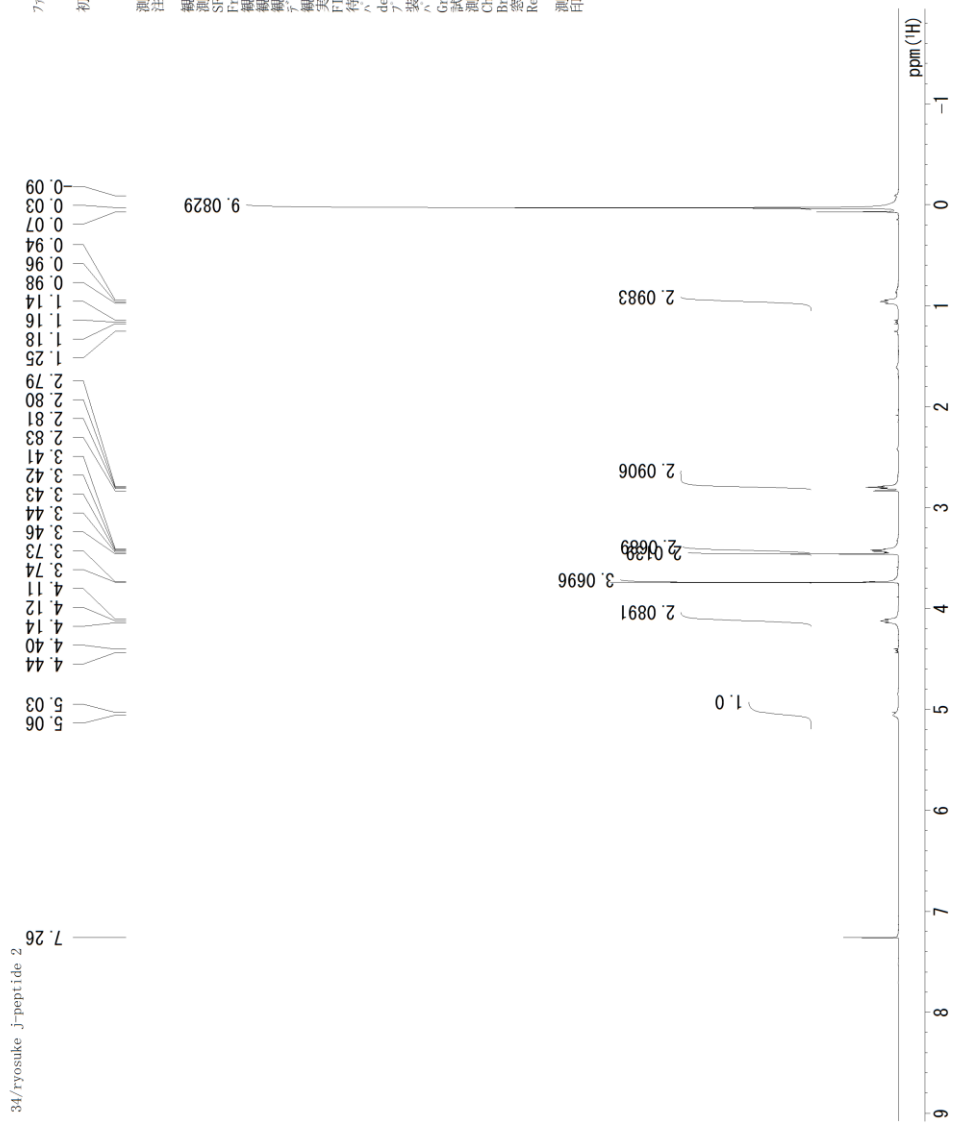





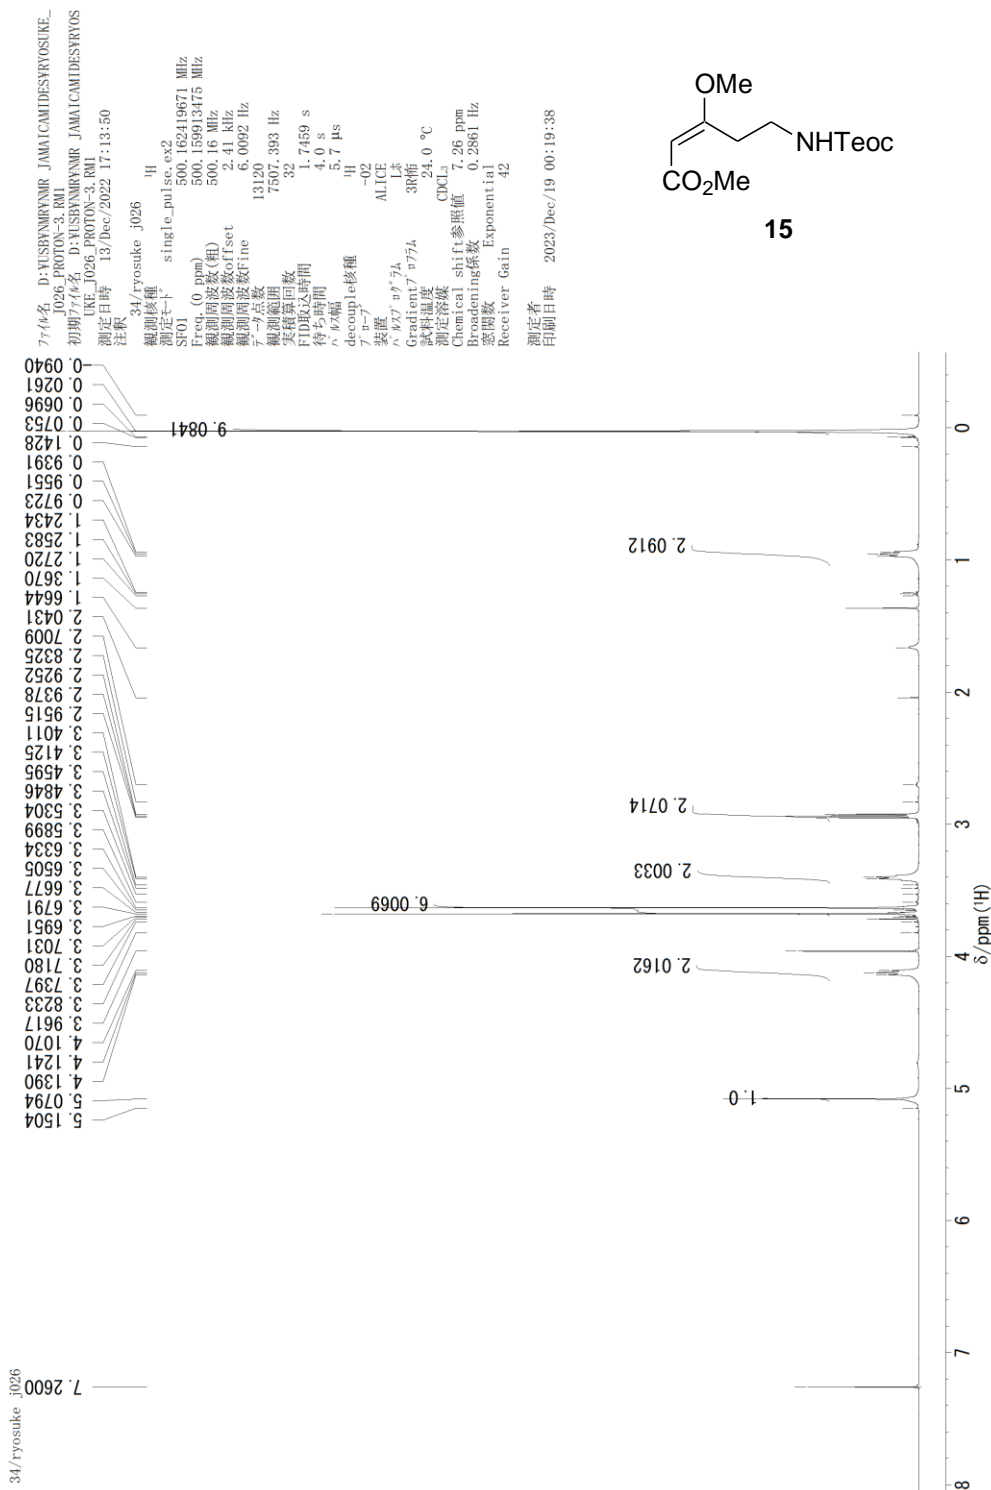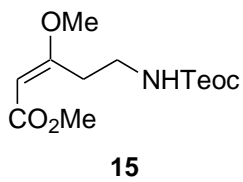

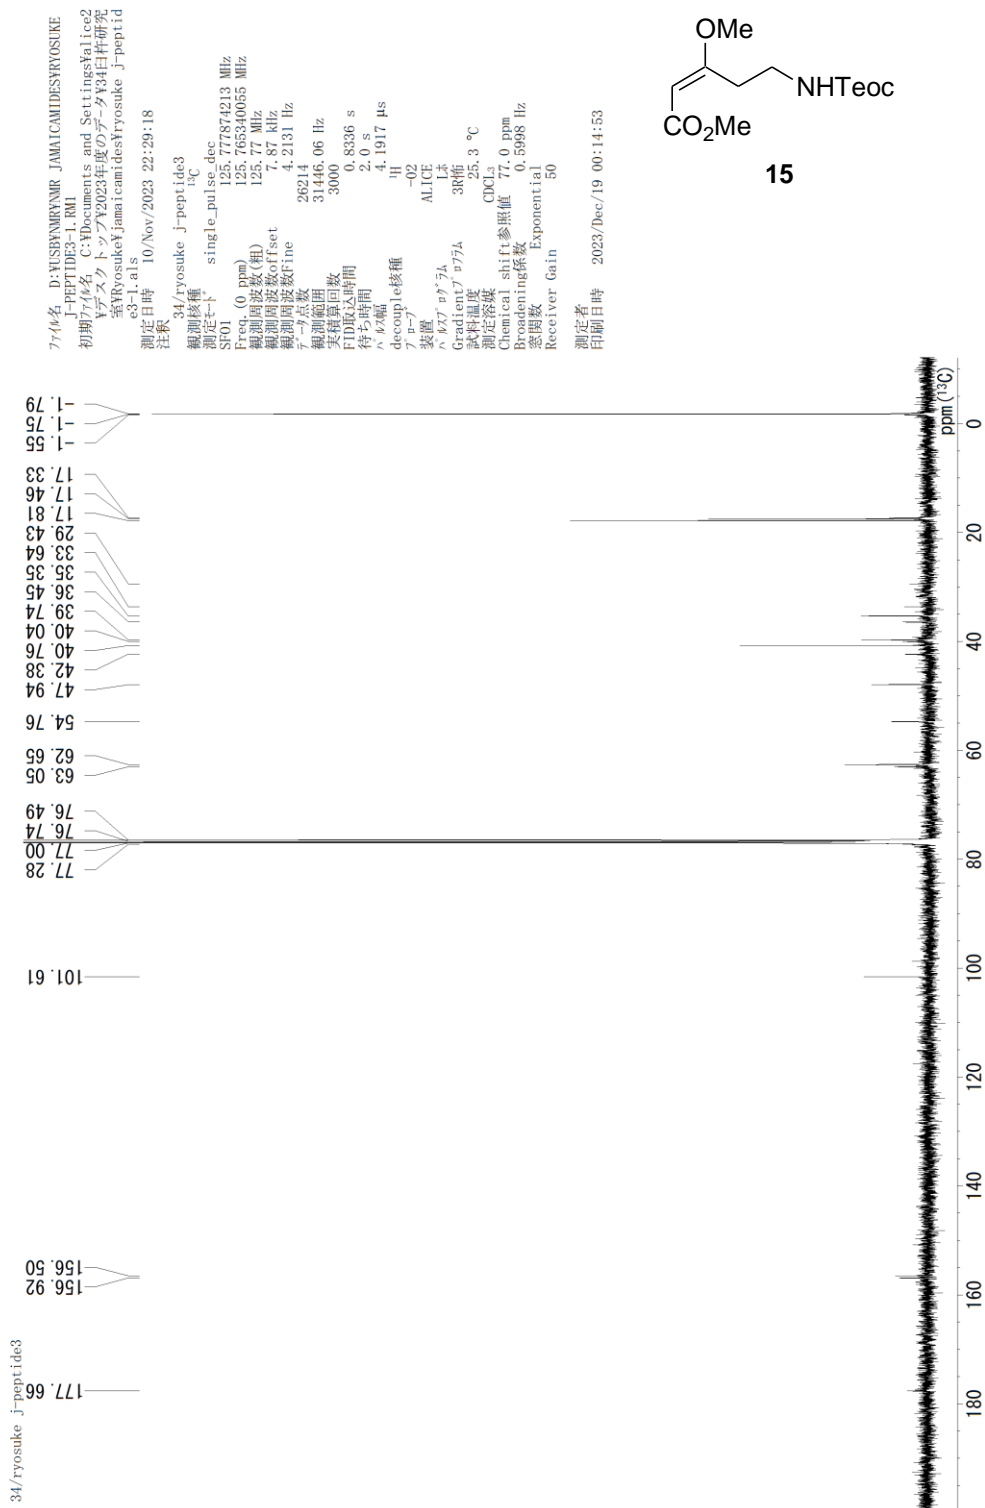



34/ryosuke\_j-peptide1.ded  
 34/ryosuke\_j-peptide1.ded  
 7444名 D:\SUB\NMR\JAMAICAMIDES\RYOSUKE  
 J-PEPTIDE4-1.RM1  
 初期ファイル名 C:\Documents and Settings\valice2  
 ヴァルレストップ\2023年度のデータ\34日付研究  
 室\RYOSUKE\jamaicamides\ryosuke\_j-peptide  
 e4-1.a1s  
 測定日時 10/Dec/2023 00:56:59  
 注釈 34/ryosuke\_j-peptide1  
 編測核種 <sup>13</sup>C  
 測定モード single\_pulse\_dec  
 SFO1 125.777874213 MHz  
 Freq. (0 ppm) 125.765310068 MHz  
 編測周波数(相) 125.77 MHz  
 編測周波数offset 7.87 kHz  
 編測周波数Fine 4.2131 Hz  
 テーパ点数 26214  
 編測範囲 31446.06 Hz  
 実積算回数 3000  
 FID取込時間 0.8336 s  
 待ち時間 2.0 s  
 へルム 4.1917 μs  
 decouple核種 H  
 振数 402  
 ALICE  
 647.975A  
 Gradient 38階  
 試料温度 25.3 °C  
 測定溶媒 CDCl<sub>3</sub>  
 Chemical shift 参照値 77.0 ppm  
 Broadening係数 0.5998 Hz  
 窓関数 Exponential  
 Receiver Gain 54  
 測定者 印刷日時 2023/Dec/19 00:21:58

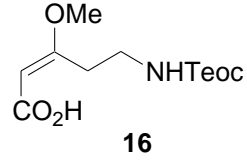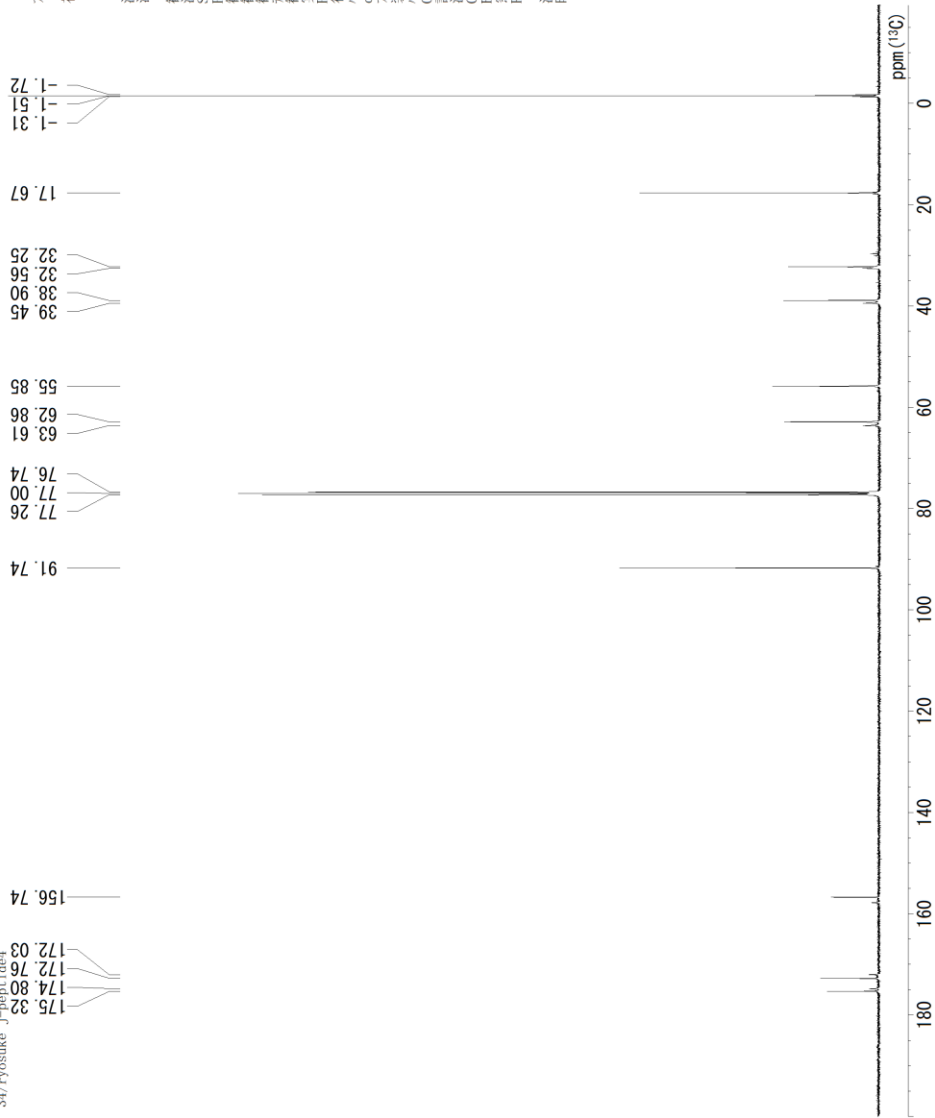

ファイル名 D:\USB\NMR\MR\_jamaicamides\RYOSUKE\_069\_PROTON-3.rml  
 初期ファイル名 C:\Documents and Settings\alice2\デスクトップ\2023年度のデータ\34日付研究室\RYOSUKE\jamaicamides\ryosuke\_069\_PROTON-3.rml  
 測定日時 06/Sep/2023 12:36:44  
 注家 34/ryosuke\_069

観測核種 1H  
 測定モード single\_pulse.et2  
 P1 (s) 500.162416009 MHz  
 P2 (s) 500.156909813 MHz  
 観測周波数(観) 500.16 MHz  
 観測周波数Offset 2.41 kHz  
 観測周波数Offset 6.0082 Hz  
 フェーズ数 13120  
 観測周波数 7507.393 Hz  
 実観測回数 16  
 FID取り時間 1.7459 s  
 待ち時間 4.0 s  
 核種 1H  
 decouple核種 13C  
 プログラム ALICE  
 装置 ALICE  
 実験者 38  
 Gradient プログラム 38  
 Gradient プログラム 38  
 試料温度 24.4 °C  
 測定溶媒 CDCl3  
 Chemical shift 参照値 7.26 ppm  
 Broadening 係数 0.2861 Hz  
 関数 Exponential  
 Receiver Gain 44

測定者 2023/Dec/19 00:34:36  
 印刷日時

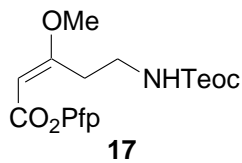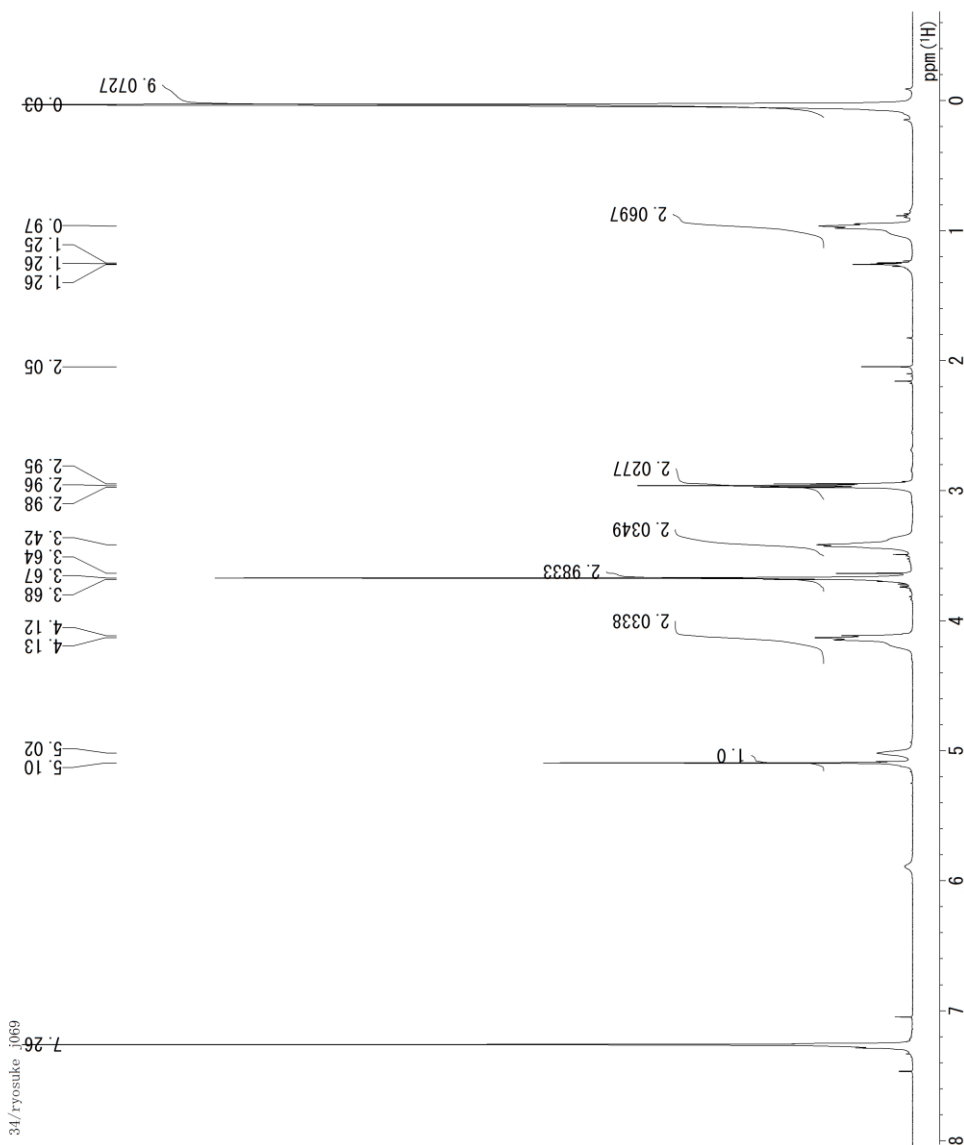

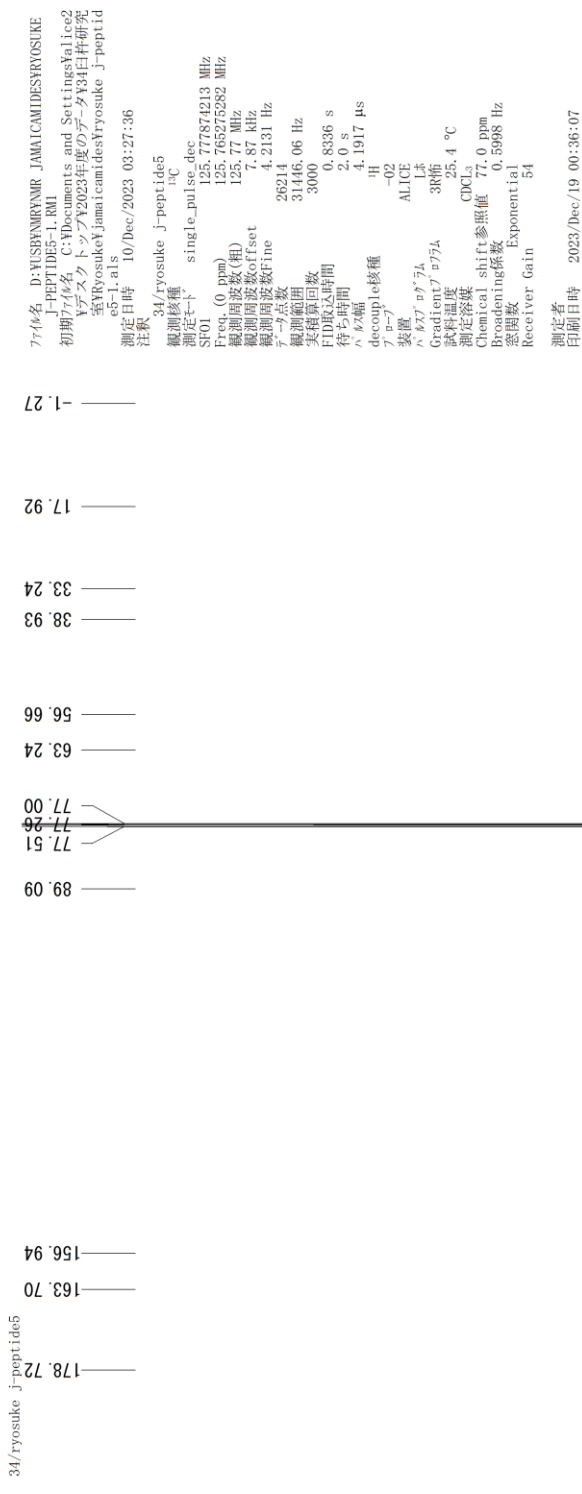

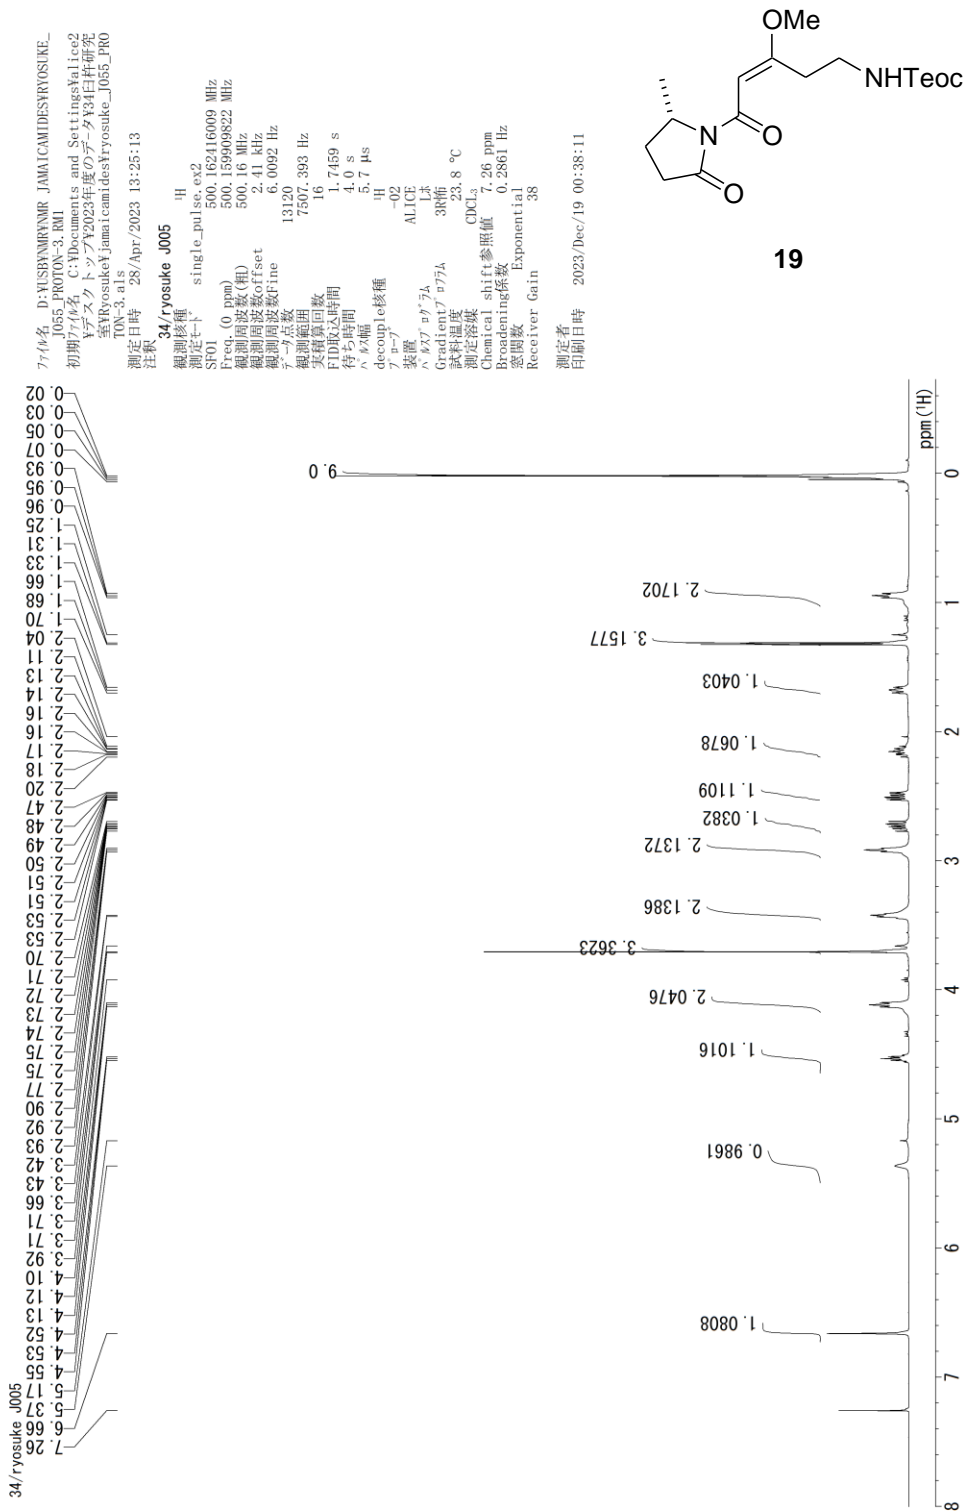



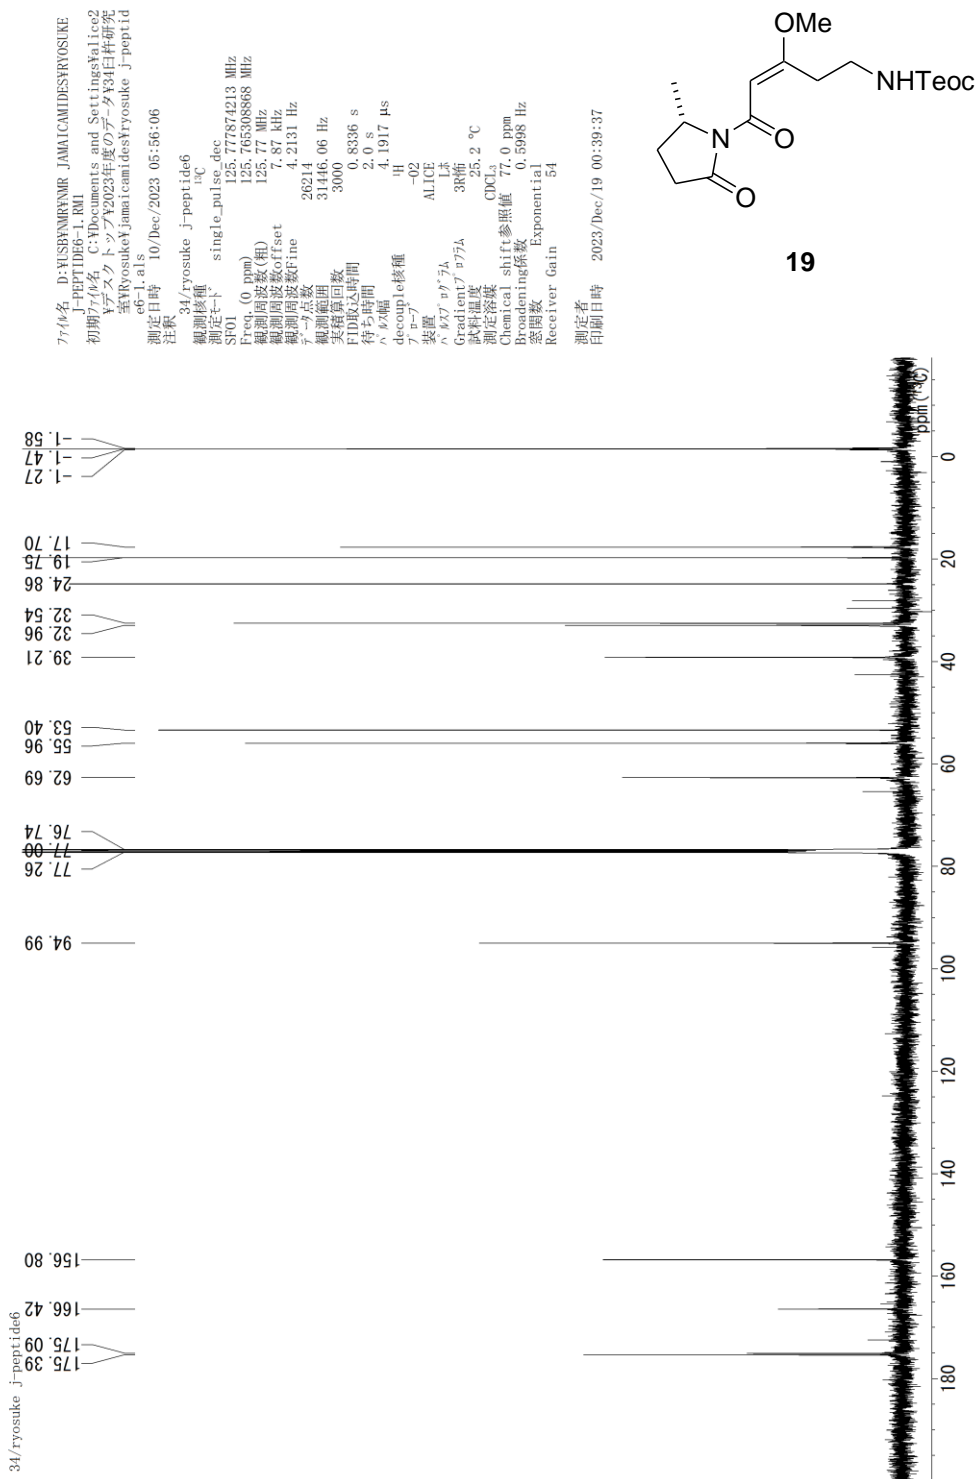

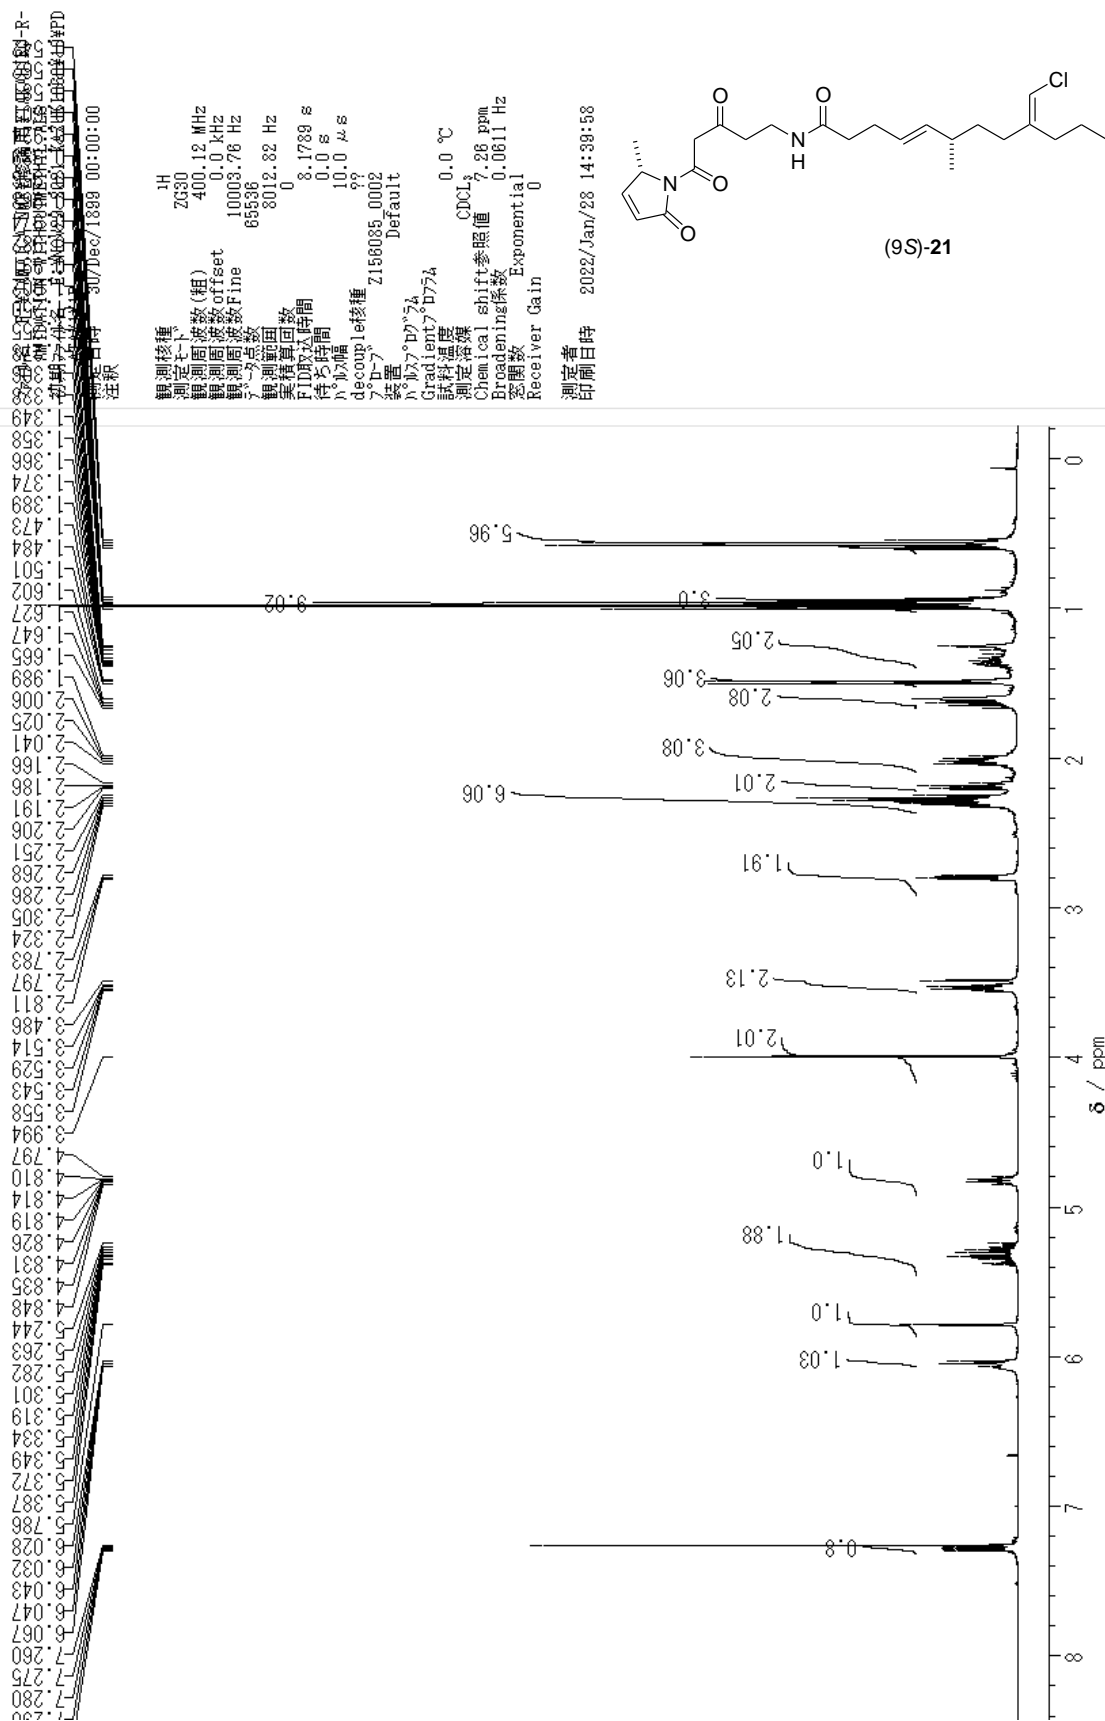



ファイル名: D:\USBNMR\NMR\_JAMA1CAMIDES\J082\_D1K  
 ETON-13C.NM1  
 初期ファイル名: E:\NMR\NMR\_JAMA1CAMIDES\J082-D1K  
 23-J082\_13C\TOPDATA\Y111  
 測定日時: 07/Aug/2023 13:57:39  
 注釈:

観測核種 <sup>13</sup>C  
 測定モード ZFGC30  
 SFO1 100.62929804 MHz  
 100.612768526 MHz  
 100.61 MHz  
 観測周波数(相) 0.0 Hz  
 観測周波数Offset 9998.688 Hz  
 観測周波数Pine 24038.46 Hz  
 観測周波数 1800  
 観測温度 1.3631 S  
 検出器 2.0 S  
 FID積分時間 12.0 μs  
 待ち時間  
 観測モード decouple核種 OFF  
 プログラム Z156085\_0002 (PA BBO 400S1 BB-HK)  
 装置 SPECT ZFGC30  
 メーカー パナソニック  
 Gradientプログラム 29.9994 °C  
 試料温度 CDCl<sub>3</sub>  
 測定溶媒 Chemical shift参照値 219.4603 ppm  
 Broadening係数 0.25 Hz  
 窓関数 Exponential  
 Receiver Gain 197

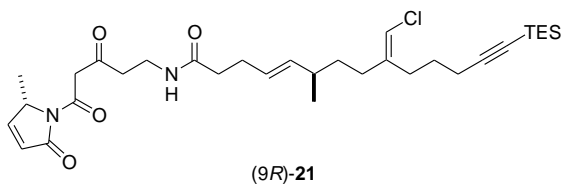

測定者 2023/Dec/19 00:41:50  
 印刷日時

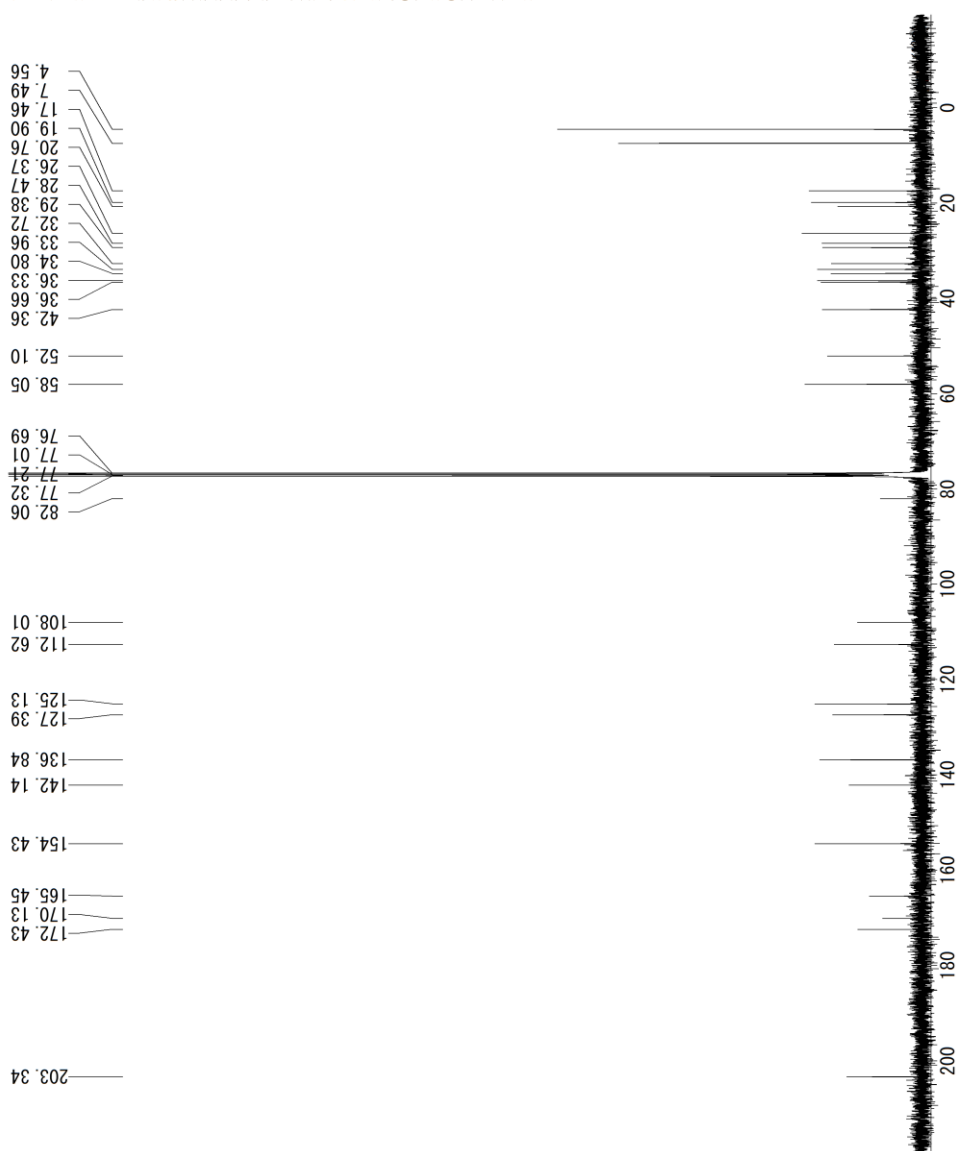

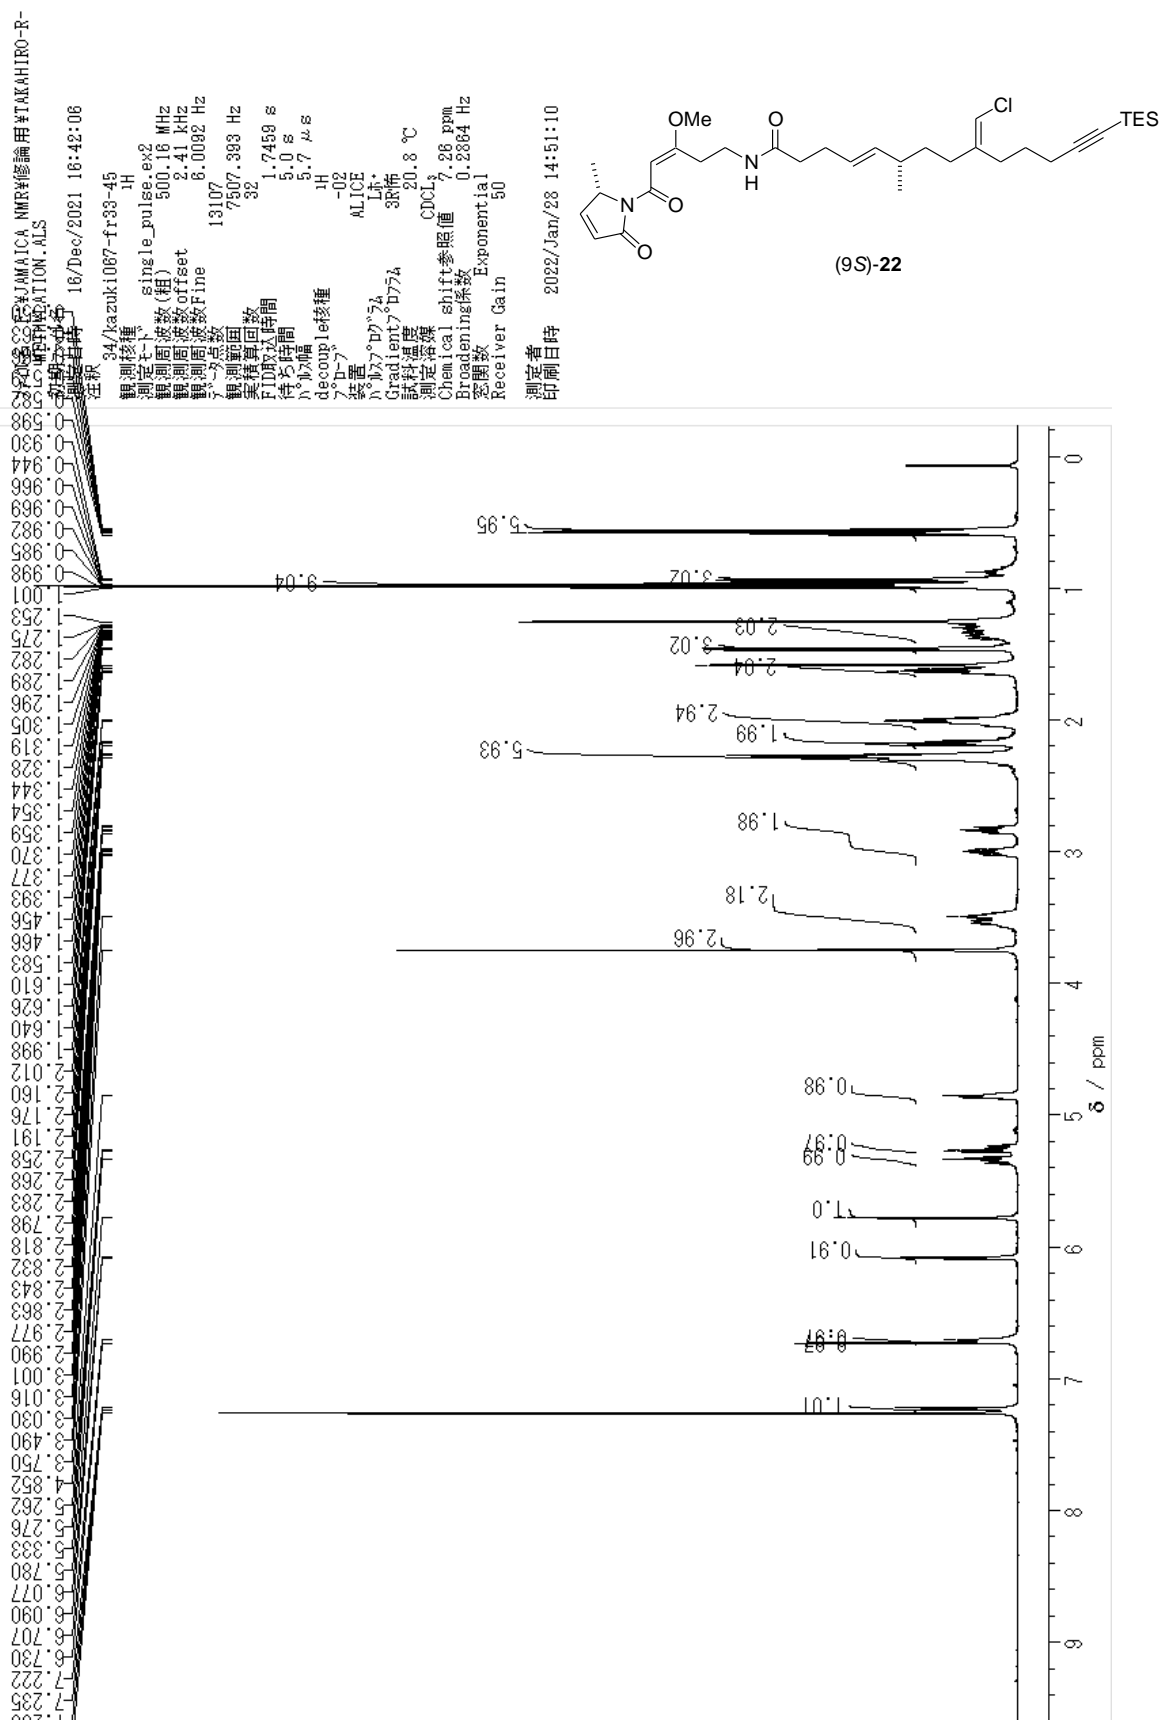



34/ryosuke\_J083 C

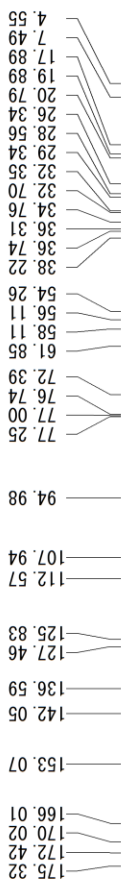

77.49  
J083\_C\_CARBON-3\_RMI  
初測ファイル名 C:\Documents and Settings\valice2  
Vデスクトップ\2023年度のデータ\34日付研究  
室\ryosuke\jamaicami\des\ryosuke\_J083\_C\_C  
ARBON-3.sls  
測定日時 22/Aug/2025 11:18:22  
注釈

34/ryosuke\_J083 C <sup>13</sup>C  
観測核種 <sup>13</sup>C  
測定モード single\_pulse\_dec  
SP01 125.777874213 MHz  
125.765309667 MHz  
Frecd (0 ppm)  
観測周波数(相) 125.77 MHz  
観測周波数offset 7.87 kHz  
観測周波数fine 4.2131 Hz  
観測周波数 26224.06 Hz  
31466.06 Hz  
観測周波数 26  
1.8336 s  
FID取得時間 2.0 s  
待ち時間 4.1917 Ms  
decompile核種 H  
7 p=7  
-02  
装置 ALICE  
パルスプログラム 3RF  
Gradientプログラム 3RF  
試料温度 25.2 °C  
測定溶媒 CDCl<sub>3</sub>  
Chemical shift参照値 77.0 ppm  
Broadening係数 0.5996 Hz  
窓関数 Exponential  
Receiver Gain 54

測定者  
印刷日時 2023/Dec/19 00:44:11

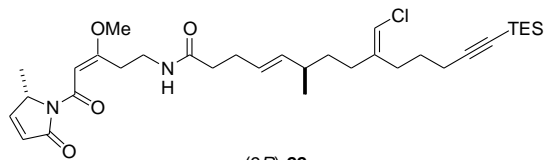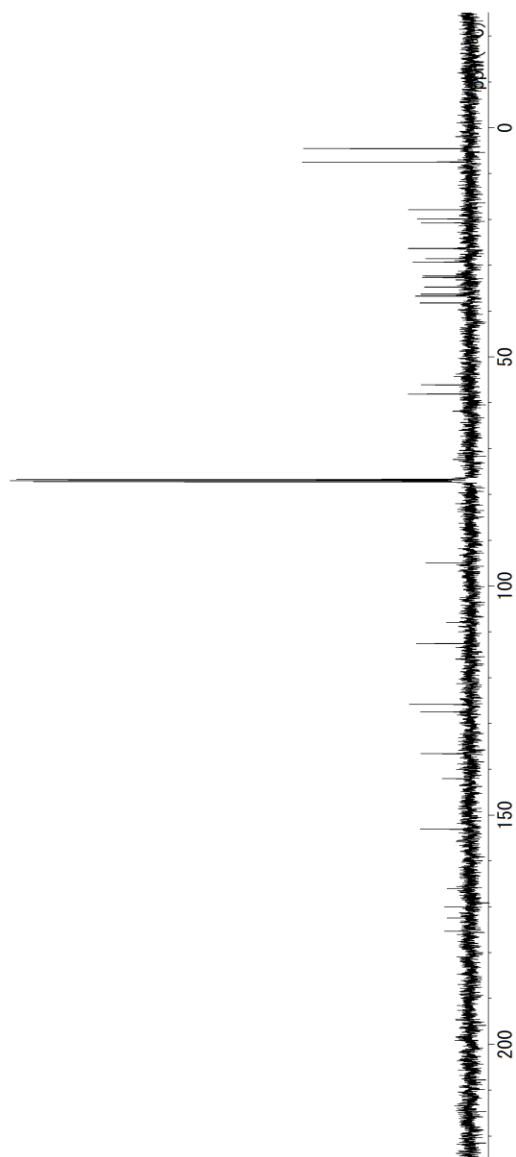

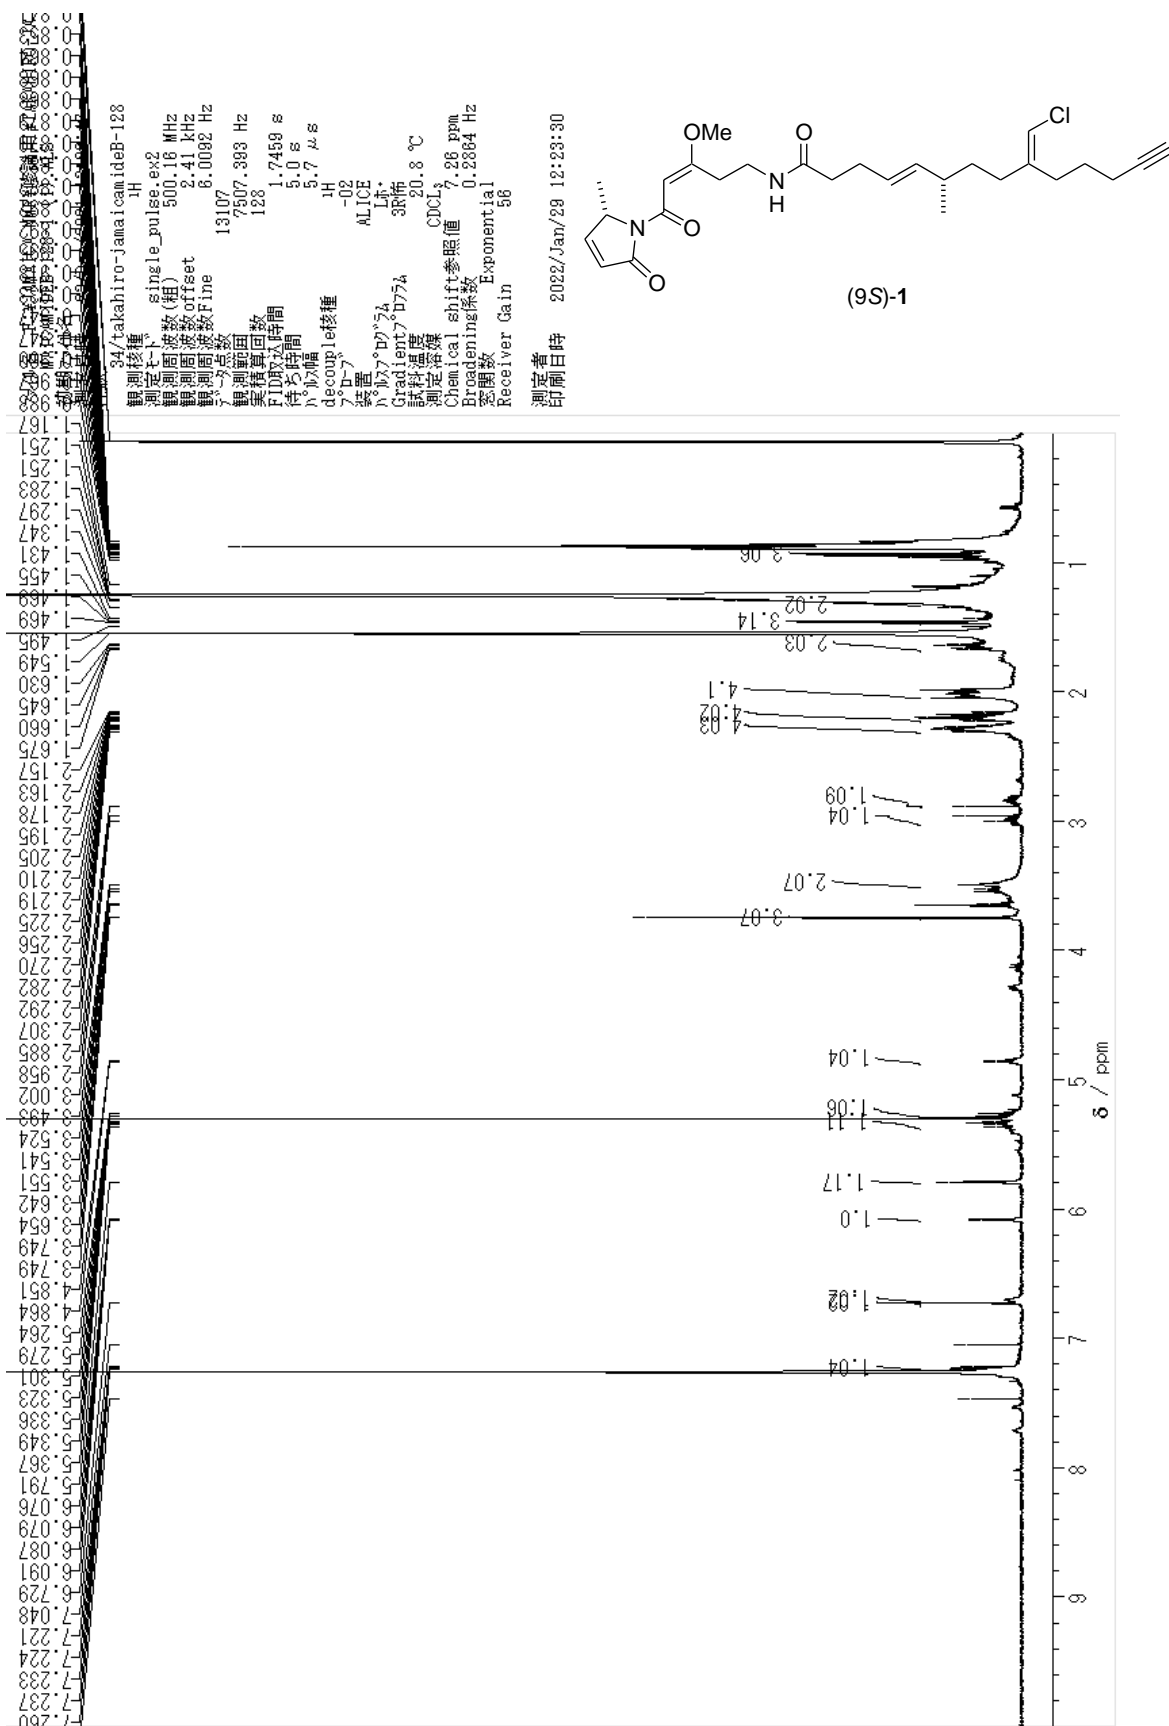



ファイル名 D:\NMR\NMR JAMAICAMIDESRYOSUKE\_1086\_JAMAICAMIDE.B.PROTON-3.1MI  
 初期ファイル名 C:\Documents and Settings\alice2  
 ヴィスケクトップ2023年度のデータY34白粉研究  
 至RYOSUKE\jamaicamidestryosuke\_1086\_jam  
 aicamide.B.PROTON-3.als  
 ai  
 測定日時 31/Aug/2023 16:52:47  
 注釈 34/ryosuke\_1086\_jamaicamide B

観測核種 H  
 測定パルス single\_pulse.ex2  
 SF01 500.162416009 MHz  
 Freq. (0 ppm) 500.159909813 MHz  
 観測周波数(相) 500.16 MHz  
 観測周波数offset 2.41 kHz  
 観測周波数fine 6.0092 Hz  
 テーパ点数 13120  
 観測範囲 7507.393 Hz  
 742  
 実積算回数 1.7459 s  
 FID取込時間 4.0 s  
 待ち時間 5.7 μs  
 ハルズ幅 H  
 decouple核種 -02  
 プローブ ALICE  
 装置 ALICE  
 ハルスプログラマ LR  
 Gradientプログラマ 3R希  
 試料温度 26.6 °C  
 測定溶媒 CDCl<sub>3</sub>  
 Chemical shift参照値 7.26 ppm  
 Broadening係数 0.2861 Hz  
 歪周波 Exponential  
 Receiver Gain 50  
 測定者 2023/Dec/19 00:48:37  
 印刷日時

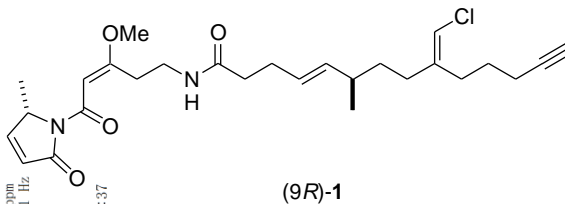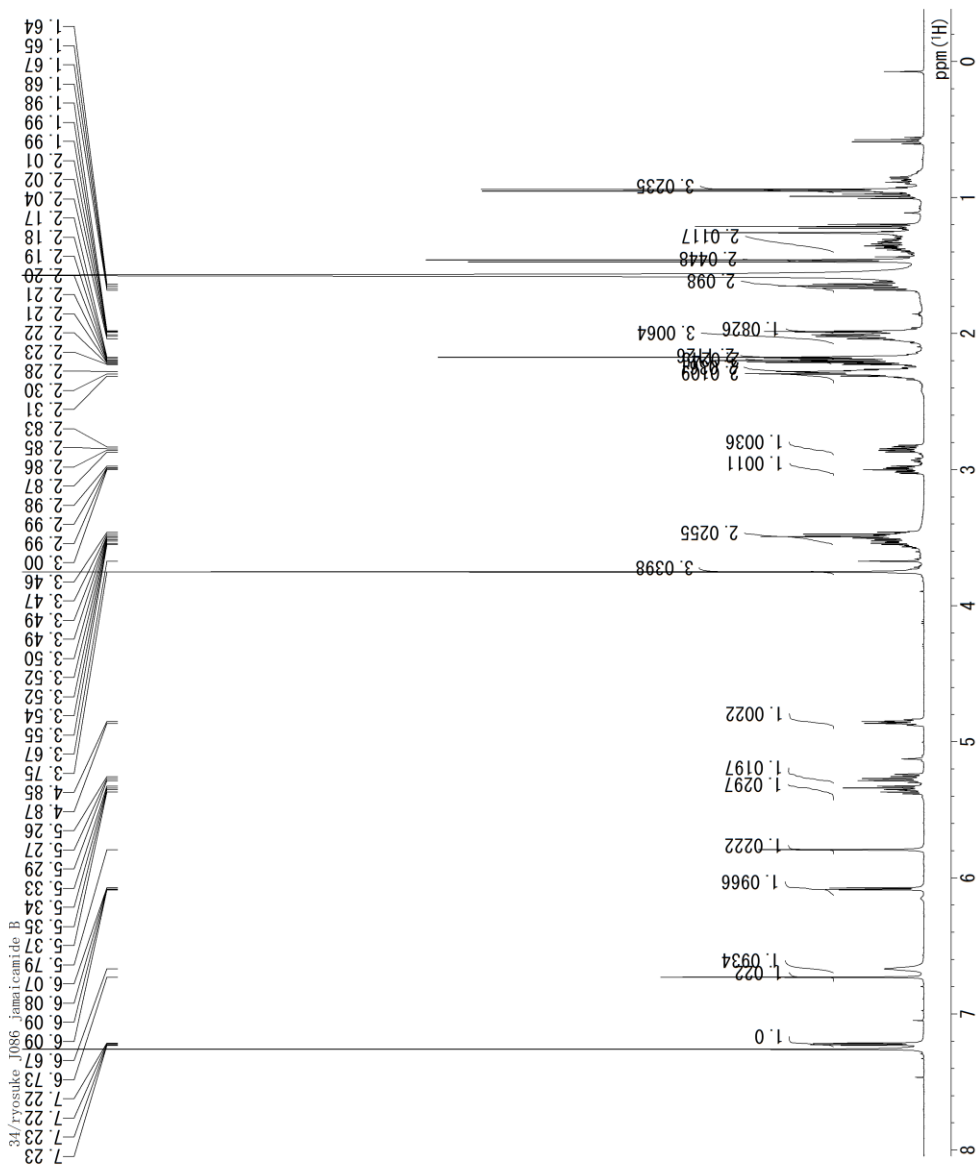

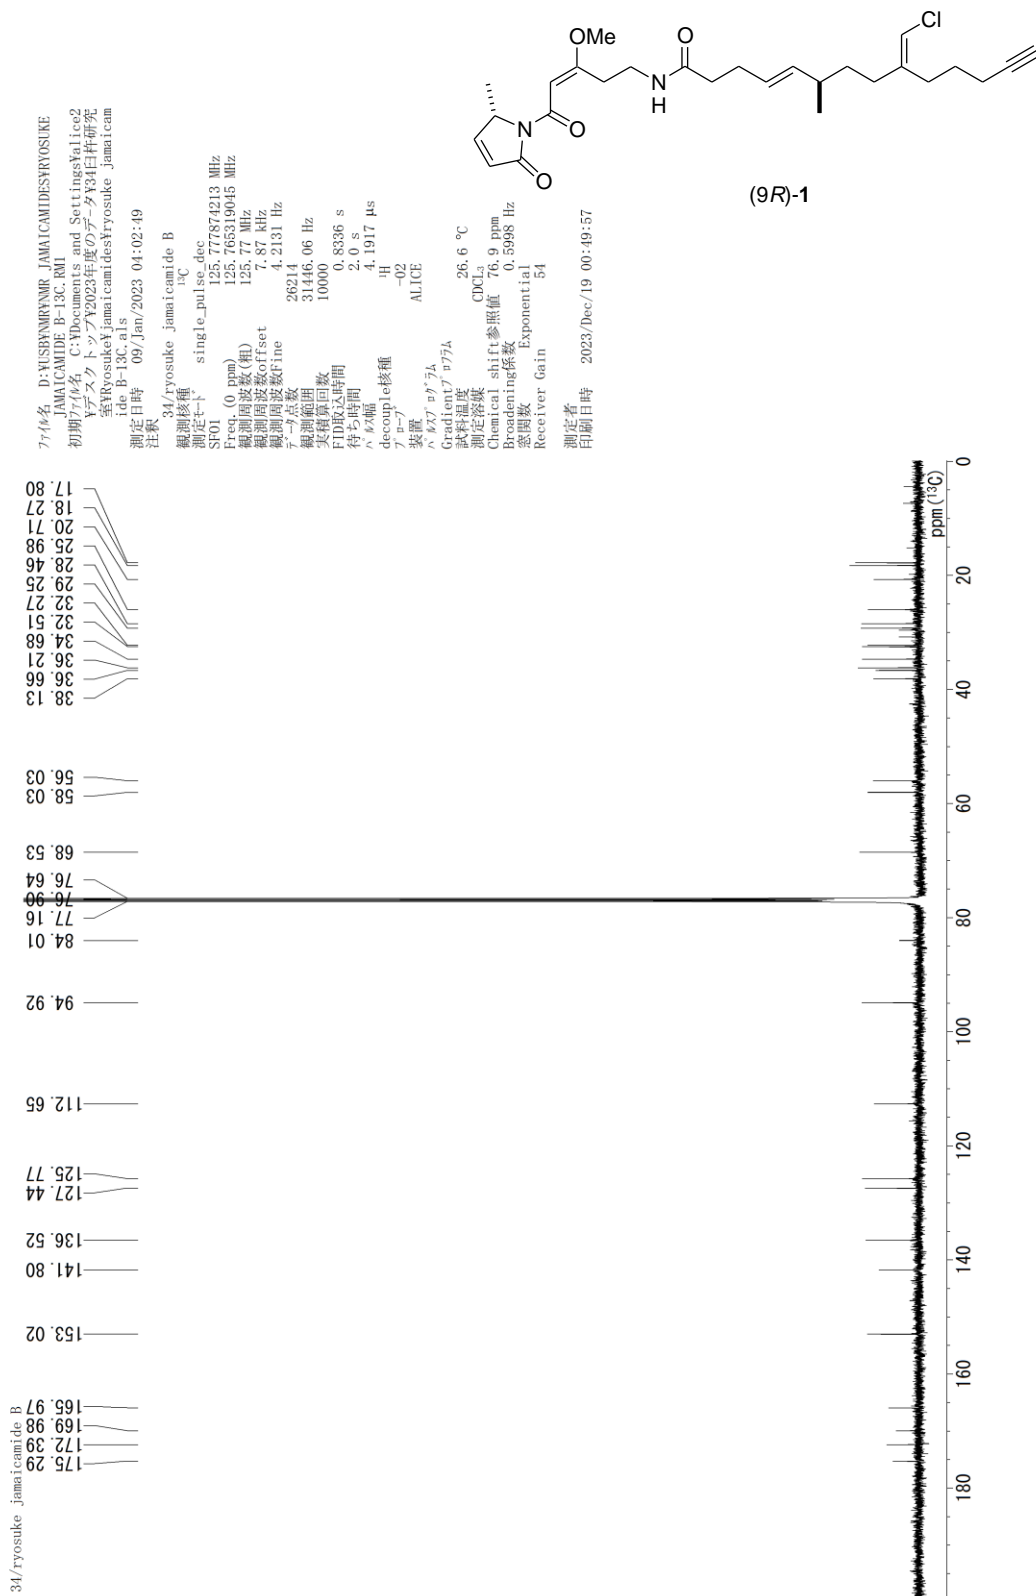

Table S1. Comparison of chemical shift of <sup>1</sup>H NMR of natural, (9*R*)-, and (9*S*)-jamaicamide B.

| Position number | Natural (600 MHz) | (9 <i>R</i> )-jamaicamide B (500MHz) | (9 <i>S</i> )-jamaicamide B (500MHz) |
|-----------------|-------------------|--------------------------------------|--------------------------------------|
| 1               | 1.97              | 1.98                                 | 2.00                                 |
| 2               | -                 | -                                    | -                                    |
| 3               | 2.19              | 2.21                                 | 2.22                                 |
| 4               | 1.64              | 1.65                                 | 1.65                                 |
| 5               | 2.26              | 2.28                                 | 2.28                                 |
| 6               | -                 | -                                    | -                                    |
| 7               | 1.99              | 2.00                                 | 2.01                                 |
| 8               | 1.33              | 1.35                                 | 1.35                                 |
| 9               | 2.01              | 2.02                                 | 2.02                                 |
| 10              | 5.26 (15.1, 7.8)  | 5.27 (9.0, 6.9)                      | 5.27 (9.2, 7.2)                      |
| 11              | 5.35 (15.1, 6.5)  | 5.35 (9.0, 6.8)                      | 5.35 (9.2, 7.1)                      |
| 12              | 2.28              | 2.31                                 | 2.30                                 |
| 13              | 2.17              | 2.18                                 | 2.18                                 |
| 14              | -                 | -                                    | -                                    |
| 15              | 3.5               | 3.5                                  | 3.5                                  |
| 16              | 2.98, 2.83        | 2.99, 2.86                           | 2.99, 2.85                           |
| 17              | -                 | -                                    | -                                    |
| 18              | 6.72              | 6.73                                 | 6.73                                 |
| 19              | -                 | -                                    | -                                    |
| 20              | -                 | -                                    | -                                    |
| 21              | 6.07, (6.2, 1.0)  | 6.09 (5.9, 2.0)                      | 6.09 (6.0, 2.2)                      |
| 22              | 7.21, (6.2, 1.9)  | 7.23 (6.1, 2.3)                      | 7.23 (6.0, 2.2)                      |
| 23              | 4.87              | 4.86                                 | 4.86                                 |
| 24              | 1.45 (6.6)        | 1.46 (7.6)                           | 1.48 (7.2)                           |
| 25              | 3.74              | 3.75                                 | 3.75                                 |
| 26              | 0.93 (6.7)        | 0.95 (7.5)                           | 0.96 (-)                             |
| 27              | 5.81              | 5.79                                 | 5.79                                 |
| NH              | 6.68              | 6.67                                 | 6.72                                 |

Table S2. Comparison of chemical shift of  $^{13}\text{C}$  NMR of natural and (9*R*)-jamaicamide B.

| Position number | Natural (600 MHz) | (9 <i>R</i> )-jamaicamide B (500MHz) |
|-----------------|-------------------|--------------------------------------|
| 1               | 68.6              | 68.7                                 |
| 2               | 84.1              | 84.2                                 |
| 3               | 18.3              | 18.5                                 |
| 4               | 26.1              | 26.2                                 |
| 5               | 29.3              | 29.5                                 |
| 6               | 141.9             | 142.0                                |
| 7               | 32.6              | 32.5                                 |
| 8               | 34.7              | 34.9                                 |
| 9               | 36.3              | 36.4                                 |
| 10              | 136.6             | 136.7                                |
| 11              | 127.5             | 127.7                                |
| 12              | 28.5              | 28.7                                 |
| 13              | 36.7              | 36.9                                 |
| 14              | 172.4             | 172.6                                |
| 15              | 38.2              | 38.3                                 |
| 16              | 32.2              | 32.7                                 |
| 17              | 175.4             | 175.5                                |
| 18              | 94.9              | 95.1                                 |
| 19              | 166.0             | 166.2                                |
| 20              | 170.1             | 170.2                                |
| 21              | 125.9             | 126.0                                |
| 22              | 153.1             | 153.2                                |
| 23              | 58.1              | 58.3                                 |
| 24              | 17.9              | 18.0                                 |
| 25              | 56.1              | 56.3                                 |
| 26              | 20.8              | 20.9                                 |
| 27              | 112.7             | 112.9                                |
| NH              | -                 | -                                    |
